# Supplementary material for: Risk of autism spectrum disorder in offspring following paternal use of selective serotonin reuptake inhibitors before conception: a population-based cohort study
Source: PubMed Central journal article supplement (PMC5770959; doi:10.1136/bmjopen-2017-016368), 2017-12-22
Supplement: bmjopen-2017-016368.draft_revisions.pdf [file bmjopen-2017-016368.draft_revisions.pdf]

# BMJ Open

BMJ Open is committed to open peer review. As part of this commitment we make the peer review history of every article we publish publicly available.

When an article is published we post the peer reviewers' comments and the authors' responses online. We also post the versions of the paper that were used during peer review. These are the versions that the peer review comments apply to.

The versions of the paper that follow are the versions that were submitted during the peer review process. They are not the versions of record or the final published versions. They should not be cited or distributed as the published version of this manuscript.

BMJ Open is an open access journal and the full, final, typeset and author-corrected version of record of the manuscript is available on our site with no access controls, subscription charges or pay-per-view fees (<http://bmjopen.bmj.com>).

If you have any questions on BMJ Open's open peer review process please email [editorial.bmjopen@bmj.com](mailto:editorial.bmjopen@bmj.com)

# BMJ Open

## Risk of autism spectrum disorder in offspring following paternal use of selective serotonin reuptake inhibitors before conception

|                                 |                                                                                                                                                                                                                                                                                                                                                                                                                                                                                                                                                                                                                                                                                                                                                                                                                                                                                                                              |
|---------------------------------|------------------------------------------------------------------------------------------------------------------------------------------------------------------------------------------------------------------------------------------------------------------------------------------------------------------------------------------------------------------------------------------------------------------------------------------------------------------------------------------------------------------------------------------------------------------------------------------------------------------------------------------------------------------------------------------------------------------------------------------------------------------------------------------------------------------------------------------------------------------------------------------------------------------------------|
| Journal:                        | <i>BMJ Open</i>                                                                                                                                                                                                                                                                                                                                                                                                                                                                                                                                                                                                                                                                                                                                                                                                                                                                                                              |
| Manuscript ID                   | bmjopen-2017-016368                                                                                                                                                                                                                                                                                                                                                                                                                                                                                                                                                                                                                                                                                                                                                                                                                                                                                                          |
| Article Type:                   | Research                                                                                                                                                                                                                                                                                                                                                                                                                                                                                                                                                                                                                                                                                                                                                                                                                                                                                                                     |
| Date Submitted by the Author:   | 10-Feb-2017                                                                                                                                                                                                                                                                                                                                                                                                                                                                                                                                                                                                                                                                                                                                                                                                                                                                                                                  |
| Complete List of Authors:       | <p>Yang, Fen<br/>           Chen, Jianping; Shanghai Institute of Planned Parenthood Research, Department of Reproductive Epidemiology and Social Science<br/>           Miao, Mao-Hua; Shanghai Institute of Planned Parenthood Research, Department of Reproductive Epidemiology and Social Science, National Population and Family Planning Key Laboratory of Contraceptive Drugs and Devices<br/>           Yuan, Wei; Shanghai Institute of Planned Parenthood Research, Reproductive Epidemiology, National Population and Family Planning Key Laboratory of Contraceptive Drugs and Devices;<br/>           Li, Lin<br/>           Liang, Hong; Shanghai Institute of Planned Parenthood Research, Department of Reproductive Epidemiology and Social Science, National Population and Family Planning Key Laboratory of Contraceptive Drugs and Devices<br/>           Ehrenstein, Vera<br/>           Li, Jiong</p> |
| <b>Primary Subject Heading</b>: | Public health                                                                                                                                                                                                                                                                                                                                                                                                                                                                                                                                                                                                                                                                                                                                                                                                                                                                                                                |
| Secondary Subject Heading:      | Mental health                                                                                                                                                                                                                                                                                                                                                                                                                                                                                                                                                                                                                                                                                                                                                                                                                                                                                                                |
| Keywords:                       | MENTAL HEALTH, Child & adolescent psychiatry < PSYCHIATRY, Adult psychiatry < PSYCHIATRY, NEUROPATHOLOGY                                                                                                                                                                                                                                                                                                                                                                                                                                                                                                                                                                                                                                                                                                                                                                                                                     |
|                                 |                                                                                                                                                                                                                                                                                                                                                                                                                                                                                                                                                                                                                                                                                                                                                                                                                                                                                                                              |

SCHOLARONE™  
Manuscripts

1  
2  
3  
4 **Risk of autism spectrum disorder in offspring following paternal use of selective**  
5  
6 **serotonin reuptake inhibitors before conception**  
7

8 Fen Yang<sup>1,2</sup>; Jianping Chen<sup>1</sup>; Maohua Miao<sup>1</sup>; Wei Yuan<sup>1</sup>; Lin Li<sup>1</sup>; Hong Liang<sup>1</sup>; Vera  
9 Ehrenstein<sup>2</sup>; Jiong Li<sup>2</sup>  
10  
11  
12

13  
14  
15  
16 **Author Affiliation**  
17

18 <sup>1</sup>Key Lab. of Reproduction Regulation of NPFPC, SIPPR, IRD, Fudan University,  
19 Shanghai, 200032, China  
20  
21

22 <sup>2</sup>Department of Clinical Epidemiology, Aarhus University Hospital, Olof Palmes Alle  
23 43-45, DK-8200 Aarhus N, Denmark  
24  
25  
26  
27  
28  
29  
30

31 **Corresponding Author**  
32

33 Hong Liang, MD, PhD  
34

35 Key Lab. of Reproduction Regulation of NPFPC, SIPPR, IRD, Fudan University,  
36 #779 Lao Hu Min Road, Shanghai, 200032, China.  
37  
38

39 Email: [lucylhen@163.com](mailto:lucylhen@163.com);  
40

41 Phone number: 86 -21-64771683  
42  
43  
44  
45  
46  
47  
48  
49  
50  
51  
52  
53  
54  
55  
56  
57  
58  
59  
60

**Abstract****Objective**

The present study aimed to examine the association between paternal selective serotonin reuptake inhibitors (SSRIs) use before conception and the risk of autism spectrum disorder (ASD) in offspring.

**Design**

A population-based cohort study

**Methods**

Based on Danish national registers, we conducted a cohort study of 669,922 children born from 1998 to 2008, with follow-up throughout 2013. The children whose fathers used SSRIs during the last 3 months prior to conception were identified as the exposed. Cox regression model was used to estimate the hazard ratio (HR) for ASD in children.

**Results**

Compared with unexposed children, the exposed had a 1.43-fold higher risk of ASD (HR=1.43, 95% confidence interval [CI]: 1.18-1.74) after adjusting for potential confounders. When extending the exposure window to 1 year before conception, the adjusted HR (aHR) of ASD in children of fathers who used SSRIs only from the last year till the last 3 months prior to conception and who used SSRIs both before and during the last 3 months prior to conception was 1.54 (95%CI: 1.21-1.94) and 1.32 (95%CI: 1.02-1.72), respectively. Whereas, the risk in children of fathers who used SSRIs only during the last 3 months prior to conception decreased and became

nonsignificant (aHR=1.17, 95%CI: 0.75-1.82).

## Conclusions

Our findings suggested no substantial increase in the risk of ASD in the offspring attributable to paternal SSRIs use before conception.

### Strengths and limitations of this study

- This is the very first study that investigates the link between paternal antidepressants use and ASD risk in children.
- A number of potential confounders, including sociodemographic factors as well as parental psychiatric history, can be adjusted for based on the availability of national health registry data.
- Actual use of SSRIs by fathers during the time period of interest may not be validated.
- Those children who received the diagnosis of ASD from private psychiatrists or remained undiagnosed at the end of the follow-up may not be identified as ASD

## Introduction

Depression is a common mental health problem that affects approximately 350 million people worldwide<sup>1</sup>. Selective serotonin reuptake inhibitors (SSRIs) are commonly prescribed for the treatment of depression and other anxiety-related disorders. However, an increasing body of evidence suggests that prenatal exposure to SSRIs is associated with adverse obstetrical and neonatal outcomes<sup>2-4</sup>. In addition, recent studies have indicated a possible link between prenatal SSRI exposure and neurobehavioral problems in children<sup>5,6</sup>.

Autism spectrum disorder (ASD) is one of the major neurodevelopmental disorders characterized by impairments in reciprocal social interaction, communication, and repetitive or stereotypic behavior<sup>7</sup>. The estimated prevalence of ASD has dramatically increased from less than 1 in 2,000 children in 1960s to approximately 1 in 145 children today<sup>8,9</sup>. Both genetic and environmental risk factors may contribute to ASD<sup>10</sup>. Recently, maternal use of SSRIs during pregnancy has been reported to be associated with an increased risk of ASD in children<sup>11-13</sup>.

If maternal SSRI exposure during pregnancy plays a role in fetal, even in child's, development, an extended effect of earlier exposure on gamete, particularly human sperm, is biologically plausible. Therefore, the potential role of paternal SSRI use in ASD should also be taken into consideration. Studies in the Nordic countries show that one-third of the fathers used prescription drugs during the last 6 months prior to conception<sup>14</sup>, and approximately 1.4% of fathers were dispensed SSRIs during the last 3 months prior to conception<sup>15,16</sup>. Although the information regarding the

1  
2  
3  
4 potential effects of SSRI use by fathers is limited, the hypothesis of an increased risk  
5  
6 of adverse pregnancy or neonatal outcome associated with paternal drug exposure is  
7  
8 not new. Evidence from experimental studies suggests that paternal exposure to a  
9  
10 broad range of xenobiotic agents may induce reproductive and developmental  
11  
12 abnormalities in the subsequent offspring, e.g., spontaneous abortions, congenital  
13  
14 malformations, growth retardation, neurobehavioral deficits, or carcinogenesis<sup>17-19</sup>.  
15  
16 Epidemiologic studies have also shown that certain pharmacological agents used by  
17  
18 fathers before conception may increase the risk of spontaneous abortions, birth defects  
19  
20 or childhood cancers<sup>20,21</sup>. The potential mechanisms behind the male-mediated effects  
21  
22 include: 1) genetic or epigenetic changes with direct disturbances in spermatocytes; 2)  
23  
24 indirect effects by transmission of the xenobiotic agents to the female via the seminal  
25  
26 fluid<sup>17, 18</sup>. Several studies have indicated the adverse effects of paternal SSRIs use,  
27  
28 including impaired semen quality and abnormal sperm DNA fragmentation<sup>22, 23</sup>,  
29  
30 which has been reported to be associated with diminished fertility, adverse pregnancy  
31  
32 outcomes, and an increased risk of childhood disease<sup>24</sup>.  
33  
34  
35  
36  
37  
38  
39  
40

41 Little is known on whether paternal SSRIs use before conception contributes to  
42  
43 the risk of ASD in offspring. We conducted a population-based cohort study to  
44  
45 examine the association between paternal SSRIs use during the last 3 months prior to  
46  
47 conception and risk of ASD in offspring, utilizing data from national Danish health  
48  
49 registries.  
50  
51  
52  
53  
54  
55

## 56 **Methods**

57  
58  
59  
60

## Study Population

This study was based on several national registers in Denmark. Each Danish resident is assigned a unique personal identification number (a 10-digit civil registration system number used in all registries), which enables accurate linkage of national registries at the individual level<sup>25</sup>. The Danish Medical Birth Registry (DMBR) contains records of all deliveries in Denmark since 1973 and includes information about gestational age at birth from 1978<sup>26</sup>. Using the DMBR data, we identified a cohort of all singletons born alive in Denmark during the period of January 1, 1998 through December 31, 2008 (n=687,580). We excluded children without linkage to their father (n=16,955) or their mother (n=74), with missing parity (n=208), and with missing or extreme values of gestational age ( $\leq 23$  weeks or  $\geq 45$  weeks, n=421). A total of 669,922 children were included in the analysis.

## Data on SSRIs use

Information on SSRIs use was drawn from the Danish National Prescription Registry (DNPR)<sup>27</sup>. Since 1995, this registry has recorded all redeemed prescriptions in Denmark with the following information: the civil registration number of the patient, the dispensing date, the medication code (the WHO Anatomical Therapeutic Chemical (ATC) classification system), the number of packages prescribed, and the number of doses units in package. Selective serotonin reuptake inhibitors use was identified based on ATC codes: fluoxetine (N06AB03), citalopram (N06AB04), paroxetine (N06AB05), sertraline (N06AB06), fluvoxamine (N06AB08), and escitalopram (N06AB10). It is estimated that spermatogenesis takes approximately 74 days<sup>20</sup>,



1  
2  
3  
4 therefore we chose the last 3 months prior to conception as the exposure window to  
5  
6 cover the susceptible time period. A child was considered exposed if the dispensing  
7  
8 date fell within the specified exposure window or the number of days for which the  
9  
10 SSRIs medication was supplied overlapped any portion of the exposure window.  
11  
12 Children born to fathers who had no prescriptions for SSRIs and no supply overlap  
13  
14 during the entire exposure window were considered unexposed. The date of  
15  
16 conception was estimated by subtracting gestational age from the date of delivery.  
17  
18 Data on paternal SSRIs use during the last two years prior to the conception were  
19  
20 extracted for further analyses. We also retrieved the information about maternal SSRIs  
21  
22 use during the pregnancy.  
23  
24  
25  
26  
27

### 28 **Autism spectrum disorders**

29  
30 Autism spectrum disorders in children were identified by using the Danish Psychiatric  
31  
32 Central Research Register (DPCRR) and the Danish National Patient Register  
33  
34 (DNPR). The DPCRR contains diagnostic information on every admission from  
35  
36 psychiatric hospitals and psychiatric wards in general hospitals in Denmark since  
37  
38 1969, and includes data on all outpatient visits and emergency room contacts since  
39  
40 1995<sup>28</sup>. The DNPR has collected data on all inpatients from all somatic hospitals in  
41  
42 Denmark since 1977 and outpatients from 1995<sup>29</sup>. The combined data from the two  
43  
44 registries were used to identify all children diagnosed with ASD. During the study  
45  
46 period, the diagnosis of ASD was based on the International Classification of  
47  
48 Diseases, 10th version (ICD-10) codes of F84.0 (Childhood autism), F84.1 (Atypical  
49  
50 autism), F84.5 (Asperger syndrome), F84.8 (other pervasive developmental  
51  
52  
53  
54  
55  
56  
57  
58  
59  
60

1  
2  
3 disorders) and F84.9 (unspecified pervasive developmental disorders). The quality of  
4  
5 the childhood autism diagnosis has been validated and the diagnoses could be  
6  
7 verified in 94% of the children with a record in the DPCRR<sup>30</sup>. Children were  
8  
9 followed up from birth till first diagnosis of ASD, death, emigration, or December 31,  
10  
11 2013, whichever came first.  
12  
13

### 14 15 16 **Covariates**

17  
18 Using the Danish nationwide health registers, we retrieved data on characteristics that  
19  
20 may be associated with offspring ASD or paternal SSRIs use. For each child, we  
21  
22 obtained information on calendar year of birth, gender of the child, birth weight,  
23  
24 Apgar score at 5 minutes, gestational age, maternal parity, maternal age at child birth,  
25  
26 paternal age at child birth and maternal smoking status during pregnancy from the  
27  
28 DMBR. Parents' psychiatric history prior to birth of the index child was obtained  
29  
30 from DPCRR by ICD-8 codes 290-315 from 1977 to 1993 and ICD-10 codes F00-F99  
31  
32 from 1994 onward. Furthermore, we identified parents diagnosed with affective  
33  
34 disorders before birth of child (specifically, ICD-8 codes 296.09, 296.19, 296.29,  
35  
36 296.39, 296.99, 298.09, 298.19, 300.49, and 301.19, and ICD-10 codes F30-F34 and  
37  
38 F38-F39) using the DPCRR.  
39  
40  
41  
42  
43  
44  
45

### 46 47 **Statistical Analysis**

48  
49 Cox proportional-hazards regression models were used to estimate the hazard ratios  
50  
51 (HRs) and 95% confidence intervals (CIs) of ASD in children following exposure to  
52  
53 paternal SSRIs use before conception.  
54  
55  
56  
57  
58  
59  
60

1  
2  
3  
4 We adjusted for variables as following: the calendar year of birth (1998-2000,  
5  
6 2001-2003, 2004-2006, 2007-2008), gender of the child (boy, girl), parity (1, 2,  $\geq 3$ ),  
7  
8 parental age at child birth ( $\leq 25$ , 26-30, 31-35, and  $> 35$  years), maternal smoking  
9  
10 status during pregnancy (yes or no), maternal history of psychiatric disorders before  
11  
12 birth of child (yes or no), maternal antidepressants use during pregnancy (yes or no)  
13  
14 in model 1. We additionally adjusted for paternal history of psychiatric disorders  
15  
16 before birth of child (yes or no) in model 2. Models were also run with the exclusion  
17  
18 of those children with missing data for covariates.  
19  
20  
21  
22  
23

24 To distinguish the direct effects of SSRIs use from the effects of the indication of  
25  
26 SSRIs use, we extended the exposure window to 1 year before conception. We then  
27  
28 re-categorized the exposed children into three subgroups: children of fathers who used  
29  
30 SSRIs 1) only from the last year till the last 3 months prior to conception (former  
31  
32 SSRIs users); 2) only during the last 3 months prior to conception (current SSRIs  
33  
34 users); 3) both before and during the last 3 months prior to conception (both former  
35  
36 and current SSRIs users). The reference group consisted of those children born to  
37  
38 fathers who never used SSRIs medication through the last year before conception.  
39  
40  
41  
42  
43

44 The stratified analysis was performed to examine whether the association between  
45  
46 paternal SSRIs use and ASD in children differed by gender. We also restricted the  
47  
48 analyses to children whose mothers neither received antidepressant medication during  
49  
50 pregnancy nor had affective disorder before birth of child. To further distinguish the  
51  
52 effect of SSRIs medication from that of paternal affective disorders, we performed  
53  
54  
55  
56  
57  
58  
59  
60

1  
2  
3 stratified analyses according to paternal history of affective disorder before birth of  
4  
5  
6 the index child.  
7

8  
9 Besides, to control for unmeasured family-related confounding factors, we  
10  
11 re-conducted a sibling study by restricting to families with more than one child and  
12  
13 with at least one child with paternal SSRIs preconception exposure. Using the  
14  
15 stratified Cox proportional-hazards regression, we then compared exposed siblings to  
16  
17 unexposed siblings to estimate the association between paternal SSRIs use before  
18  
19 conception and ASD in children.  
20  
21

22  
23  
24 All analyses were performed using SAS version 9.1 (SAS Institute Inc, Cary,  
25  
26 North Carolina, USA).  
27

## 28 29 **Results**

30  
31 Among the 669,922 singletons included in the study, 6,870 (1.03%) children were  
32  
33 born to fathers who had redeemed a prescription for SSRIs during the last 3 months  
34  
35 prior to conception. During the study period, a total of 7,577 children were diagnosed  
36  
37 with ASD. The median age at diagnosis of ASD was 6.77 years (interquartile range:  
38  
39 4.84 to 9.48 years). Characteristics of the study population are shown in Table 1.  
40  
41 Compared with the unexposed group, there were a higher proportion of exposed  
42  
43 children born in later calendar years. Fathers in exposed group were more likely to be  
44  
45 older at child birth and to have a history of psychiatric disorder (including affective  
46  
47 disorder) before birth of child. Mothers of exposed children were characterized as  
48  
49 having higher parity, being more likely to be older at child birth, to use  
50  
51  
52  
53  
54  
55  
56  
57  
58  
59  
60

1  
2  
3  
4 antidepressants during pregnancy, and to have a history of psychiatric disorder before  
5  
6 birth of child.  
7

8  
9 Among 61,555 person-years of follow-up, we identified 104 cases of ASD in  
10  
11 children born to fathers who used SSRIs during the last 3 months prior to conception  
12  
13 (incidence rate: 169 per 100,000 person-years). This incidence rate corresponded to a  
14  
15 62% increased risk of ASD compared with the unexposed group (Table 2). The  
16  
17 adjusted HR (aHR) of ASD was 1.54 (95% CI: 1.27-1.88) after adjusting for potential  
18  
19 confounders in model 1. After paternal psychiatric history was further adjusted for in  
20  
21 model 2, the estimate was 1.43 (95%CI: 1.18-1.74). When extending the exposure  
22  
23 window to the last one year prior to conception, the aHR for ASD in children of  
24  
25 fathers who were former users only and who were both former and current users was  
26  
27 1.54 (95%CI: 1.21-1.94) and 1.32 (95%CI: 1.02-1.72), respectively. However, the  
28  
29 increased risk decreased and became nonsignificant among children of fathers who  
30  
31 were only current users (aHR=1.17, 95%CI: 0.75-1.82, model 2, table2).  
32  
33  
34  
35  
36  
37  
38

39 The risk estimates of ASD were similar for both boys and girls, regardless of the  
40  
41 exposure (Table S1). When we restricted analyses to children whose mothers neither  
42  
43 used SSRIs during pregnancy nor had affective disorder before birth of child, the  
44  
45 results did not change essentially (Table S2).  
46  
47  
48

49 When the analyses were stratified by paternal affective disorder before birth of the  
50  
51 index child, in children born to fathers with a history of affective disorder, there was  
52  
53 no association between paternal SSRIs use before conception and ASD in the  
54  
55 offspring (model 2: aHR=1.10, 95%CI: 0.61-1.98). For children whose father without  
56  
57  
58  
59  
60

1  
2  
3  
4 affective disorder, the patterns of associations remained similar to those of the main  
5  
6 analyses (Table 3).  
7

8  
9 In the sibling analysis, we identified 5,479 families with more than one child and  
10  
11 with at least one child with paternal SSRIs use before conception (Table 4). The risk  
12  
13 of ASD in exposed children was similar when compared with their unexposed siblings  
14  
15 (aHR=1.04, 95%CI: 0.94-1.14).  
16  
17

## 18 19 **Discussion**

20  
21 In this large population-based cohort study, we observed an increased crude risk of  
22  
23 ASD in the offspring following paternal use of SSRIs during the last 3 months prior to  
24  
25 conception. However, the risk attenuated after adjusting for a number of potential  
26  
27 confounders, especially fathers' psychiatric conditions. When extending the exposure  
28  
29 window to one year before conception, the ASD risk persisted among children born to  
30  
31 former users but not current users. In addition, among children born to father with  
32  
33 affective disorder, no association was observed. Finally, we performed a sibling  
34  
35 analysis which allowed for better control of unmeasured familial confounding and no  
36  
37 difference in the ASD risk was found among exposed children and their unexposed  
38  
39 siblings. Taken as a whole, our results did not support that paternal SSRIs use before  
40  
41 conception could increase the risk of ASD in children.  
42  
43  
44  
45  
46  
47

48  
49 Recently, concerns have been raised regarding the risk of ASD in the offspring  
50  
51 associated with prenatal exposure to SSRIs. Three previous human studies have  
52  
53 suggested that in utero exposure to antidepressants would increase the risk of ASD in  
54  
55 children<sup>11-13</sup>, although another two studies using the Danish registers have reported no  
56  
57  
58  
59  
60

1  
2  
3 significant association<sup>31,32</sup>. Basic neuro-biologic studies have showed that prenatal  
4  
5  
6 SSRIs administration may be part of a causal pathway to ASD by operating directly  
7  
8  
9 on the developing brain<sup>33,34</sup>. Considering the detrimental effect of SSRIs on sperm<sup>22,</sup>  
10  
11  
12 <sup>23,35</sup>, paternal SSRIs use before conception may also cause adverse effects on  
13  
14 pregnancy outcomes. However, till now, only one study have suggested that SSRIs  
15  
16 administration to male rats could induce deterioration in fertility and fetal outcomes  
17  
18 (including weight gain, organ weights and feed consumption)<sup>36</sup>. To our knowledge,  
19  
20  
21 our study is the first to investigate the link between paternal antidepressants use and  
22  
23  
24 ASD risk in children. Considering the limited number of ASD cases and the  
25  
26  
27 challenges posed by confounding, further studies are needed to corroborate the  
28  
29  
30 findings.

31  
32 In the present study, the increased risk of ASD observed in former users but not in  
33  
34 current users implied that indications for paternal SSRIs use may account for the  
35  
36 observed association between paternal SSRIs use and ASD in children, which was  
37  
38 supported by previous studies suggesting that parental depression and other  
39  
40 psychiatric disorders might be associated with the risk of autism in children<sup>37-39</sup>.  
41  
42  
43 When we further looked into those children without paternal affective disorder (the  
44  
45 main indication for SSRIs) before birth of child, similar patterns of association to the  
46  
47 main analyses were found. Thus, in addition to affective disorders, other indications  
48  
49 related to SSRIs use may also contribute to the observed association.  
50  
51  
52

53  
54 Our study has several methodological strengths. One strength was that the linkage  
55  
56 of several nationwide health registries in Denmark enabled us to conduct a large  
57  
58  
59

1  
2  
3  
4 cohort study with virtually complete follow-up. The definition on exposure to SSRIs  
5  
6 was based on a national registry, which eliminated the risk of recall bias caused by  
7  
8 self-report. Another strength was that the information on ASD diagnosis was obtained  
9  
10 independently of exposure measurement, which could also mitigate the information  
11  
12 bias. Furthermore, the availability of health registry data enabled us to adjust for a  
13  
14 number of potential confounders including sociodemographic factors as well as  
15  
16 parental psychiatric history.  
17  
18  
19

20  
21       Limitations need to be considered when interpreting the results of our study.  
22  
23 Firstly, we were unable to validate actual use of SSRIs by fathers during the time  
24  
25 period of interest because we relied on medical records of dispensed prescriptions.  
26  
27 This may lead to misclassification of exposure status because some people may not  
28  
29 take the medication or may take it later. Nevertheless, the misclassification was most  
30  
31 likely non-differential, which could bias the association toward null. Besides, some  
32  
33 patients may receive SSRIs treatment during inpatient admissions which are not  
34  
35 included in the prescription registry. We expect this problem to be minor since those  
36  
37 inpatients usually have severe psychiatric disorders and are more likely to continue  
38  
39 treatment after discharge. Secondly, the 3-month cut-off point was set based on the  
40  
41 fact that spermatogenesis takes approximately 70-90 days in humans. Whereas it may  
42  
43 be possible that SSRIs drugs induce sperm damage at the very primitive stage.  
44  
45 However, the results did not change markedly after extending the putative exposure  
46  
47 period to the last 6 months prior to conception (data not shown). Thirdly, ASD in  
48  
49 children was ascertained through the DNPR and the DPCRR, which did not include  
50  
51  
52  
53  
54  
55  
56  
57  
58  
59  
60



1  
2  
3 those children who received the diagnosis of ASD from private psychiatrists or  
4  
5 remained undiagnosed at the end of the follow-up. However, the prevalence of ASD  
6  
7 in our cohort was 1.13%, which was similar to that reported in the United States  
8  
9 during the study period (1.14%)<sup>40</sup>. Hence the bias introduced by case identification  
10  
11 was expected to be minimal.  
12  
13  
14

### 15 16 **Conclusions**

17  
18 Our evidence does not support that paternal SSRIs use before conception increases the  
19  
20 risk of ASD in the offspring, but implicates that paternal underlying indications  
21  
22 related to SSRIs use, or other unmeasured confounding factors may play a role.  
23  
24  
25  
26  
27

### 28 **Footnotes**

29  
30 This cohort study was approved by the Danish Data Protection Agency (Record No.  
31  
32 2013-41-2569).  
33  
34

35 **Contributors:** HL had full access to all the data in the study and took responsibility  
36  
37 for the integrity of the data and the accuracy of the data analysis. HL, WY and JL  
38  
39 conceptualized and designed the study. FY conducted the statistical analysis. HL, PC  
40  
41 and FY interpreted the results and FY drafted the initial manuscript. All authors  
42  
43 reviewed the manuscript and approved the final version.  
44  
45  
46

47 **Funding:** The study was supported by the National Natural Science Foundation of  
48  
49 China (81428011), the National Key Research and Development Program of China  
50  
51 (2016YFC1000505), the European Research Council  
52  
53 (ERC-2010-StG-260242-PROGEURO), Nordic Cancer Union (2015-176673), Danish  
54  
55  
56  
57  
58  
59  
60

Council for Independent Research (DFF-6110-00019), and Karen Elise Jensens Fond (2016).

**Competing interests:** The authors declare that they have no conflict of interest.

**Statement of the independence of researchers from funders:** The funding sources had no role in the design and conduct of the study; collection, management, analysis, and interpretation of the data; and preparation, review, or approval of the manuscript; and decision to submit the manuscript for publication. The researchers were independent from the funders.

**Ethical approval:** For this type of study formal consent is not required.

**Data sharing statement:** No additional data are available.

## Reference

1. Organization WH. Depression [fact sheet no. 369]. 2012. As of September. 2015;30.
2. Wen SW, Yang Q, Garner P, et al. Selective serotonin reuptake inhibitors and adverse pregnancy outcomes. *American journal of obstetrics and gynecology*. 2006;194(4):961-966.
3. Lund N, Pedersen LH, Henriksen TB. Selective serotonin reuptake inhibitor exposure in utero and pregnancy outcomes. *Archives of pediatrics & adolescent medicine*. 2009;163(10):949-954.
4. Pedersen LH, Henriksen TB, Vestergaard M, et al. Selective serotonin reuptake inhibitors in pregnancy and congenital malformations: population based cohort study. *Bmj*. 2009;339:b3569.
5. Oberlander TF, Reebye P, Misri S, et al. Externalizing and attentional behaviors in children of depressed mothers treated with a selective serotonin reuptake inhibitor antidepressant during pregnancy. *Archives of pediatrics & adolescent medicine*. 2007;161(1):22-29.
6. Nulman I, Koren G, Rovet J, et al. Neurodevelopment of children following prenatal exposure to venlafaxine, selective serotonin reuptake inhibitors, or untreated maternal depression. *American Journal of Psychiatry*. 2012;169(11):1165-1174.
7. Baird G, Simonoff E, Pickles A, et al. Prevalence of disorders of the autism spectrum in a population cohort of children in South Thames: the Special Needs and Autism Project (SNAP). *The lancet*. 2006;368(9531):210-215.
8. Rutter M. Incidence of autism spectrum disorders: Changes over time and their meaning\*. *Acta paediatrica*. 2005;94(1):2-15.
9. Hill AP, Zuckerman K, Fombonne E. Epidemiology of autism spectrum disorders. *Translational Approaches to Autism Spectrum Disorder: Springer* 2015:13-38.
10. Newschaffer CJ, Croen LA, Daniels J, et al. The epidemiology of autism spectrum disorders\*. *Annu Rev Public Health*. 2007;28:235-258.

11. Gidaya NB, Lee BK, Burstyn I, et al. In utero exposure to selective serotonin reuptake inhibitors and risk for autism spectrum disorder. *Journal of autism and developmental disorders*. 2014;44(10):2558-2567.
12. Croen LA, Grether JK, Yoshida CK, et al. Antidepressant use during pregnancy and childhood autism spectrum disorders. *Archives of general psychiatry*. 2011;68(11):1104-1112.
13. Rai D, Lee BK, Dalman C, et al. Parental depression, maternal antidepressant use during pregnancy, and risk of autism spectrum disorders: population based case-control study. 2013.
14. Schirm E, Pedersen L, Tobi H, et al. Drug use among fathers around time of conception: two register based surveys from Denmark and The Netherlands. *Pharmacoepidemiology and drug safety*. 2004;13(9):609-613.
15. Engeland A, Bramness JG, Daltveit AK, et al. Prescription drug use among fathers and mothers before and during pregnancy. A population - based cohort study of 106 000 pregnancies in Norway 2004 - 2006. *British journal of clinical pharmacology*. 2008;65(5):653-660.
16. Crijns I, Bos J, Knol M, et al. Paternal drug use: before and during pregnancy. *Expert opinion on drug safety*. 2012;11(4):513-518.
17. Sever LE. Male-mediated developmental toxicity. *Toxicology & Applied Pharmacology*. 1993;14(1):506-513.
18. Friedler G. Paternal exposures: Impact on reproductive and developmental outcome. An overview. *Pharmacology Biochemistry & Behavior*. 1996;55(4):691-700.
19. Anderson D, Schmid TE, Baumgartner A. Male-mediated developmental toxicity. *Asian journal of andrology*. 2014;16(1):81.
20. Cordier S. Evidence for a role of paternal exposures in developmental toxicity. *Basic & clinical pharmacology & toxicology*. 2008;102(2):176-181.
21. Engeland A, Børge T, Daltveit AK, et al. Effects of preconceptional paternal drug exposure on birth outcomes: cohort study of 340 000 pregnancies using Norwegian population - based databases. *British journal of clinical pharmacology*. 2013;75(4):1134-1141.
22. Tanrikut C, Feldman AS, Altemus M, et al. Adverse effect of paroxetine on sperm. *Fertility and sterility*. 2010;94(3):1021-1026.
23. Safarinejad MR. Sperm DNA damage and semen quality impairment after treatment with selective serotonin reuptake inhibitors detected using semen analysis and sperm chromatin structure assay. *The Journal of urology*. 2008;180(5):2124-2128.
24. Lewis S, Aitken R. DNA damage to spermatozoa has impacts on fertilization and pregnancy. *Cell and tissue research*. 2005;322(1):33-41.
25. Pedersen CB, Gøtzsche H, Møller JØ, et al. The Danish civil registration system. *Dan Med Bull*. 2006;53(4):441-449.
26. Knudsen LB, Olsen J. The Danish Medical Birth Registry. *Danish medical bulletin*. 1998;45(3):320-323.
27. Kildemoes HW, Sørensen HT, Hallas J. The Danish national prescription registry. *Scandinavian journal of public health*. 2011;39(7 suppl):38-41.
28. Mors O, Perto GP, Mortensen PB. The Danish psychiatric central research register. *Scandinavian journal of public health*. 2011;39(7 suppl):54-57.
29. Andersen TF, Madsen M, Jørgensen J, et al. The Danish National Hospital Register. A valuable source of data for modern health sciences. *Danish medical bulletin*. 1999;46(3):263-268.
30. Lauritsen MB, Jørgensen M, Madsen KM, et al. Validity of childhood autism in the Danish

- 1  
2  
3 Psychiatric Central Register: findings from a cohort sample born 1990–1999. *Journal of autism and*  
4 *developmental disorders*. 2010;40(2):139-148.
- 5 31. Christensen J, Parner ET, Vestergaard M. Antidepressant exposure in pregnancy and risk of autism  
6 spectrum disorders. *Clinical epidemiology*. 2013;5:449-459.
- 7 32. Hviid A, Melbye M, Pasternak B. Use of selective serotonin reuptake inhibitors during pregnancy  
8 and risk of autism. *New England Journal of Medicine*. 2013;369(25):2406-2415.
- 9 33. Maciag D, Simpson KL, Coppinger D, et al. Neonatal antidepressant exposure has lasting effects  
10 on behavior and serotonin circuitry. *Neuropsychopharmacology*. 2006;31(1):47-57.
- 11 34. Bonnin A, Levitt P. Fetal, maternal and placental sources of serotonin and new implications for  
12 developmental programming of the brain. *Neuroscience*. 2011;197:1.
- 13 35. Tanrikut C, Schlegel PN. Antidepressant-associated changes in semen parameters. *Urology*.  
14 2007;69(1):185. e185-185. e187.
- 15 36. Elmazoudy R, Abdelhameed N, Elmasry A. Paternal dapoxetine administration induced  
16 deterioration in reproductive performance, fetal outcome, sexual behavior and biochemistry of male  
17 rats. *International Journal of Impotence Research*. 2015;27(6).
- 18 37. Daniels JL, Forssen U, Hultman CM, et al. Parental psychiatric disorders associated with autism  
19 spectrum disorders in the offspring. *Pediatrics*. 2008;121(5):e1357-e1362.
- 20 38. Larsson HJ, Eaton WW, Madsen KM, et al. Risk factors for autism: perinatal factors, parental  
21 psychiatric history, and socioeconomic status. *American journal of epidemiology*.  
22 2005;161(10):916-925.
- 23 39. Jokiranta E, Brown AS, Heinimaa M, et al. Parental psychiatric disorders and autism spectrum  
24 disorders. *Psychiatry research*. 2013;207(3):203-211.
- 25 40. Kogan MD, Blumberg SJ, Schieve LA, et al. Prevalence of parent-reported diagnosis of autism  
26 spectrum disorder among children in the US, 2007. *Pediatrics*. 2009;124(5):1395-1403.
- 27  
28  
29  
30  
31  
32  
33  
34  
35  
36  
37  
38  
39  
40  
41  
42  
43  
44  
45  
46  
47  
48  
49  
50  
51  
52  
53  
54  
55  
56  
57  
58  
59  
60

**Table1. Baseline Characteristics of the study population**

| <b>Characteristic</b>                               | <b>Paternal SSRIs use during the last 3 months prior to conception<br/>(N=6,870)</b> | <b>No paternal SSRIs use during the last 3 months prior to conception<br/>(N=663, 052)</b> |
|-----------------------------------------------------|--------------------------------------------------------------------------------------|--------------------------------------------------------------------------------------------|
| <b>Calendar Year of birth, No. (%)</b>              |                                                                                      |                                                                                            |
| 1998-2000                                           | 1,021(14.9)                                                                          | 185,784(28.0)                                                                              |
| 2001-2003                                           | 1,526(22.2)                                                                          | 179,952(27.1)                                                                              |
| 2004-2006                                           | 2,305(33.5)                                                                          | 178,664(27.0)                                                                              |
| 2007-2008                                           | 2,018(29.4)                                                                          | 118,652(17.9)                                                                              |
| <b>Gender, No. (%)</b>                              |                                                                                      |                                                                                            |
| Boy                                                 | 3,549(51.7)                                                                          | 340,194(51.3)                                                                              |
| Girl                                                | 3,321(48.3)                                                                          | 322,858(48.7)                                                                              |
| <b>Birth Weight (g), No. (%)</b>                    |                                                                                      |                                                                                            |
| <2500                                               | 278(4.1)                                                                             | 22,315(3.4)                                                                                |
| 2500-3250                                           | 1,729(25.2)                                                                          | 154,494(23.3)                                                                              |
| 3250-4000                                           | 3,582(52.1)                                                                          | 348,853(52.6)                                                                              |
| 4000-8000                                           | 1,243(18.1)                                                                          | 132,343(19.9)                                                                              |
| Unknown                                             | 38(0.5)                                                                              | 5,047(0.8)                                                                                 |
| <b>Parity, No. (%)</b>                              |                                                                                      |                                                                                            |
| 1                                                   | 2,693(39.2)                                                                          | 282,895(42.7)                                                                              |
| 2                                                   | 2,433(35.4)                                                                          | 250,496(37.8)                                                                              |
| ≥3                                                  | 1,744(25.4)                                                                          | 129,661(19.5)                                                                              |
| <b>Preterm Birth, No. (%)</b><br>(<37 weeks)        |                                                                                      |                                                                                            |
| No                                                  | 6,489(94.4)                                                                          | 630,851(95.1)                                                                              |
| Yes                                                 | 381(5.6)                                                                             | 32,201(4.9)                                                                                |
| <b>Apgar score at 5 minutes, No. (%)</b>            |                                                                                      |                                                                                            |
| 0-7                                                 | 91(1.3)                                                                              | 8,224(1.2)                                                                                 |
| 8-9                                                 | 442(6.4)                                                                             | 39,941(6.0)                                                                                |
| 10                                                  | 6,269(91.3)                                                                          | 607,634(91.7)                                                                              |
| Unknown                                             | 68(1.0)                                                                              | 7,253(1.1)                                                                                 |
| <b>Maternal age at child birth (years), No. (%)</b> |                                                                                      |                                                                                            |
| ≤25                                                 | 958(13.9)                                                                            | 99,273(15.0)                                                                               |
| 26-30                                               | 2,238(32.6)                                                                          | 244,419(36.9)                                                                              |
| 31-35                                               | 2,386(34.7)                                                                          | 225,610(34.0)                                                                              |
| >35                                                 | 1,288(18.8)                                                                          | 93,750(14.1)                                                                               |
| <b>Paternal age at child birth (years), No. (%)</b> |                                                                                      |                                                                                            |
| ≤25                                                 | 364(5.3)                                                                             | 47,490(7.2)                                                                                |
| 26-30                                               | 1,434(20.9)                                                                          | 180,612(27.2)                                                                              |
| 31-35                                               | 2,395(34.8)                                                                          | 242,702(36.6)                                                                              |
| >35                                                 | 2,677(39.0)                                                                          | 192,248(29.0)                                                                              |

**Table 1. Baseline Characteristics of the study population (continued)**

| <b>Maternal smoking status<sup>a</sup>, No. (%)</b>      |              |               |
|----------------------------------------------------------|--------------|---------------|
| No                                                       | 4,326(63.0)  | 477,574(72.0) |
| Yes                                                      | 1,334(19.4)  | 106,233(16.0) |
| Unknown                                                  | 1,210(17.6)  | 79,245(12.0)  |
| <b>Maternal AD use during pregnancy, No. (%)</b>         |              |               |
| No                                                       | 6,548(94.0)  | 653,496(98.6) |
| Yes                                                      | 412(6.0)     | 9,556(1.4)    |
| <b>Maternal history of Affective disorder, No. (%)</b>   |              |               |
| No                                                       | 6,607(96.2)  | 654,234(98.7) |
| Yes                                                      | 263(3.8)     | 8,818(1.3)    |
| <b>Paternal history of Affective disorder, No. (%)</b>   |              |               |
| No                                                       | 6,099 (88.8) | 659,639(99.5) |
| Yes                                                      | 771(11.2)    | 3,413(0.5)    |
| <b>Maternal history of psychiatric disorder, No. (%)</b> |              |               |
| No                                                       | 6,175(89.9)  | 626,840(94.5) |
| Yes                                                      | 695(10.1)    | 36,212(5.5)   |
| <b>Paternal history of psychiatric disorder, No. (%)</b> |              |               |
| No                                                       | 5,092 (74.1) | 630,990(95.2) |
| Yes                                                      | 1,178(25.9)  | 32,062(4.8)   |

**Abbreviations:** SSRI, selective serotonin reuptake inhibitor; N, number; AD, antidepressant drugs;

<sup>a</sup> Maternal smoking information was missing among those children born from 2007 to 2008.

Table 2. Association between paternal SSRIs use before conception and ASD in offspring

| Paternal SSRIs use before conception                                   | Offspring with ASD no. | Follow-up no. of person-yr | Hazard Ratio (95% CI) |                      |                      |
|------------------------------------------------------------------------|------------------------|----------------------------|-----------------------|----------------------|----------------------|
|                                                                        |                        |                            | Crude                 | Model 1 <sup>a</sup> | Model 2 <sup>b</sup> |
| No use during the last 3 months prior to conception                    | 7,473                  | 6,765,205                  | Ref                   | Ref                  | Ref                  |
| Use during the last 3 months prior to conception                       | 104                    | 61,555                     | 1.62(1.33-1.96)       | 1.54(1.27-1.88)      | 1.43(1.18-1.74)      |
| No use during the last 1 year prior to conception                      | 7,429                  | 6,736,654                  | Ref                   | Ref                  | Ref                  |
| Use only from the last 1 year to the last 3 months prior to conception | 71                     | 39,422                     | 1.71(1.35-2.16)       | 1.66(1.31-2.09)      | 1.54(1.21-1.94)      |
| Use only during the last 3 months prior to conception                  | 20                     | 14,738                     | 1.29(0.83-2.00)       | 1.24 (0.80-1.93)     | 1.17(0.75-1.82)      |
| Use both before and during the last 3 months prior to conception       | 57                     | 35,946                     | 1.52(1.17-1.97)       | 1.43(1.10-1.86)      | 1.32(1.02-1.72)      |

**Abbreviations:** AD, antidepressant drugs; SSRI, selective serotonin reuptake inhibitor; ASD, Autism Spectrum Disorder; No., number; HR, Hazard Ratio

<sup>a</sup> Adjusted for calendar year of birth, sex, parity, mother age, father age, maternal smoking, mother psychiatric history, maternal AD use during pregnancy

<sup>b</sup> Model 1 further adjusted for father psychiatric history

**Table 3. Association between paternal SSRIs use before conception and ASD in offspring born to fathers diagnosed with affective disorder or not**

| Paternal SSRIs use before conception                                   | Offspring with ASD no. | Follow-up no. of person-yr | Hazard Ratio (95% CI) |                      |                      |
|------------------------------------------------------------------------|------------------------|----------------------------|-----------------------|----------------------|----------------------|
|                                                                        |                        |                            | Crude                 | Model 1 <sup>a</sup> | Model 2 <sup>b</sup> |
| <b>Fathers with affective disorder</b>                                 |                        |                            |                       |                      |                      |
| No use during the last 3 months prior to conception                    | 58                     | 30,908                     | Ref                   | Ref                  | Ref                  |
| Use during the last 3 months prior to conception                       | 14                     | 6,625                      | 1.17(0.65-2.09)       | 1.10(0.61-1.98)      | 1.10(0.61-1.98)      |
| No use during the last 1 year prior to conception                      | 53                     | 28,033                     | Ref                   | Ref                  | Ref                  |
| Use only from the last 1 year to the last 3 months prior to conception | 8                      | 4,082                      | 1.07(0.51-2.25)       | 1.08(0.51-2.30)      | 1.08(0.51-2.30)      |
| Use only during the last 3 months prior to conception                  | 2                      | 1,164                      | 0.91(0.22-3.75)       | 0.89(0.21-3.75)      | 0.89(0.21-3.75)      |
| Use both before and during the last 3 months prior to conception       | 9                      | 4,254                      | 1.16(0.57-2.35)       | 1.10(0.55-2.22)      | 1.10(0.55-2.22)      |
| <b>Fathers without affective disorder</b>                              |                        |                            |                       |                      |                      |
| No use during the last 3 months prior to conception                    | 7,415                  | 6,752,899                  | Ref                   | Ref                  | Ref                  |
| Use during the last 3 months prior to conception                       | 90                     | 36,329                     | 1.57(1.27-1.93)       | 1.52(1.23-1.87)      | 1.45(1.18-1.79)      |
| No use during the last 1 year prior to conception                      | 7,376                  | 6,714,926                  | Ref                   | Ref                  | Ref                  |
| Use only from the last 1 year to the last 3 months prior to conception | 63                     | 37,973                     | 1.69(1.32-2.17)       | 1.64(1.28-2.11)      | 1.57(1.23-2.02)      |
| Use only during the last 3 months prior to conception                  | 18                     | 7,354                      | 1.26(0.79-2.00)       | 1.23(0.77-1.95)      | 1.19(0.75-1.88)      |
| Use both before and during the last 3 months prior to conception       | 48                     | 28,974                     | 1.45(1.09-1.93)       | 1.38(1.04-1.84)      | 1.32(0.99-1.76)      |

**Abbreviations:** AD, antidepressant drugs; SSRI, selective serotonin reuptake inhibitor; ASD, Autism Spectrum Disorder; No., number; HR, Hazard Ratio

<sup>a</sup> Adjusted for calendar year of birth, parity, mother age, father age, maternal smoking, mother psychiatric history, maternal AD use during pregnancy

<sup>b</sup> Model 1 further adjusted for father psychiatric history



**Table 4. Paternal SSRI use before pregnancy and ASD in exposed and unexposed siblings from 5,479 families**

| Paternal SSRIs use before conception                | Number of offspring no. | Offspring with ASD no. | Hazard Ratio (95% CI) |                      |
|-----------------------------------------------------|-------------------------|------------------------|-----------------------|----------------------|
|                                                     |                         |                        | Crude                 | Model 1 <sup>a</sup> |
| No use during the last 3 months prior to conception | 2,792                   | 45                     | Ref                   | Ref                  |
| Use during the last 3 months prior to conception    | 2,687                   | 23                     | 1.08(1.01-1.16)       | 1.04(0.94-1.14)      |

**Abbreviations:** AD, antidepressant drugs; SSRI, selective serotonin reuptake inhibitor; ASD, Autism Spectrum Disorder; No., number; HR, Hazard Ratio

<sup>a</sup> Adjusted for sex, parity, mother age, father age, maternal smoking, maternal AD use during pregnancy

**TablesS1. Association between paternal SSRIs use before conception and ASD in offspring: analyses stratified by gender**

| Paternal SSRIs use before conception                                   | Offspring with ASD no. | Follow-up no. of person-yr | Hazard Ratio (95% CI) |                      |                      |
|------------------------------------------------------------------------|------------------------|----------------------------|-----------------------|----------------------|----------------------|
|                                                                        |                        |                            | Crude                 | Model 1 <sup>a</sup> | Model 2 <sup>b</sup> |
| <b>Boys</b>                                                            |                        |                            |                       |                      |                      |
| No use during the last 3 months prior to conception                    | 6,005                  | 3,459,592                  | Ref                   | Ref                  | Ref                  |
| Use during the last 3 months prior to conception                       | 84                     | 31,642                     | 1.61(1.30-2.00)       | 1.55(1.25-1.92)      | 1.44(1.16-1.79)      |
| No use during the last 1 year prior to conception                      | 5,969                  | 3,444,956                  | Ref                   | Ref                  | Ref                  |
| Use only from the last 1 year to the last 3 months prior to conception | 58                     | 20,031                     | 1.74(1.34-2.25)       | 1.69(1.30-2.19)      | 1.58(1.22-2.05)      |
| Use only during the last 3 months prior to conception                  | 18                     | 7,622                      | 1.42(0.89-2.26)       | 1.39(0.87-2.21)      | 1.31(0.83-2.09)      |
| Use both before and during the last 3 months prior to conception       | 44                     | 18,623                     | 1.44 (1.07-1.93)      | 1.36(1.01-1.84)      | 1.26(0.94-1.71)      |
| <b>Girls</b>                                                           |                        |                            |                       |                      |                      |
| No use during the last 3 months prior to conception                    | 1,468                  | 3,305,613                  | Ref                   | Ref                  | Ref                  |
| Use during the last 3 months prior to conception                       | 20                     | 29,914                     | 1.63(1.05-2.53)       | 1.54(0.99-2.40)      | 1.41(0.90-2.20)      |
| No use during the last 1 year prior to conception                      | 1,460                  | 3,291,698                  | Ref                   | Ref                  | Ref                  |
| Use only from the last 1 year to the last 3 months prior to conception | 13                     | 19,390                     | 1.61(0.93-2.78)       | 1.53(0.88-2.64)      | 1.37(0.79-2.38)      |
| Use only during the last 3 months prior to conception                  | 2                      | 7,116                      | 0.67(0.17-2.69)       | 0.64(0.16-2.55)      | 0.59(0.15-2.36)      |
| Use both before and during the last 3 months prior to conception       | 13                     | 75,323                     | 1.84(1.06-3.17)       | 1.74(1.01-3.01)      | 1.59(0.92-2.75)      |

**Abbreviations:** AD, antidepressant drugs; SSRI, selective serotonin reuptake inhibitor; ASD, Autism Spectrum Disorder; No., number; HR, Hazard Ratio

<sup>a</sup> Adjusted for calendar year of birth, parity, mother age, father age, maternal smoking, mother psychiatric history, maternal AD use during pregnancy

<sup>b</sup> Model 1 further adjusted for father psychiatric history

**Table S2. Association between paternal SSRI use before conception and ASD in offspring born to mother who neither received antidepressant medication during pregnancy nor had affective disorders before birth of child**

| Paternal SSRIs use before conception                                   | Offspring with ASD no. | Follow-up no. of person-yr | Hazard Ratio (95% CI) |                      |                      |
|------------------------------------------------------------------------|------------------------|----------------------------|-----------------------|----------------------|----------------------|
|                                                                        |                        |                            | Crude                 | Model 1 <sup>a</sup> | Model 2 <sup>b</sup> |
| No use during the last 3 months prior to conception                    | 7,184                  | 6,627,720                  | Ref                   | Ref                  | Ref                  |
| Use during the last 3 months prior to conception                       | 91                     | 57,081                     | 1.55(1.26-1.91)       | 1.57(1.28-1.93)      | 1.45(1.18-1.79)      |
| No use during the last 1 year prior to conception                      | 7,144                  | 6,600,852                  | Ref                   | Ref                  | Ref                  |
| Use only from the last 1 year to the last 3 months prior to conception | 64                     | 37,032                     | 1.67(1.30-2.13)       | 1.68(1.31-2.15)      | 1.56(1.22-1.99)      |
| Use only during the last 3 months prior to conception                  | 16                     | 13,634                     | 1.13(0.69-1.85)       | 1.15(0.71-1.89)      | 1.08(0.66-1.77)      |
| Use both before and during the last 3 months prior to conception       | 51                     | 33,283                     | 1.50(1.13-1.97)       | 1.50(1.13-1.97)      | 1.38(1.05-1.82)      |

**Abbreviations:** AD, antidepressant drugs; SSRI, selective serotonin reuptake inhibitor; ASD, Autism Spectrum Disorder; No., number; HR, Hazard Ratio

<sup>a</sup> Adjusted for calendar year of birth, parity, mother age, father age, maternal smoking, mother psychiatric history

<sup>b</sup> Model 1 further adjusted for father psychiatric history

## STROBE Statement—checklist of items that should be included in reports of observational studies

|                              | Item No | Recommendation                                                                                                                                                                                                                                                                                                                                                                                                                                                         | Page No.       |
|------------------------------|---------|------------------------------------------------------------------------------------------------------------------------------------------------------------------------------------------------------------------------------------------------------------------------------------------------------------------------------------------------------------------------------------------------------------------------------------------------------------------------|----------------|
| <b>Title and abstract</b>    | 1       | (a) Indicate the study's design with a commonly used term in the title or the abstract                                                                                                                                                                                                                                                                                                                                                                                 | 2              |
|                              |         | (b) Provide in the abstract an informative and balanced summary of what was done and what was found                                                                                                                                                                                                                                                                                                                                                                    | 2-3            |
| <b>Introduction</b>          |         |                                                                                                                                                                                                                                                                                                                                                                                                                                                                        |                |
| Background/rationale         | 2       | Explain the scientific background and rationale for the investigation being reported                                                                                                                                                                                                                                                                                                                                                                                   | 4              |
| Objectives                   | 3       | State specific objectives, including any prespecified hypotheses                                                                                                                                                                                                                                                                                                                                                                                                       | 5              |
| <b>Methods</b>               |         |                                                                                                                                                                                                                                                                                                                                                                                                                                                                        |                |
| Study design                 | 4       | Present key elements of study design early in the paper                                                                                                                                                                                                                                                                                                                                                                                                                | 6              |
| Setting                      | 5       | Describe the setting, locations, and relevant dates, including periods of recruitment, exposure, follow-up, and data collection                                                                                                                                                                                                                                                                                                                                        | 6-8            |
| Participants                 | 6       | (a) <i>Cohort study</i> —Give the eligibility criteria, and the sources and methods of selection of participants. Describe methods of follow-up<br><i>Case-control study</i> —Give the eligibility criteria, and the sources and methods of case ascertainment and control selection. Give the rationale for the choice of cases and controls<br><i>Cross-sectional study</i> —Give the eligibility criteria, and the sources and methods of selection of participants | 6-8            |
|                              |         | (b) <i>Cohort study</i> —For matched studies, give matching criteria and number of exposed and unexposed<br><i>Case-control study</i> —For matched studies, give matching criteria and the number of controls per case                                                                                                                                                                                                                                                 |                |
| Variables                    | 7       | Clearly define all outcomes, exposures, predictors, potential confounders, and effect modifiers. Give diagnostic criteria, if applicable                                                                                                                                                                                                                                                                                                                               | 6-8            |
| Data sources/<br>measurement | 8*      | For each variable of interest, give sources of data and details of methods of assessment (measurement). Describe comparability of assessment methods if there is more than one group                                                                                                                                                                                                                                                                                   | 6-8            |
| Bias                         | 9       | Describe any efforts to address potential sources of bias                                                                                                                                                                                                                                                                                                                                                                                                              | 9-10           |
| Study size                   | 10      | Explain how the study size was arrived at                                                                                                                                                                                                                                                                                                                                                                                                                              | 10             |
| Quantitative<br>variables    | 11      | Explain how quantitative variables were handled in the analyses. If applicable, describe which groupings were chosen and why                                                                                                                                                                                                                                                                                                                                           | 9              |
| Statistical methods          | 12      | (a) Describe all statistical methods, including those used to control for confounding                                                                                                                                                                                                                                                                                                                                                                                  | 9-10           |
|                              |         | (b) Describe any methods used to examine subgroups and interactions                                                                                                                                                                                                                                                                                                                                                                                                    | 9              |
|                              |         | (c) Explain how missing data were addressed                                                                                                                                                                                                                                                                                                                                                                                                                            | 9              |
|                              |         | (d) <i>Cohort study</i> —If applicable, explain how loss to follow-up was addressed<br><i>Case-control study</i> —If applicable, explain how matching of cases and controls was addressed<br><i>Cross-sectional study</i> —If applicable, describe analytical methods taking account of sampling strategy                                                                                                                                                              | Not applicable |
|                              |         | (e) Describe any sensitivity analyses                                                                                                                                                                                                                                                                                                                                                                                                                                  | 9              |

| <b>Results</b>           |     |                                                                                                                                                                                                              |                |
|--------------------------|-----|--------------------------------------------------------------------------------------------------------------------------------------------------------------------------------------------------------------|----------------|
| Participants             | 13* | (a) Report numbers of individuals at each stage of study—eg numbers potentially eligible, examined for eligibility, confirmed eligible, included in the study, completing follow-up, and analysed            | 10             |
|                          |     | (b) Give reasons for non-participation at each stage                                                                                                                                                         | Not applicable |
|                          |     | (c) Consider use of a flow diagram                                                                                                                                                                           |                |
| Descriptive data         | 14* | (a) Give characteristics of study participants (eg demographic, clinical, social) and information on exposures and potential confounders                                                                     | 10             |
|                          |     | (b) Indicate number of participants with missing data for each variable of interest                                                                                                                          | 20             |
|                          |     | (c) <i>Cohort study</i> —Summarise follow-up time (eg, average and total amount)                                                                                                                             | 11             |
| Outcome data             | 15* | <i>Cohort study</i> —Report numbers of outcome events or summary measures over time                                                                                                                          | 10-11          |
|                          |     | <i>Case-control study</i> —Report numbers in each exposure category, or summary measures of exposure                                                                                                         |                |
|                          |     | <i>Cross-sectional study</i> —Report numbers of outcome events or summary measures                                                                                                                           |                |
| Main results             | 16  | (a) Give unadjusted estimates and, if applicable, confounder-adjusted estimates and their precision (eg, 95% confidence interval). Make clear which confounders were adjusted for and why they were included | 11             |
|                          |     | (b) Report category boundaries when continuous variables were categorized                                                                                                                                    | 19             |
|                          |     | (c) If relevant, consider translating estimates of relative risk into absolute risk for a meaningful time period                                                                                             | Not relevant   |
| Other analyses           | 17  | Report other analyses done—eg analyses of subgroups and interactions, and sensitivity analyses                                                                                                               | 11-12          |
| <b>Discussion</b>        |     |                                                                                                                                                                                                              |                |
| Key results              | 18  | Summarise key results with reference to study objectives                                                                                                                                                     | 12             |
| Limitations              | 19  | Discuss limitations of the study, taking into account sources of potential bias or imprecision. Discuss both direction and magnitude of any potential bias                                                   | 14-15          |
| Interpretation           | 20  | Give a cautious overall interpretation of results considering objectives, limitations, multiplicity of analyses, results from similar studies, and other relevant evidence                                   | 12-13          |
| Generalisability         | 21  | Discuss the generalisability (external validity) of the study results                                                                                                                                        | 14             |
| <b>Other information</b> |     |                                                                                                                                                                                                              |                |
| Funding                  | 22  | Give the source of funding and the role of the funders for the present study and, if applicable, for the original study on which the present article is based                                                | 15             |

\*Give information separately for cases and controls in case-control studies and, if applicable, for exposed and unexposed groups in cohort and cross-sectional studies.

**Note:** An Explanation and Elaboration article discusses each checklist item and gives methodological background and published examples of transparent reporting. The STROBE checklist is best used in conjunction with this article (freely available on the Web sites of PLoS Medicine at <http://www.plosmedicine.org/>, Annals of Internal Medicine at <http://www.annals.org/>, and Epidemiology at <http://www.epidem.com/>). Information on the STROBE Initiative is available at [www.strobe-statement.org](http://www.strobe-statement.org).

# BMJ Open

## Risk of autism spectrum disorder in offspring following paternal use of selective serotonin reuptake inhibitors before conception: a population-based cohort study

|                                 |                                                                                                                                                                                                                                                                                                                                                                                                                                                                                                                                                                                                                                                                                                                                                                                                                                                                                                                                                                                                                                                                                                                                                                                                        |
|---------------------------------|--------------------------------------------------------------------------------------------------------------------------------------------------------------------------------------------------------------------------------------------------------------------------------------------------------------------------------------------------------------------------------------------------------------------------------------------------------------------------------------------------------------------------------------------------------------------------------------------------------------------------------------------------------------------------------------------------------------------------------------------------------------------------------------------------------------------------------------------------------------------------------------------------------------------------------------------------------------------------------------------------------------------------------------------------------------------------------------------------------------------------------------------------------------------------------------------------------|
| Journal:                        | <i>BMJ Open</i>                                                                                                                                                                                                                                                                                                                                                                                                                                                                                                                                                                                                                                                                                                                                                                                                                                                                                                                                                                                                                                                                                                                                                                                        |
| Manuscript ID                   | bmjopen-2017-016368.R1                                                                                                                                                                                                                                                                                                                                                                                                                                                                                                                                                                                                                                                                                                                                                                                                                                                                                                                                                                                                                                                                                                                                                                                 |
| Article Type:                   | Research                                                                                                                                                                                                                                                                                                                                                                                                                                                                                                                                                                                                                                                                                                                                                                                                                                                                                                                                                                                                                                                                                                                                                                                               |
| Date Submitted by the Author:   | 19-May-2017                                                                                                                                                                                                                                                                                                                                                                                                                                                                                                                                                                                                                                                                                                                                                                                                                                                                                                                                                                                                                                                                                                                                                                                            |
| Complete List of Authors:       | <p>Yang, Fen; Shanghai Institute of Planned Parenthood Research, Department of Reproductive Epidemiology and Social Science; Aarhus Universitetshospital, Department of Clinical Epidemiology</p> <p>Chen, Jianping; Shanghai Institute of Planned Parenthood Research, Department of Reproductive Epidemiology and Social Science</p> <p>Miao, Mao-Hua; Shanghai Institute of Planned Parenthood Research, Department of Reproductive Epidemiology and Social Science, National Population and Family Planning Key Laboratory of Contraceptive Drugs and Devices</p> <p>Yuan, Wei; Shanghai Institute of Planned Parenthood Research, Reproductive Epidemiology, National Population and Family Planning Key Laboratory of Contraceptive Drugs and Devices</p> <p>Li, Lin; Shanghai Institute of Planned Parenthood Research</p> <p>Liang, Hong; Shanghai Institute of Planned Parenthood Research, Department of Reproductive Epidemiology and Social Science, National Population and Family Planning Key Laboratory of Contraceptive Drugs and Devices</p> <p>Ehrenstein, Vera; Aarhus Universitetshospital</p> <p>Li, Jiong; Aarhus Universitetshospital, Department of Clinical Epidemiology</p> |
| <b>Primary Subject Heading</b>: | Public health                                                                                                                                                                                                                                                                                                                                                                                                                                                                                                                                                                                                                                                                                                                                                                                                                                                                                                                                                                                                                                                                                                                                                                                          |
| Secondary Subject Heading:      | Mental health                                                                                                                                                                                                                                                                                                                                                                                                                                                                                                                                                                                                                                                                                                                                                                                                                                                                                                                                                                                                                                                                                                                                                                                          |
| Keywords:                       | MENTAL HEALTH, Child & adolescent psychiatry < PSYCHIATRY, Adult psychiatry < PSYCHIATRY, NEUROPATHOLOGY                                                                                                                                                                                                                                                                                                                                                                                                                                                                                                                                                                                                                                                                                                                                                                                                                                                                                                                                                                                                                                                                                               |
|                                 |                                                                                                                                                                                                                                                                                                                                                                                                                                                                                                                                                                                                                                                                                                                                                                                                                                                                                                                                                                                                                                                                                                                                                                                                        |

SCHOLARONE™  
Manuscripts

1  
2  
3 **Risk of autism spectrum disorder in offspring following paternal use of selective**  
4 **serotonin reuptake inhibitors before conception: a population-based cohort**  
5 **study**  
6  
7  
8  
9

10 Fen Yang<sup>1,2</sup>; Jianping Chen<sup>1</sup>; Maohua Miao<sup>1</sup>; Wei Yuan<sup>1</sup>; Lin Li<sup>1</sup>; Hong Liang<sup>1</sup>; Vera  
11 Ehrenstein<sup>2</sup>; Jiong Li<sup>2</sup>  
12  
13  
14  
15

16  
17  
18 **Author Affiliation**  
19

20 <sup>1</sup>Key Lab. of Reproduction Regulation of NPFPC, SIPPR, IRD, Fudan University,  
21 Shanghai, 200032, China  
22  
23

24 <sup>2</sup>Department of Clinical Epidemiology, Aarhus University Hospital, Olof Palmes Alle  
25 43-45, DK-8200 Aarhus N, Denmark  
26  
27  
28  
29

30  
31  
32  
33 **Corresponding Author**  
34

35 Hong Liang, MD, PhD  
36

37 Key Lab. of Reproduction Regulation of NPFPC, SIPPR, IRD, Fudan University,  
38 #779 Lao Hu Min Road, Shanghai, 200032, China.  
39  
40

41 Email: [lucylhcn@163.com](mailto:lucylhcn@163.com);  
42

43 Phone number: 86 -21-64771683  
44  
45  
46  
47  
48  
49  
50  
51  
52  
53  
54  
55  
56  
57  
58  
59  
60

## Abstract

### Objective

The present study aimed to examine the association between paternal selective serotonin reuptake inhibitors (SSRIs) use before conception and the risk of autism spectrum disorder (ASD) in offspring.

### Design

A population-based cohort study

### Methods

Based on Danish national registers, we conducted a cohort study of 669,922 children born from 1998 to 2008, with follow-up throughout 2013. The children whose fathers used SSRIs during the last 3 months prior to conception were identified as the exposed. Cox regression model was used to estimate the hazard ratio (HR) for ASD in children.

### Results

Compared with unexposed children, the exposed had a 1.43-fold higher risk of ASD (HR=1.43, 95% confidence interval [CI]: 1.18-1.74) after adjusting for potential confounders. When extending the exposure window to 1 year before conception, the adjusted HR (aHR) of ASD in children of fathers who used SSRIs only from the last year till the last 3 months prior to conception and who used SSRIs both before and during the last 3 months prior to conception was 1.54 (95%CI: 1.21-1.94) and 1.32 (95%CI: 1.02-1.72), respectively. Whereas, the risk in children of fathers who used SSRIs only during the last 3 months prior to conception decreased and became



nonsignificant (aHR=1.17, 95%CI: 0.75-1.82).

## Conclusions

The increased risk of ASD in the offspring associated with paternal SSRIs use before conception may be attributable to the underlying indications.

### Strengths and limitations of this study

- This is the very first study that investigates the link between paternal antidepressants use and ASD risk in children.
- A number of potential confounders, including sociodemographic factors as well as parental psychiatric history, can be adjusted for based on the availability of national health registry data.
- Actual use of SSRIs by fathers during the time period of interest may not be validated.
- Those children who received the diagnosis of ASD from private psychiatrists or remained undiagnosed at the end of the follow-up may not be identified as ASD case.

## Introduction

Depression is a common mental health problem that affects approximately 350 million people worldwide<sup>1</sup>. Selective serotonin reuptake inhibitors (SSRIs) are commonly prescribed for the treatment of depression and other anxiety-related disorders. However, an increasing body of evidence suggests that prenatal exposure to SSRIs is associated with adverse obstetrical and neonatal outcomes<sup>2-5</sup>. In addition, recent studies have indicated a possible link between prenatal SSRIs exposure and neurobehavioral problems in children<sup>2, 6-10</sup>, which may be due to the biological mechanisms (i.e. dysfunctional serotonin signaling)<sup>11</sup>. Whereas several studies have suggested that the previously observed association between prenatal SSRIs exposure and neurodevelopmental diseases might be due to confounding by related indications<sup>12-15</sup>.

Autism spectrum disorder (ASD) is one of the major neurodevelopmental disorders characterized by impairments in reciprocal social interaction, communication, and repetitive or stereotypic behavior<sup>16</sup>. The estimated prevalence of ASD has dramatically increased from less than 1 in 2,000 children in 1960s to approximately 1 in 145 children today<sup>17, 18</sup>. Both genetic and environmental risk factors may contribute to ASD<sup>19</sup>. Recently, maternal use of SSRIs during pregnancy has been reported to be associated with an increased risk of ASD in children<sup>10, 20-23</sup>.

If maternal SSRIs exposure during pregnancy plays a role in fetal, even in child's, development, an extended effect of earlier exposure on gamete, particularly human sperm, is biologically plausible. Therefore, the potential role of paternal SSRIs use in

1  
2  
3 ASD should also be taken into consideration. Studies in the Nordic countries show  
4  
5 that one-third of the fathers used prescription drugs during the last 6 months prior to  
6  
7 conception<sup>24</sup>, and approximately 1.4% of fathers were dispensed SSRIs during the  
8  
9 last 3 months prior to conception<sup>25, 26</sup>. Although the information regarding the  
10  
11 potential effects of SSRI use by fathers is limited, the hypothesis of an increased risk  
12  
13 of adverse pregnancy or neonatal outcome associated with paternal drug exposure is  
14  
15 not new. Evidence from experimental studies suggests that paternal exposure to a  
16  
17 broad range of xenobiotic agents may induce reproductive and developmental  
18  
19 abnormalities in the subsequent offspring, e.g., spontaneous abortions, congenital  
20  
21 malformations, growth retardation, neurobehavioral deficits, or carcinogenesis<sup>27-29</sup>.  
22  
23 Epidemiologic studies have also shown that certain pharmacological agents used by  
24  
25 fathers before conception may increase the risk of spontaneous abortions, birth defects  
26  
27 or childhood cancers<sup>30,31</sup>. The potential mechanisms behind the male-mediated effects  
28  
29 include: 1) genetic or epigenetic changes with direct disturbances in spermatocytes; 2)  
30  
31 indirect effects by transmission of the xenobiotic agents to the female via the seminal  
32  
33 fluid<sup>27, 28</sup>. Several studies have indicated the adverse effects of paternal SSRIs use,  
34  
35 including impaired semen quality and abnormal sperm DNA fragmentation<sup>32, 33</sup>,  
36  
37 which has been reported to be associated with diminished fertility, adverse pregnancy  
38  
39 outcomes, and an increased risk of childhood disease<sup>34</sup>.  
40  
41  
42  
43  
44  
45  
46  
47  
48  
49

50 Little is known on whether paternal SSRIs use before conception contributes to  
51  
52 the risk of ASD in offspring. We conducted a population-based cohort study to  
53  
54 examine the association between paternal SSRIs use during the last 3 months prior to  
55  
56  
57  
58  
59  
60

1  
2  
3 conception and risk of ASD in offspring, utilizing data from national Danish health  
4 registries.  
5  
6  
7  
8  
9

## 10 **Methods**

### 11 **Study Population**

12  
13  
14 This study was based on several national registers in Denmark. Each Danish resident  
15 is assigned a unique personal identification number (a 10-digit civil registration  
16 system number used in all registries), which enables accurate linkage of national  
17 registries at the individual level<sup>35</sup>. The Danish Medical Birth Registry (DMBR)  
18 contains records of all deliveries in Denmark since 1973 and includes information  
19 about gestational age at birth from 1978<sup>36</sup>. Using the DMBR data, we identified a  
20 cohort of all singletons born alive in Denmark during the period of January 1, 1998  
21 through December 31, 2008 (n=687,580). We excluded children without linkage to  
22 their father (n=16,955) or their mother (n=74), with missing parity (n=208), and with  
23 missing or extreme values of gestational age ( $\leq 23$  weeks or  $\geq 45$  weeks, n=421). A  
24 total of 669,922 children were included in the analysis.  
25  
26  
27  
28  
29  
30  
31  
32  
33  
34  
35  
36  
37  
38  
39  
40  
41  
42

### 43 **Data on SSRIs use**

44  
45 Information on SSRIs use was drawn from the Danish National Prescription Registry  
46 (DNPR)<sup>37</sup>. Since 1995, this registry has recorded all redeemed prescriptions in  
47 Denmark with the following information: the civil registration number of the patient,  
48 the dispensing date, the medication code (the WHO Anatomical Therapeutic Chemical  
49 (ATC) classification system), the number of packages prescribed, and the number of  
50  
51  
52  
53  
54  
55  
56  
57  
58  
59  
60

1  
2  
3 doses units in package. Selective serotonin reuptake inhibitors use was identified  
4 based on ATC codes: fluoxetine (N06AB03), citalopram (N06AB04), paroxetine  
5 (N06AB05), sertraline (N06AB06), fluvoxamine (N06AB08), and escitalopram  
6 (N06AB10). It is estimated that spermatogenesis takes approximately 74 days<sup>30</sup>,  
7 therefore we chose the last 3 months prior to conception as the exposure window to  
8 cover the susceptible time period. A child was considered exposed if the dispensing  
9 date fell within the specified exposure window or the number of days for which the  
10 SSRIs medication was supplied overlapped any portion of the exposure window.  
11 Children born to fathers who had no prescriptions for SSRIs and no supply overlap  
12 during the entire exposure window were considered unexposed. The date of  
13 conception was estimated by subtracting gestational age from the date of delivery.  
14 Data on paternal SSRIs use during the last two years prior to the conception were  
15 extracted for further analyses. We also retrieved the information about maternal SSRIs  
16 use during the pregnancy.

### 17 **Autism spectrum disorders**

18 Autism spectrum disorders in children were identified by using the Danish Psychiatric  
19 Central Research Register (DPCRR) and the Danish National Patient Register  
20 (DNPR). The DPCRR contains diagnostic information on every admission from  
21 psychiatric hospitals and psychiatric wards in general hospitals in Denmark since  
22 1969, and includes data on all outpatient visits and emergency room contacts since  
23 1995<sup>38</sup>. The DNPR has collected data on all inpatients from all somatic hospitals in  
24 Denmark since 1977 and outpatients from 1995<sup>39</sup>. The combined data from the two

registries were used to identify all children diagnosed with ASD. During the study period, the diagnosis of ASD was based on the International Classification of Diseases, 10th version (ICD-10) codes of F84.0 (Childhood autism), F84.1 (Atypical autism), F84.5 (Asperger syndrome), F84.8 (other pervasive developmental disorders) and F84.9 (unspecified pervasive developmental disorders). The quality of the childhood autism diagnosis has been validated and the diagnoses could be verified in 94% of the children with a record in the DPCRR<sup>40</sup>. Children were followed up from birth till first diagnosis of ASD, death, emigration, or December 31, 2013, whichever came first.

### **Covariates**

Using the Danish nationwide health registers, we retrieved data on characteristics that may be associated with offspring ASD or paternal SSRIs use. For each child, we obtained information on calendar year of birth, gender of the child, birth weight, Apgar score at 5 minutes, gestational age, maternal parity, maternal age at child birth, paternal age at child birth and maternal smoking status during pregnancy from the DMBR. Parents' psychiatric history prior to birth of the index child was obtained from DPCRR by ICD-8 codes 290-315 from 1977 to 1993 and ICD-10 codes F00-F99 from 1994 onward. Furthermore, we identified parents diagnosed with affective disorders before birth of child (specifically, ICD-8 codes 296.09, 296.19, 296.29, 296.39, 296.99, 298.09, 298.19, 300.49, and 301.19, and ICD-10 codes F30–F34 and F38–F39) using the DPCRR.

### **Statistical Analysis**

1  
2  
3  
4 Cox proportional-hazards regression models were used to estimate the hazard ratios  
5  
6 (HRs) and 95% confidence intervals (CIs) of ASD in children following exposure to  
7  
8 paternal SSRIs use before conception.  
9

10  
11 We adjusted for variables as following: the calendar year of birth (1998-2000,  
12  
13 2001-2003, 2004-2006, 2007-2008), gender of the child (boy, girl), parity (1, 2,  $\geq 3$ ),  
14  
15 parental age at child birth ( $\leq 25$ , 26-30, 31-35, and  $> 35$  years), maternal smoking  
16  
17 status during pregnancy (yes or no), maternal history of psychiatric disorders before  
18  
19 birth of child (yes or no), maternal antidepressants use during pregnancy (yes or no)  
20  
21 in model 1. We additionally adjusted for paternal history of psychiatric disorders  
22  
23 before birth of child (yes or no) in model 2. Models were also run with the exclusion  
24  
25 of those children with missing data for covariates.  
26  
27  
28  
29

30  
31 To distinguish the direct effects of SSRIs use from the effects of the indication of  
32  
33 SSRIs use, we extended the exposure window to 1 year before conception. We then  
34  
35 re-categorized the exposed children into three subgroups: children of fathers who used  
36  
37 SSRIs 1) only from the last year till the last 3 months prior to conception (former  
38  
39 users); 2) only during the last 3 months prior to conception (current short-term users,  
40  
41 hereinafter referred to as 'current users'); 3) both before and during the last 3 months  
42  
43 prior to conception (both former and current users). The reference group consisted of  
44  
45 those children born to fathers who never used SSRIs medication through the last year  
46  
47 before conception.  
48  
49  
50  
51

52  
53 The stratified analysis was performed to examine whether the association between  
54  
55 paternal SSRIs use and ASD in children differed by gender. We also restricted the  
56  
57  
58  
59

1  
2  
3 analyses to children whose mothers neither received antidepressant medication during  
4 pregnancy nor had affective disorder before birth of child. To further distinguish the  
5 effect of SSRIs medication from that of the main indication (i.e., affective disorders)  
6 for SSRIs treatment, we performed stratified analyses according to paternal history of  
7 affective disorder before birth of the index child. As for those children born to fathers  
8 with affective disorders, the ASD risk we examined could be solely attributable to  
9 paternal SSRIs use since both of the exposed children and the reference children were  
10 with paternal affective disorders.  
11  
12  
13  
14  
15  
16  
17  
18  
19  
20  
21  
22

23 Besides, to control for unmeasured family-related confounding factors, we  
24 re-conducted a sibling study by restricting to families with more than one child and  
25 with at least one child with paternal SSRIs preconception exposure. Using the  
26 stratified Cox proportional-hazards regression, we then compared exposed siblings to  
27 unexposed siblings to estimate the association between paternal SSRIs use before  
28 conception and ASD in children.  
29  
30  
31  
32  
33  
34  
35  
36

37 All analyses were performed using SAS version 9.1 (SAS Institute Inc, Cary,  
38 North Carolina, USA).  
39  
40  
41

## 42 **Results**

43  
44 Among the 669,922 singletons included in the study, 6,870 (1.03%) children were  
45 born to fathers who had redeemed a prescription for SSRIs during the last 3 months  
46 prior to conception. During the study period, a total of 7,577 children were diagnosed  
47 with ASD. The median age at diagnosis of ASD was 6.77 years (interquartile range:  
48 4.84 to 9.48 years). Characteristics of the study population are shown in Table 1.  
49  
50  
51  
52  
53  
54  
55  
56



1  
2  
3 Compared with the unexposed group, there were a higher proportion of exposed  
4 children born in later calendar years. Fathers in exposed group were more likely to be  
5  
6 older at child birth and to have a history of psychiatric disorder (including affective  
7  
8 disorder) before birth of child. Mothers of exposed children were characterized as  
9  
10 having higher parity, being more likely to be older at child birth, to use  
11  
12 antidepressants during pregnancy, and to have a history of psychiatric disorder before  
13  
14 birth of child.  
15  
16  
17  
18  
19

20  
21 Among 61,555 person-years of follow-up, we identified 104 cases of ASD in  
22  
23 children born to fathers who used SSRIs during the last 3 months prior to conception  
24  
25 (incidence rate: 169 per 100,000 person-years). This incidence rate corresponded to a  
26  
27 62% increased risk of ASD compared with the unexposed group (Table 2). The  
28  
29 adjusted HR (aHR) of ASD was 1.54 (95% CI: 1.27-1.88) after adjusting for potential  
30  
31 confounders in model 1. After paternal psychiatric history was further adjusted for in  
32  
33 model 2, the estimate was 1.43 (95%CI: 1.18-1.74). When extending the exposure  
34  
35 window to the last one year prior to conception, after the full adjustment, the HR for  
36  
37 ASD in children of fathers who were former users only and who were both former  
38  
39 and current users was 1.54 (95%CI: 1.21-1.94) and 1.32 (95%CI: 1.02-1.72),  
40  
41  
42 respectively. However, the increased risk decreased and became nonsignificant among  
43  
44 children of fathers who were only current users (aHR=1.17, 95%CI: 0.75-1.82, model  
45  
46  
47  
48  
49 2, table2).  
50  
51

52 The risk estimates of ASD were similar for both boys and girls, regardless of the  
53  
54 exposure (Table S1). When we restricted analyses to children whose mothers neither  
55  
56  
57  
58  
59

1  
2  
3 used SSRIs during pregnancy nor had affective disorder before birth of child, the  
4  
5  
6 results did not change essentially (Table S2).  
7

8  
9 When the analyses were stratified by paternal affective disorder before birth of the  
10  
11 index child, in children born to fathers with a history of affective disorder, there was  
12  
13 no association between paternal SSRIs use before conception and ASD in the  
14  
15 offspring (model 2: aHR=1.10, 95%CI: 0.61-1.98). For children whose father without  
16  
17 affective disorder, the patterns of associations remained similar to those of the main  
18  
19 analyses (Table 3).  
20  
21

22  
23 In the sibling analysis, we identified 5,479 families with more than one child and  
24  
25 with at least one child with paternal SSRIs use before conception (Table 4). The risk  
26  
27 of ASD in exposed children was similar when compared with their unexposed siblings  
28  
29 (aHR=1.04, 95%CI: 0.94-1.14).  
30  
31

### 32 33 **Discussion**

34  
35 In this large population-based cohort study, we observed an increased risk of ASD in  
36  
37 the offspring following paternal use of SSRIs during the last 3 months prior to  
38  
39 conception. However, the risk attenuated after adjusting for a number of potential  
40  
41 confounders, especially fathers' psychiatric conditions. When extending the exposure  
42  
43 window to one year before conception, the ASD risk persisted among children born to  
44  
45 former users but not current users. In addition, among children born to father with  
46  
47 affective disorder, no association was observed. Finally, we performed a sibling  
48  
49 analysis which allowed for better control of unmeasured familial confounding and no  
50  
51 difference in the ASD risk was found among exposed children and their unexposed  
52  
53  
54  
55  
56  
57  
58  
59  
60

1  
2  
3 siblings. Taken as a whole, our results did not support that paternal SSRIs use before  
4  
5  
6 conception could increase the risk of ASD in children.  
7

8  
9  
10 Recently, concerns have been raised regarding the risk of ASD in the offspring  
11 associated with prenatal exposure to SSRIs. Three previous human studies have  
12 suggested that in utero exposure to antidepressants would increase the risk of ASD in  
13 children<sup>21-23</sup>, although another two studies using the Danish registers have reported no  
14  
15 significant association<sup>41,42</sup>. Basic neuro-biologic studies have showed that prenatal  
16  
17 SSRIs administration may be part of a causal pathway to ASD by operating directly  
18  
19 on the developing brain<sup>43,44</sup>. Considering the detrimental effect of SSRIs on sperm<sup>32,</sup>  
20  
21  
22  
23  
24  
25  
26  
27  
28  
29  
30  
31  
32  
33  
34  
35  
36  
37  
38  
39  
40  
41  
42  
43  
44  
45  
46  
47  
48  
49  
50  
51  
52  
53  
54  
55  
56  
57  
58  
59  
60  
61  
62  
63  
64  
65  
66  
67  
68  
69  
70  
71  
72  
73  
74  
75  
76  
77  
78  
79  
80  
81  
82  
83  
84  
85  
86  
87  
88  
89  
90  
91  
92  
93  
94  
95  
96  
97  
98  
99  
100  
101  
102  
103  
104  
105  
106  
107  
108  
109  
110  
111  
112  
113  
114  
115  
116  
117  
118  
119  
120  
121  
122  
123  
124  
125  
126  
127  
128  
129  
130  
131  
132  
133  
134  
135  
136  
137  
138  
139  
140  
141  
142  
143  
144  
145  
146  
147  
148  
149  
150  
151  
152  
153  
154  
155  
156  
157  
158  
159  
160  
161  
162  
163  
164  
165  
166  
167  
168  
169  
170  
171  
172  
173  
174  
175  
176  
177  
178  
179  
180  
181  
182  
183  
184  
185  
186  
187  
188  
189  
190  
191  
192  
193  
194  
195  
196  
197  
198  
199  
200  
201  
202  
203  
204  
205  
206  
207  
208  
209  
210  
211  
212  
213  
214  
215  
216  
217  
218  
219  
220  
221  
222  
223  
224  
225  
226  
227  
228  
229  
230  
231  
232  
233  
234  
235  
236  
237  
238  
239  
240  
241  
242  
243  
244  
245  
246  
247  
248  
249  
250  
251  
252  
253  
254  
255  
256  
257  
258  
259  
260  
261  
262  
263  
264  
265  
266  
267  
268  
269  
270  
271  
272  
273  
274  
275  
276  
277  
278  
279  
280  
281  
282  
283  
284  
285  
286  
287  
288  
289  
290  
291  
292  
293  
294  
295  
296  
297  
298  
299  
300  
301  
302  
303  
304  
305  
306  
307  
308  
309  
310  
311  
312  
313  
314  
315  
316  
317  
318  
319  
320  
321  
322  
323  
324  
325  
326  
327  
328  
329  
330  
331  
332  
333  
334  
335  
336  
337  
338  
339  
340  
341  
342  
343  
344  
345  
346  
347  
348  
349  
350  
351  
352  
353  
354  
355  
356  
357  
358  
359  
360  
361  
362  
363  
364  
365  
366  
367  
368  
369  
370  
371  
372  
373  
374  
375  
376  
377  
378  
379  
380  
381  
382  
383  
384  
385  
386  
387  
388  
389  
390  
391  
392  
393  
394  
395  
396  
397  
398  
399  
400  
401  
402  
403  
404  
405  
406  
407  
408  
409  
410  
411  
412  
413  
414  
415  
416  
417  
418  
419  
420  
421  
422  
423  
424  
425  
426  
427  
428  
429  
430  
431  
432  
433  
434  
435  
436  
437  
438  
439  
440  
441  
442  
443  
444  
445  
446  
447  
448  
449  
450  
451  
452  
453  
454  
455  
456  
457  
458  
459  
460  
461  
462  
463  
464  
465  
466  
467  
468  
469  
470  
471  
472  
473  
474  
475  
476  
477  
478  
479  
480  
481  
482  
483  
484  
485  
486  
487  
488  
489  
490  
491  
492  
493  
494  
495  
496  
497  
498  
499  
500  
501  
502  
503  
504  
505  
506  
507  
508  
509  
510  
511  
512  
513  
514  
515  
516  
517  
518  
519  
520  
521  
522  
523  
524  
525  
526  
527  
528  
529  
530  
531  
532  
533  
534  
535  
536  
537  
538  
539  
540  
541  
542  
543  
544  
545  
546  
547  
548  
549  
550  
551  
552  
553  
554  
555  
556  
557  
558  
559  
560  
561  
562  
563  
564  
565  
566  
567  
568  
569  
570  
571  
572  
573  
574  
575  
576  
577  
578  
579  
580  
581  
582  
583  
584  
585  
586  
587  
588  
589  
590  
591  
592  
593  
594  
595  
596  
597  
598  
599  
600  
601  
602  
603  
604  
605  
606  
607  
608  
609  
610  
611  
612  
613  
614  
615  
616  
617  
618  
619  
620  
621  
622  
623  
624  
625  
626  
627  
628  
629  
630  
631  
632  
633  
634  
635  
636  
637  
638  
639  
640  
641  
642  
643  
644  
645  
646  
647  
648  
649  
650  
651  
652  
653  
654  
655  
656  
657  
658  
659  
660  
661  
662  
663  
664  
665  
666  
667  
668  
669  
670  
671  
672  
673  
674  
675  
676  
677  
678  
679  
680  
681  
682  
683  
684  
685  
686  
687  
688  
689  
690  
691  
692  
693  
694  
695  
696  
697  
698  
699  
700  
701  
702  
703  
704  
705  
706  
707  
708  
709  
710  
711  
712  
713  
714  
715  
716  
717  
718  
719  
720  
721  
722  
723  
724  
725  
726  
727  
728  
729  
730  
731  
732  
733  
734  
735  
736  
737  
738  
739  
740  
741  
742  
743  
744  
745  
746  
747  
748  
749  
750  
751  
752  
753  
754  
755  
756  
757  
758  
759  
760  
761  
762  
763  
764  
765  
766  
767  
768  
769  
770  
771  
772  
773  
774  
775  
776  
777  
778  
779  
780  
781  
782  
783  
784  
785  
786  
787  
788  
789  
790  
791  
792  
793  
794  
795  
796  
797  
798  
799  
800  
801  
802  
803  
804  
805  
806  
807  
808  
809  
810  
811  
812  
813  
814  
815  
816  
817  
818  
819  
820  
821  
822  
823  
824  
825  
826  
827  
828  
829  
830  
831  
832  
833  
834  
835  
836  
837  
838  
839  
840  
841  
842  
843  
844  
845  
846  
847  
848  
849  
850  
851  
852  
853  
854  
855  
856  
857  
858  
859  
860  
861  
862  
863  
864  
865  
866  
867  
868  
869  
870  
871  
872  
873  
874  
875  
876  
877  
878  
879  
880  
881  
882  
883  
884  
885  
886  
887  
888  
889  
890  
891  
892  
893  
894  
895  
896  
897  
898  
899  
900  
901  
902  
903  
904  
905  
906  
907  
908  
909  
910  
911  
912  
913  
914  
915  
916  
917  
918  
919  
920  
921  
922  
923  
924  
925  
926  
927  
928  
929  
930  
931  
932  
933  
934  
935  
936  
937  
938  
939  
940  
941  
942  
943  
944  
945  
946  
947  
948  
949  
950  
951  
952  
953  
954  
955  
956  
957  
958  
959  
960  
961  
962  
963  
964  
965  
966  
967  
968  
969  
970  
971  
972  
973  
974  
975  
976  
977  
978  
979  
980  
981  
982  
983  
984  
985  
986  
987  
988  
989  
990  
991  
992  
993  
994  
995  
996  
997  
998  
999  
1000

Recently, concerns have been raised regarding the risk of ASD in the offspring associated with prenatal exposure to SSRIs. Three previous human studies have suggested that in utero exposure to antidepressants would increase the risk of ASD in children<sup>21-23</sup>, although another two studies using the Danish registers have reported no significant association<sup>41,42</sup>. Basic neuro-biologic studies have showed that prenatal SSRIs administration may be part of a causal pathway to ASD by operating directly on the developing brain<sup>43,44</sup>. Considering the detrimental effect of SSRIs on sperm<sup>32, 33, 45</sup>, paternal SSRIs use before conception may also cause adverse effects on pregnancy outcomes. However, till now, only one study have suggested that SSRIs administration to male rats could induce deterioration in fertility and fetal outcomes (including weight gain, organ weights and feed consumption)<sup>46</sup>. To our knowledge, our study is the first to investigate the link between paternal antidepressants use and ASD risk in children. Considering the limited number of ASD cases and the challenges posed by confounding, further studies are needed to corroborate the findings.

In the present study, the increased risk of ASD observed in former users but not in current users implied that indications for paternal SSRIs use may account for the observed association between paternal SSRIs use and ASD in children, which was supported by previous studies suggesting that parental depression and other psychiatric disorders might be associated with the risk of autism in children<sup>47-49</sup>. In

1  
2  
3 children born to fathers without affective disorders, there was an increased risk  
4  
5 associated with paternal SSRIs use. Most fathers might receive SSRIs treatment from  
6  
7 their general practitioner and were therefore not registered with a diagnosis of  
8  
9 affective disorders in the hospital system. Therefore, it was possible that the increased  
10  
11 risk associated with prenatal SSRIs use was partly confounded by paternal affective  
12  
13 disorders diagnosed outside a hospital department for which we were not able to  
14  
15 adjust. In addition, other psychiatric diseases related to SSRIs use might also  
16  
17 contribute to the observed association.  
18  
19  
20  
21  
22

23 Our study has several methodological strengths. One strength was that the linkage  
24  
25 of several nationwide health registries in Denmark enabled us to conduct a large  
26  
27 cohort study with virtually complete follow-up. The definition on exposure to SSRIs  
28  
29 was based on a national registry, which eliminated the risk of recall bias caused by  
30  
31 self-report. Another strength was that the information on ASD diagnosis was obtained  
32  
33 independently of exposure measurement, which could also mitigate the information  
34  
35 bias. Furthermore, the availability of health registry data enabled us to adjust for a  
36  
37 number of potential confounders including sociodemographic factors as well as  
38  
39 parental psychiatric history.  
40  
41  
42  
43  
44

45 Limitations need to be considered when interpreting the results of our study.  
46  
47 Firstly, we were unable to validate actual use of SSRIs by fathers during the time  
48  
49 period of interest because we relied on medical records of dispensed prescriptions.  
50  
51 This may lead to misclassification of exposure status because some people may not  
52  
53 take the medication or may take it later. Nevertheless, the misclassification was most  
54  
55  
56  
57  
58  
59  
60

1  
2  
3 likely non-differential, which could bias the association toward null. Besides, some  
4  
5 patients may receive SSRIs treatment during inpatient admissions which are not  
6  
7 included in the prescription registry. We expect this problem to be minor since those  
8  
9 inpatients usually have severe psychiatric disorders and are more likely to continue  
10  
11 treatment after discharge. Secondly, the 3-month cut-off point was set based on the  
12  
13 fact that spermatogenesis takes approximately 70-90 days in humans. Whereas it may  
14  
15 be possible that SSRIs drugs induce sperm damage at the very primitive stage.  
16  
17 However, the results did not change markedly after extending the putative exposure  
18  
19 period to the last 6 months prior to conception (data not shown). Thirdly, ASD in  
20  
21 children was ascertained through the DNPR and the DPCRR, which did not include  
22  
23 those children who received the diagnosis of ASD from private psychiatrists or  
24  
25 remained undiagnosed at the end of the follow-up. However, the prevalence of ASD  
26  
27 in our cohort was 1.13%, which was similar to that reported in the United States  
28  
29 during the study period (1.14%)<sup>50</sup>. Hence the bias introduced by case identification  
30  
31 was expected to be minimal.  
32  
33  
34  
35  
36  
37  
38  
39

## 40 **Conclusions**

41  
42 In the study, paternal SSRI use before conception was associated with an increased  
43  
44 risk of ASD in the offspring, especially in the former users who took SSRIs over the  
45  
46 longer term. However, null association were observed in exposed children with  
47  
48 paternal affective disorders, and similar ASD risk were observed among exposed and  
49  
50 unexposed siblings, which implicates that paternal underlying indications related to  
51  
52 SSRIs use or other unmeasured confounding factors may explain the increased risk.  
53  
54  
55  
56  
57  
58  
59  
60

**Footnotes**

This cohort study was approved by the Danish Data Protection Agency (Document No. 2013-41-2569).

**Contributors:** HL had full access to all the data in the study and took responsibility for the integrity of the data and the accuracy of the data analysis. HL, WY and JL conceptualized and designed the study. FY conducted the statistical analysis. HL, PC and FY interpreted the results and FY drafted the initial manuscript. All authors reviewed the manuscript and approved the final version.

**Funding:** The study was supported by the National Natural Science Foundation of China (81428011), the National Key Research and Development Program of China (2016YFC1000505), the European Research Council (ERC-2010-StG-260242-PROGEURO), Nordic Cancer Union (176673,186200), Danish Council for Independent Research (DFR-6110-00019), Karen Elise Jensens Fond (2016), and the Program for Clinical Research Infrastructure (PROCRIN) established by the Lundbeck Foundation and the Novo Nordisk Foundation.

**Competing interests:** The authors declare that they have no conflict of interest.

**Statement of the independence of researchers from funders:** The funding sources had no role in the design and conduct of the study; collection, management, analysis, and interpretation of the data; and preparation, review, or approval of the manuscript; and decision to submit the manuscript for publication. The researchers were independent from the funders.

**Ethical approval:** The study was based on secondary data. No individuals were approached as a result of the study, nor did we access any other data from the

1  
2  
3 participants. This study was approved by the Danish Data Protection Agency  
4  
5  
6 (Document No. 2013-41-2569). All procedures performed in the study involving  
7  
8 human participants were in accordance with the ethical standards of the institutional  
9  
10 and/or national research committee and with the 1964 Helsinki declaration and its  
11  
12 later amendments or comparable ethical standards. For this type of study formal  
13  
14 consent is not required.  
15  
16

17  
18 **Data sharing statement:** No additional data are available.  
19

## 20 21 Reference

- 22 1. Organization WH. Depression [fact sheet no. 369]. 2012. As of September. 2015;30.
- 23 2. Alwan S, Friedman JM, Chambers C. Safety of selective serotonin reuptake inhibitors in  
24 pregnancy: a review of current evidence. *CNS drugs*. 2016;30(6):499-515.
- 25 3. Wen SW, Yang Q, Garner P, et al. Selective serotonin reuptake inhibitors and adverse pregnancy  
26 outcomes. *American journal of obstetrics and gynecology*. 2006;194(4):961-966.
- 27 4. Lund N, Pedersen LH, Henriksen TB. Selective serotonin reuptake inhibitor exposure in utero and  
28 pregnancy outcomes. *Archives of pediatrics & adolescent medicine*. 2009;163(10):949-954.
- 29 5. Pedersen LH, Henriksen TB, Vestergaard M, et al. Selective serotonin reuptake inhibitors in  
30 pregnancy and congenital malformations: population based cohort study. *Bmj*. 2009;339:b3569.
- 31 6. Oberlander TF, Reebye P, Misri S, et al. Externalizing and attentional behaviors in children of  
32 depressed mothers treated with a selective serotonin reuptake inhibitor antidepressant during  
33 pregnancy. *Archives of pediatrics & adolescent medicine*. 2007;161(1):22-29.
- 34 7. Nulman I, Koren G, Rovet J, et al. Neurodevelopment of children following prenatal exposure to  
35 venlafaxine, selective serotonin reuptake inhibitors, or untreated maternal depression. *American  
36 Journal of Psychiatry*. 2012;169(11):1165-1174.
- 37 8. Healy D, Le Noury J, Mangin D. Links between serotonin reuptake inhibition during pregnancy  
38 and neurodevelopmental delay/spectrum disorders: A systematic review of epidemiological and  
39 physiological evidence. *International Journal of Risk & Safety in Medicine*. 2016;28(3):125-141.
- 40 9. Clements CC, Castro VM, Blumenthal SR, et al. Prenatal antidepressant exposure is associated  
41 with risk for attention-deficit hyperactivity disorder but not autism spectrum disorder in a large health  
42 system. *Molecular psychiatry*. 2015;20(6):727-734.
- 43 10. Boukhris T, Sheehy O, Mottron L, et al. Antidepressant use during pregnancy and the risk of  
44 autism spectrum disorder in children. *JAMA pediatrics*. 2016;170(2):117-124.
- 45 11. Hadjikhani N. Serotonin, pregnancy and increased autism prevalence: is there a link? *Medical  
46 Hypotheses*. 2010;74(5):880-883.
- 47 12. Brown HK, Ray JG, Wilton AS, et al. Association Between Serotonergic Antidepressant Use During  
48 Pregnancy and Autism Spectrum Disorder in Children. *Jama*. 2017;317(15):1544-1552.
- 49 13. Sujan AC, Rickert ME, Öberg AS, et al. Associations of Maternal Antidepressant Use During the  
50  
51  
52  
53  
54  
55  
56  
57

1  
2  
3 First Trimester of Pregnancy With Preterm Birth, Small for Gestational Age, Autism Spectrum Disorder,  
4 and Attention-Deficit/Hyperactivity Disorder in Offspring. *Jama*. 2017;317(15):1553-1562.

5 14. Oberlander TF, Zwaigenbaum L. Disentangling Maternal Depression and Antidepressant Use  
6 During Pregnancy as Risks for Autism in Children. *Jama*. 2017;317(15):1533-1534.

7 15. Mezzacappa A, Lasica P-A, Gianfagna F, et al. Risk for Autism Spectrum Disorders According to  
8 Period of Prenatal Antidepressant Exposure: A Systematic Review and Meta-analysis. *JAMA pediatrics*.  
9 2017.

10 16. Baird G, Simonoff E, Pickles A, et al. Prevalence of disorders of the autism spectrum in a  
11 population cohort of children in South Thames: the Special Needs and Autism Project (SNAP). *The*  
12 *lancet*. 2006;368(9531):210-215.

13 17. Rutter M. Incidence of autism spectrum disorders: Changes over time and their meaning\*. *Acta*  
14 *paediatrica*. 2005;94(1):2-15.

15 18. Hill AP, Zuckerman K, Fombonne E. Epidemiology of autism spectrum disorders. *Translational*  
16 *Approaches to Autism Spectrum Disorder*: Springer 2015:13-38.

17 19. Newschaffer CJ, Croen LA, Daniels J, et al. The epidemiology of autism spectrum disorders\*.  
18 *Annu Rev Public Health*. 2007;28:235-258.

19 20. Brown HK, Hussain-Shamsy N, Lunskey Y, et al. The association between antenatal exposure to  
20 selective serotonin reuptake inhibitors and autism: a systematic review and meta-analysis. *The Journal*  
21 *of clinical psychiatry*. 2017;78(1):e48.

22 21. Gidaya NB, Lee BK, Burstyn I, et al. In utero exposure to selective serotonin reuptake inhibitors  
23 and risk for autism spectrum disorder. *Journal of autism and developmental disorders*.  
24 2014;44(10):2558-2567.

25 22. Croen LA, Grether JK, Yoshida CK, et al. Antidepressant use during pregnancy and childhood  
26 autism spectrum disorders. *Archives of general psychiatry*. 2011;68(11):1104-1112.

27 23. Rai D, Lee BK, Dalman C, et al. Parental depression, maternal antidepressant use during  
28 pregnancy, and risk of autism spectrum disorders: population based case-control study. 2013.

29 24. Schirm E, Pedersen L, Tobi H, et al. Drug use among fathers around time of conception: two  
30 register based surveys from Denmark and The Netherlands. *Pharmacoepidemiology and drug safety*.  
31 2004;13(9):609-613.

32 25. Engeland A, Bramness JG, Daltveit AK, et al. Prescription drug use among fathers and mothers  
33 before and during pregnancy. A population - based cohort study of 106 000 pregnancies in Norway  
34 2004–2006. *British journal of clinical pharmacology*. 2008;65(5):653-660.

35 26. Crijns I, Bos J, Knol M, et al. Paternal drug use: before and during pregnancy. *Expert opinion on*  
36 *drug safety*. 2012;11(4):513-518.

37 27. Sever LE. Male-mediated developmental toxicity. *Toxicology & Applied Pharmacology*.  
38 1993;14(1):506–513.

39 28. Friedler G. Paternal exposures: Impact on reproductive and developmental outcome. An  
40 overview. *Pharmacology Biochemistry & Behavior*. 1996;55(4):691-700.

41 29. Anderson D, Schmid TE, Baumgartner A. Male-mediated developmental toxicity. *Asian journal of*  
42 *andrology*. 2014;16(1):81.

43 30. Cordier S. Evidence for a role of paternal exposures in developmental toxicity. *Basic & clinical*  
44 *pharmacology & toxicology*. 2008;102(2):176-181.

45 31. Engeland A, Børge T, Daltveit AK, et al. Effects of preconceptional paternal drug exposure on  
46 birth outcomes: cohort study of 340 000 pregnancies using Norwegian population - based databases.



- 1  
2  
3 British journal of clinical pharmacology. 2013;75(4):1134-1141.
- 4 32. Tanrikut C, Feldman AS, Altemus M, et al. Adverse effect of paroxetine on sperm. Fertility and  
5 sterility. 2010;94(3):1021-1026.
- 6 33. Safarinejad MR. Sperm DNA damage and semen quality impairment after treatment with  
7 selective serotonin reuptake inhibitors detected using semen analysis and sperm chromatin structure  
8 assay. The Journal of urology. 2008;180(5):2124-2128.
- 9 34. Lewis S, Aitken R. DNA damage to spermatozoa has impacts on fertilization and pregnancy. Cell  
10 and tissue research. 2005;322(1):33-41.
- 11 35. Pedersen CB, Gøtzsche H, Møller JØ, et al. The Danish civil registration system. Dan Med Bull.  
12 2006;53(4):441-449.
- 13 36. Knudsen LB, Olsen J. The Danish Medical Birth Registry. Danish medical bulletin.  
14 1998;45(3):320-323.
- 15 37. Kildemoes HW, Sørensen HT, Hallas J. The Danish national prescription registry. Scandinavian  
16 journal of public health. 2011;39(7 suppl):38-41.
- 17 38. Mors O, Perto GP, Mortensen PB. The Danish psychiatric central research register. Scandinavian  
18 journal of public health. 2011;39(7 suppl):54-57.
- 19 39. Andersen TF, Madsen M, Jørgensen J, et al. The Danish National Hospital Register. A valuable  
20 source of data for modern health sciences. Danish medical bulletin. 1999;46(3):263-268.
- 21 40. Lauritsen MB, Jørgensen M, Madsen KM, et al. Validity of childhood autism in the Danish  
22 Psychiatric Central Register: findings from a cohort sample born 1990–1999. Journal of autism and  
23 developmental disorders. 2010;40(2):139-148.
- 24 41. Christensen J, Parner ET, Vestergaard M. Antidepressant exposure in pregnancy and risk of autism  
25 spectrum disorders. Clinical epidemiology. 2013;5:449-459.
- 26 42. Hviid A, Melbye M, Pasternak B. Use of selective serotonin reuptake inhibitors during pregnancy  
27 and risk of autism. New England Journal of Medicine. 2013;369(25):2406-2415.
- 28 43. Maciag D, Simpson KL, Coppinger D, et al. Neonatal antidepressant exposure has lasting effects  
29 on behavior and serotonin circuitry. Neuropsychopharmacology. 2006;31(1):47-57.
- 30 44. Bonnin A, Levitt P. Fetal, maternal and placental sources of serotonin and new implications for  
31 developmental programming of the brain. Neuroscience. 2011;197:1.
- 32 45. Tanrikut C, Schlegel PN. Antidepressant-associated changes in semen parameters. Urology.  
33 2007;69(1):185. e185-185. e187.
- 34 46. Elmazoudy R, Abdelhameed N, Elmasry A. Paternal dapoxetine administration induced  
35 deterioration in reproductive performance, fetal outcome, sexual behavior and biochemistry of male  
36 rats. International Journal of Impotence Research. 2015;27(6).
- 37 47. Daniels JL, Forssen U, Hultman CM, et al. Parental psychiatric disorders associated with autism  
38 spectrum disorders in the offspring. Pediatrics. 2008;121(5):e1357-e1362.
- 39 48. Larsson HJ, Eaton WW, Madsen KM, et al. Risk factors for autism: perinatal factors, parental  
40 psychiatric history, and socioeconomic status. American journal of epidemiology.  
41 2005;161(10):916-925.
- 42 49. Jokiranta E, Brown AS, Heinimaa M, et al. Parental psychiatric disorders and autism spectrum  
43 disorders. Psychiatry research. 2013;207(3):203-211.
- 44 50. Kogan MD, Blumberg SJ, Schieve LA, et al. Prevalence of parent-reported diagnosis of autism  
45 spectrum disorder among children in the US, 2007. Pediatrics. 2009;124(5):1395-1403.
- 46  
47  
48  
49  
50  
51  
52  
53  
54  
55  
56  
57  
58  
59  
60

1  
2  
3  
4  
5  
6  
7  
8  
9  
10  
11  
12  
13  
14  
15  
16  
17  
18  
19  
20  
21  
22  
23  
24  
25  
26  
27  
28  
29  
30  
31  
32  
33  
34  
35  
36  
37  
38  
39  
40  
41  
42  
43  
44  
45  
46  
47  
48  
49  
50  
51  
52  
53  
54  
55  
56  
57  
58  
59  
60

For peer review only

**Table 1. Baseline Characteristics of the study population**

| <b>Characteristic</b>                               | <b>Paternal SSRIs use during the last 3 months prior to conception<br/>(N=6,870)</b> | <b>No paternal SSRIs use during the last 3 months prior to conception<br/>(N=663, 052)</b> |
|-----------------------------------------------------|--------------------------------------------------------------------------------------|--------------------------------------------------------------------------------------------|
| <b>Calendar Year of birth, No. (%)</b>              |                                                                                      |                                                                                            |
| 1998-2000                                           | 1,021(14.9)                                                                          | 185,784(28.0)                                                                              |
| 2001-2003                                           | 1,526(22.2)                                                                          | 179,952(27.1)                                                                              |
| 2004-2006                                           | 2,305(33.5)                                                                          | 178,664(27.0)                                                                              |
| 2007-2008                                           | 2,018(29.4)                                                                          | 118,652(17.9)                                                                              |
| <b>Gender, No. (%)</b>                              |                                                                                      |                                                                                            |
| Boy                                                 | 3,549(51.7)                                                                          | 340,194(51.3)                                                                              |
| Girl                                                | 3,321(48.3)                                                                          | 322,858(48.7)                                                                              |
| <b>Birth Weight (g), No. (%)</b>                    |                                                                                      |                                                                                            |
| <2500                                               | 278(4.1)                                                                             | 22,315(3.4)                                                                                |
| 2500-3250                                           | 1,729(25.2)                                                                          | 154,494(23.3)                                                                              |
| 3250-4000                                           | 3,582(52.1)                                                                          | 348,853(52.6)                                                                              |
| 4000-8000                                           | 1,243(18.1)                                                                          | 132,343(19.9)                                                                              |
| Unknown                                             | 38(0.5)                                                                              | 5,047(0.8)                                                                                 |
| <b>Parity, No. (%)</b>                              |                                                                                      |                                                                                            |
| 1                                                   | 2,693(39.2)                                                                          | 282,895(42.7)                                                                              |
| 2                                                   | 2,433(35.4)                                                                          | 250,496(37.8)                                                                              |
| ≥3                                                  | 1,744(25.4)                                                                          | 129,661(19.5)                                                                              |
| <b>Preterm Birth, No. (%)</b><br>(<37 weeks)        |                                                                                      |                                                                                            |
| No                                                  | 6,489(94.4)                                                                          | 630,851(95.1)                                                                              |
| Yes                                                 | 381(5.6)                                                                             | 32,201(4.9)                                                                                |
| <b>Apgar score at 5 minutes, No. (%)</b>            |                                                                                      |                                                                                            |
| 0-7                                                 | 91(1.3)                                                                              | 8,224(1.2)                                                                                 |
| 8-9                                                 | 442(6.4)                                                                             | 39,941(6.0)                                                                                |
| 10                                                  | 6,269(91.3)                                                                          | 607,634(91.7)                                                                              |
| Unknown                                             | 68(1.0)                                                                              | 7,253(1.1)                                                                                 |
| <b>Maternal age at child birth (years), No. (%)</b> |                                                                                      |                                                                                            |
| ≤25                                                 | 958(13.9)                                                                            | 99,273(15.0)                                                                               |
| 26-30                                               | 2,238(32.6)                                                                          | 244,419(36.9)                                                                              |
| 31-35                                               | 2,386(34.7)                                                                          | 225,610(34.0)                                                                              |
| >35                                                 | 1,288(18.8)                                                                          | 93,750(14.1)                                                                               |
| <b>Paternal age at child birth (years), No. (%)</b> |                                                                                      |                                                                                            |
| ≤25                                                 | 364(5.3)                                                                             | 47,490(7.2)                                                                                |
| 26-30                                               | 1,434(20.9)                                                                          | 180,612(27.2)                                                                              |
| 31-35                                               | 2,395(34.8)                                                                          | 242,702(36.6)                                                                              |
| >35                                                 | 2,677(39.0)                                                                          | 192,248(29.0)                                                                              |

**Table 1. Baseline Characteristics of the study population (continued)**

| <b>Maternal smoking status<sup>a</sup>, No. (%)</b>      |              |               |
|----------------------------------------------------------|--------------|---------------|
| No                                                       | 4,326(63.0)  | 477,574(72.0) |
| Yes                                                      | 1,334(19.4)  | 106,233(16.0) |
| Unknown                                                  | 1,210(17.6)  | 79,245(12.0)  |
| <b>Maternal AD use during pregnancy, No. (%)</b>         |              |               |
| No                                                       | 6,548(94.0)  | 653,496(98.6) |
| Yes                                                      | 412(6.0)     | 9,556(1.4)    |
| <b>Maternal history of Affective disorder, No. (%)</b>   |              |               |
| No                                                       | 6,607(96.2)  | 654,234(98.7) |
| Yes                                                      | 263(3.8)     | 8,818(1.3)    |
| <b>Paternal history of Affective disorder, No. (%)</b>   |              |               |
| No                                                       | 6,099 (88.8) | 659,639(99.5) |
| Yes                                                      | 771(11.2)    | 3,413(0.5)    |
| <b>Maternal history of psychiatric disorder, No. (%)</b> |              |               |
| No                                                       | 6,175(89.9)  | 626,840(94.5) |
| Yes                                                      | 695(10.1)    | 36,212(5.5)   |
| <b>Paternal history of psychiatric disorder, No. (%)</b> |              |               |
| No                                                       | 5,092 (74.1) | 630,990(95.2) |
| Yes                                                      | 1,178(25.9)  | 32,062(4.8)   |

**Abbreviations:** SSRI, selective serotonin reuptake inhibitor; N, number; AD, antidepressant drugs;

<sup>a</sup> Maternal smoking information was missing among those children born from 2007 to 2008.

**Table 2. Association between paternal SSRIs use before conception and ASD in offspring**

| Paternal SSRIs use before conception                                   | Offspring with ASD no. | Follow-up no. of person-yr | Hazard Ratio (95% CI) |                      |                      |
|------------------------------------------------------------------------|------------------------|----------------------------|-----------------------|----------------------|----------------------|
|                                                                        |                        |                            | Crude                 | Model 1 <sup>a</sup> | Model 2 <sup>b</sup> |
| No use during the last 3 months prior to conception                    | 7,473                  | 6,765,205                  | Ref                   | Ref                  | Ref                  |
| Use during the last 3 months prior to conception                       | 104                    | 61,555                     | 1.62(1.33-1.96)       | 1.54(1.27-1.88)      | 1.43(1.18-1.74)      |
| No use during the last 1 year prior to conception                      | 7,429                  | 6,736,654                  | Ref                   | Ref                  | Ref                  |
| Use only from the last 1 year to the last 3 months prior to conception | 71                     | 39,422                     | 1.71(1.35-2.16)       | 1.66(1.31-2.09)      | 1.54(1.21-1.94)      |
| Use only during the last 3 months prior to conception                  | 20                     | 14,738                     | 1.29(0.83-2.00)       | 1.24 (0.80-1.93)     | 1.17(0.75-1.82)      |
| Use both before and during the last 3 months prior to conception       | 57                     | 35,946                     | 1.52(1.17-1.97)       | 1.43(1.10-1.86)      | 1.32(1.02-1.72)      |

**Abbreviations:** AD, antidepressant drugs; SSRI, selective serotonin reuptake inhibitor; ASD, Autism Spectrum Disorder; No., number; HR, Hazard Ratio

<sup>a</sup> Adjusted for calendar year of birth, sex, parity, mother age, father age, maternal smoking, mother psychiatric history, maternal AD use during pregnancy

<sup>b</sup> Model 1 further adjusted for father psychiatric history

**Table 3. Association between paternal SSRIs use before conception and ASD in offspring born to fathers diagnosed with affective disorder or not**

| Paternal SSRIs use before conception                                   | Offspring with ASD no. | Follow-up no. of person-yr | Hazard Ratio (95% CI) |                      |                      |
|------------------------------------------------------------------------|------------------------|----------------------------|-----------------------|----------------------|----------------------|
|                                                                        |                        |                            | Crude                 | Model 1 <sup>a</sup> | Model 2 <sup>b</sup> |
| <b>Fathers with affective disorder</b>                                 |                        |                            |                       |                      |                      |
| No use during the last 3 months prior to conception                    | 58                     | 30,908                     | Ref                   | Ref                  | Ref                  |
| Use during the last 3 months prior to conception                       | 14                     | 6,625                      | 1.17(0.65-2.09)       | 1.10(0.61-1.98)      | 1.10(0.61-1.98)      |
| No use during the last 1 year prior to conception                      | 53                     | 28,033                     | Ref                   | Ref                  | Ref                  |
| Use only from the last 1 year to the last 3 months prior to conception | 8                      | 4,082                      | 1.07(0.51-2.25)       | 1.08(0.51-2.30)      | 1.08(0.51-2.30)      |
| Use only during the last 3 months prior to conception                  | 2                      | 1,164                      | 0.91(0.22-3.75)       | 0.89(0.21-3.75)      | 0.89(0.21-3.75)      |
| Use both before and during the last 3 months prior to conception       | 9                      | 4,254                      | 1.16(0.57-2.35)       | 1.10(0.55-2.22)      | 1.10(0.55-2.22)      |
| <b>Fathers without affective disorder</b>                              |                        |                            |                       |                      |                      |
| No use during the last 3 months prior to conception                    | 7,415                  | 6,752,899                  | Ref                   | Ref                  | Ref                  |
| Use during the last 3 months prior to conception                       | 90                     | 36,329                     | 1.57(1.27-1.93)       | 1.52(1.23-1.87)      | 1.45(1.18-1.79)      |
| No use during the last 1 year prior to conception                      | 7,376                  | 6,714,926                  | Ref                   | Ref                  | Ref                  |
| Use only from the last 1 year to the last 3 months prior to conception | 63                     | 37,973                     | 1.69(1.32-2.17)       | 1.64(1.28-2.11)      | 1.57(1.23-2.02)      |
| Use only during the last 3 months prior to conception                  | 18                     | 7,354                      | 1.26(0.79-2.00)       | 1.23(0.77-1.95)      | 1.19(0.75-1.88)      |
| Use both before and during the last 3 months prior to conception       | 48                     | 28,974                     | 1.45(1.09-1.93)       | 1.38(1.04-1.84)      | 1.32(0.99-1.76)      |

**Abbreviations:** AD, antidepressant drugs; SSRI, selective serotonin reuptake inhibitor; ASD, Autism Spectrum Disorder; No., number; HR, Hazard Ratio

<sup>a</sup> Adjusted for calendar year of birth, parity, mother age, father age, maternal smoking, mother psychiatric history, maternal AD use during pregnancy

<sup>b</sup> Model 1 further adjusted for father psychiatric history

**Table 4. Paternal SSRI use before pregnancy and ASD in exposed and unexposed siblings from 5,479 families**

| Paternal SSRIs use before conception                | Number of offspring no. | Offspring with ASD no. | Hazard Ratio (95% CI) |                      |
|-----------------------------------------------------|-------------------------|------------------------|-----------------------|----------------------|
|                                                     |                         |                        | Crude                 | Model 1 <sup>a</sup> |
| No use during the last 3 months prior to conception | 2,792                   | 45                     | Ref                   | Ref                  |
| Use during the last 3 months prior to conception    | 2,687                   | 23                     | 1.08(1.01-1.16)       | 1.04(0.94-1.14)      |

**Abbreviations:** AD, antidepressant drugs; SSRI, selective serotonin reuptake inhibitor; ASD, Autism Spectrum Disorder; No., number; HR, Hazard Ratio

<sup>a</sup> Adjusted for sex, parity, mother age, father age, maternal smoking, maternal AD use during pregnancy

**TablesS1. Association between paternal SSRIs use before conception and ASD in offspring: analyses stratified by gender**

| Paternal SSRIs use before conception                                   | Offspring with ASD no. | Follow-up no. of person-yr | Hazard Ratio (95% CI) |                      |                      |
|------------------------------------------------------------------------|------------------------|----------------------------|-----------------------|----------------------|----------------------|
|                                                                        |                        |                            | Crude                 | Model 1 <sup>a</sup> | Model 2 <sup>b</sup> |
| <b>Boys</b>                                                            |                        |                            |                       |                      |                      |
| No use during the last 3 months prior to conception                    | 6,005                  | 3,459,592                  | Ref                   | Ref                  | Ref                  |
| Use during the last 3 months prior to conception                       | 84                     | 31,642                     | 1.61(1.30-2.00)       | 1.55(1.25-1.92)      | 1.44(1.16-1.79)      |
| No use during the last 1 year prior to conception                      | 5,969                  | 3,444,956                  | Ref                   | Ref                  | Ref                  |
| Use only from the last 1 year to the last 3 months prior to conception | 58                     | 20,031                     | 1.74(1.34-2.25)       | 1.69(1.30-2.19)      | 1.58(1.22-2.05)      |
| Use only during the last 3 months prior to conception                  | 18                     | 7,622                      | 1.42(0.89-2.26)       | 1.39(0.87-2.21)      | 1.31(0.83-2.09)      |
| Use both before and during the last 3 months prior to conception       | 44                     | 18,623                     | 1.44 (1.07-1.93)      | 1.36(1.01-1.84)      | 1.26(0.94-1.71)      |
| <b>Girls</b>                                                           |                        |                            |                       |                      |                      |
| No use during the last 3 months prior to conception                    | 1,468                  | 3,305,613                  | Ref                   | Ref                  | Ref                  |
| Use during the last 3 months prior to conception                       | 20                     | 29,914                     | 1.63(1.05-2.53)       | 1.54(0.99-2.40)      | 1.41(0.90-2.20)      |
| No use during the last 1 year prior to conception                      | 1,460                  | 3,291,698                  | Ref                   | Ref                  | Ref                  |
| Use only from the last 1 year to the last 3 months prior to conception | 13                     | 19,390                     | 1.61(0.93-2.78)       | 1.53(0.88-2.64)      | 1.37(0.79-2.38)      |
| Use only during the last 3 months prior to conception                  | 2                      | 7,116                      | 0.67(0.17-2.69)       | 0.64(0.16-2.55)      | 0.59(0.15-2.36)      |
| Use both before and during the last 3 months prior to conception       | 13                     | 75,323                     | 1.84(1.06-3.17)       | 1.74(1.01-3.01)      | 1.59(0.92-2.75)      |

**Abbreviations:** AD, antidepressant drugs; SSRI, selective serotonin reuptake inhibitor; ASD, Autism Spectrum Disorder; No., number; HR, Hazard Ratio

<sup>a</sup> Adjusted for calendar year of birth, parity, mother age, father age, maternal smoking, mother psychiatric history, maternal AD use during pregnancy

<sup>b</sup> Model 1 further adjusted for father psychiatric history



**TableS2. Association between paternal SSRIs use before conception and ASD in offspring born to mother who neither received antidepressants medication during pregnancy nor had affective disorders before birth of child**

| Paternal SSRIs use before conception                                   | Offspring with ASD no. | Follow-up no. of person-yr | Hazard Ratio (95% CI) |                      |                      |
|------------------------------------------------------------------------|------------------------|----------------------------|-----------------------|----------------------|----------------------|
|                                                                        |                        |                            | Crude                 | Model 1 <sup>a</sup> | Model 2 <sup>b</sup> |
| No use during the last 3 months prior to conception                    | 7,184                  | 6,627,720                  | Ref                   | Ref                  | Ref                  |
| Use during the last 3 months prior to conception                       | 91                     | 57,081                     | 1.55(1.26-1.91)       | 1.57(1.28-1.93)      | 1.45(1.18-1.79)      |
| No use during the last 1 year prior to conception                      | 7,144                  | 6,600,852                  | Ref                   | Ref                  | Ref                  |
| Use only from the last 1 year to the last 3 months prior to conception | 64                     | 37,032                     | 1.67(1.30-2.13)       | 1.68(1.31-2.15)      | 1.56(1.22-1.99)      |
| Use only during the last 3 months prior to conception                  | 16                     | 13,634                     | 1.13(0.69-1.85)       | 1.15(0.71-1.89)      | 1.08(0.66-1.77)      |
| Use both before and during the last 3 months prior to conception       | 51                     | 33,283                     | 1.50(1.13-1.97)       | 1.50(1.13-1.97)      | 1.38(1.05-1.82)      |

**Abbreviations:** AD, antidepressant drugs; SSRI, selective serotonin reuptake inhibitor; ASD, Autism Spectrum Disorder; No., number; HR, Hazard Ratio

<sup>a</sup> Adjusted for calendar year of birth, parity, mother age, father age, maternal smoking, mother psychiatric history

<sup>b</sup> Model 1 further adjusted for father psychiatric history

## STROBE Statement—checklist of items that should be included in reports of observational studies

|                              | Item No | Recommendation                                                                                                                                                                                                                                                                                                                                                                                                                                                         | Page No.       |
|------------------------------|---------|------------------------------------------------------------------------------------------------------------------------------------------------------------------------------------------------------------------------------------------------------------------------------------------------------------------------------------------------------------------------------------------------------------------------------------------------------------------------|----------------|
| <b>Title and abstract</b>    | 1       | (a) Indicate the study's design with a commonly used term in the title or the abstract                                                                                                                                                                                                                                                                                                                                                                                 | 2              |
|                              |         | (b) Provide in the abstract an informative and balanced summary of what was done and what was found                                                                                                                                                                                                                                                                                                                                                                    | 2-3            |
| <b>Introduction</b>          |         |                                                                                                                                                                                                                                                                                                                                                                                                                                                                        |                |
| Background/rationale         | 2       | Explain the scientific background and rationale for the investigation being reported                                                                                                                                                                                                                                                                                                                                                                                   | 4              |
| Objectives                   | 3       | State specific objectives, including any prespecified hypotheses                                                                                                                                                                                                                                                                                                                                                                                                       | 5              |
| <b>Methods</b>               |         |                                                                                                                                                                                                                                                                                                                                                                                                                                                                        |                |
| Study design                 | 4       | Present key elements of study design early in the paper                                                                                                                                                                                                                                                                                                                                                                                                                | 6              |
| Setting                      | 5       | Describe the setting, locations, and relevant dates, including periods of recruitment, exposure, follow-up, and data collection                                                                                                                                                                                                                                                                                                                                        | 6-8            |
| Participants                 | 6       | (a) <i>Cohort study</i> —Give the eligibility criteria, and the sources and methods of selection of participants. Describe methods of follow-up<br><i>Case-control study</i> —Give the eligibility criteria, and the sources and methods of case ascertainment and control selection. Give the rationale for the choice of cases and controls<br><i>Cross-sectional study</i> —Give the eligibility criteria, and the sources and methods of selection of participants | 6-8            |
|                              |         | (b) <i>Cohort study</i> —For matched studies, give matching criteria and number of exposed and unexposed<br><i>Case-control study</i> —For matched studies, give matching criteria and the number of controls per case                                                                                                                                                                                                                                                 |                |
| Variables                    | 7       | Clearly define all outcomes, exposures, predictors, potential confounders, and effect modifiers. Give diagnostic criteria, if applicable                                                                                                                                                                                                                                                                                                                               | 6-8            |
| Data sources/<br>measurement | 8*      | For each variable of interest, give sources of data and details of methods of assessment (measurement). Describe comparability of assessment methods if there is more than one group                                                                                                                                                                                                                                                                                   | 6-8            |
| Bias                         | 9       | Describe any efforts to address potential sources of bias                                                                                                                                                                                                                                                                                                                                                                                                              | 9-10           |
| Study size                   | 10      | Explain how the study size was arrived at                                                                                                                                                                                                                                                                                                                                                                                                                              | 10             |
| Quantitative<br>variables    | 11      | Explain how quantitative variables were handled in the analyses. If applicable, describe which groupings were chosen and why                                                                                                                                                                                                                                                                                                                                           | 9              |
| Statistical methods          | 12      | (a) Describe all statistical methods, including those used to control for confounding                                                                                                                                                                                                                                                                                                                                                                                  | 9-10           |
|                              |         | (b) Describe any methods used to examine subgroups and interactions                                                                                                                                                                                                                                                                                                                                                                                                    | 9              |
|                              |         | (c) Explain how missing data were addressed                                                                                                                                                                                                                                                                                                                                                                                                                            | 9              |
|                              |         | (d) <i>Cohort study</i> —If applicable, explain how loss to follow-up was addressed<br><i>Case-control study</i> —If applicable, explain how matching of cases and controls was addressed<br><i>Cross-sectional study</i> —If applicable, describe analytical methods taking account of sampling strategy                                                                                                                                                              | Not applicable |
|                              |         | (e) Describe any sensitivity analyses                                                                                                                                                                                                                                                                                                                                                                                                                                  | 9              |

| <b>Results</b>           |     |                                                                                                                                                                                                              |                |
|--------------------------|-----|--------------------------------------------------------------------------------------------------------------------------------------------------------------------------------------------------------------|----------------|
| Participants             | 13* | (a) Report numbers of individuals at each stage of study—eg numbers potentially eligible, examined for eligibility, confirmed eligible, included in the study, completing follow-up, and analysed            | 10             |
|                          |     | (b) Give reasons for non-participation at each stage                                                                                                                                                         | Not applicable |
|                          |     | (c) Consider use of a flow diagram                                                                                                                                                                           |                |
| Descriptive data         | 14* | (a) Give characteristics of study participants (eg demographic, clinical, social) and information on exposures and potential confounders                                                                     | 10             |
|                          |     | (b) Indicate number of participants with missing data for each variable of interest                                                                                                                          | 20             |
|                          |     | (c) <i>Cohort study</i> —Summarise follow-up time (eg, average and total amount)                                                                                                                             | 11             |
| Outcome data             | 15* | <i>Cohort study</i> —Report numbers of outcome events or summary measures over time                                                                                                                          | 10-11          |
|                          |     | <i>Case-control study</i> —Report numbers in each exposure category, or summary measures of exposure                                                                                                         |                |
|                          |     | <i>Cross-sectional study</i> —Report numbers of outcome events or summary measures                                                                                                                           |                |
| Main results             | 16  | (a) Give unadjusted estimates and, if applicable, confounder-adjusted estimates and their precision (eg, 95% confidence interval). Make clear which confounders were adjusted for and why they were included | 11             |
|                          |     | (b) Report category boundaries when continuous variables were categorized                                                                                                                                    | 19             |
|                          |     | (c) If relevant, consider translating estimates of relative risk into absolute risk for a meaningful time period                                                                                             | Not relevant   |
| Other analyses           | 17  | Report other analyses done—eg analyses of subgroups and interactions, and sensitivity analyses                                                                                                               | 11-12          |
| <b>Discussion</b>        |     |                                                                                                                                                                                                              |                |
| Key results              | 18  | Summarise key results with reference to study objectives                                                                                                                                                     | 12             |
| Limitations              | 19  | Discuss limitations of the study, taking into account sources of potential bias or imprecision. Discuss both direction and magnitude of any potential bias                                                   | 14-15          |
| Interpretation           | 20  | Give a cautious overall interpretation of results considering objectives, limitations, multiplicity of analyses, results from similar studies, and other relevant evidence                                   | 12-13          |
| Generalisability         | 21  | Discuss the generalisability (external validity) of the study results                                                                                                                                        | 14             |
| <b>Other information</b> |     |                                                                                                                                                                                                              |                |
| Funding                  | 22  | Give the source of funding and the role of the funders for the present study and, if applicable, for the original study on which the present article is based                                                | 15             |

\*Give information separately for cases and controls in case-control studies and, if applicable, for exposed and unexposed groups in cohort and cross-sectional studies.

**Note:** An Explanation and Elaboration article discusses each checklist item and gives methodological background and published examples of transparent reporting. The STROBE checklist is best used in conjunction with this article (freely available on the Web sites of PLoS Medicine at <http://www.plosmedicine.org/>, Annals of Internal Medicine at <http://www.annals.org/>, and Epidemiology at <http://www.epidem.com/>). Information on the STROBE Initiative is available at [www.strobe-statement.org](http://www.strobe-statement.org).

# BMJ Open

## Risk of autism spectrum disorder in offspring following paternal use of selective serotonin reuptake inhibitors before conception: a population-based cohort study

|                                 |                                                                                                                                                                                                                                                                                                                                                                                                                                                                                                                                                                                                                                                                                                                                                                                                                                                                                                                                                                                                                                                                                                                                                                                                        |
|---------------------------------|--------------------------------------------------------------------------------------------------------------------------------------------------------------------------------------------------------------------------------------------------------------------------------------------------------------------------------------------------------------------------------------------------------------------------------------------------------------------------------------------------------------------------------------------------------------------------------------------------------------------------------------------------------------------------------------------------------------------------------------------------------------------------------------------------------------------------------------------------------------------------------------------------------------------------------------------------------------------------------------------------------------------------------------------------------------------------------------------------------------------------------------------------------------------------------------------------------|
| Journal:                        | <i>BMJ Open</i>                                                                                                                                                                                                                                                                                                                                                                                                                                                                                                                                                                                                                                                                                                                                                                                                                                                                                                                                                                                                                                                                                                                                                                                        |
| Manuscript ID                   | bmjopen-2017-016368.R2                                                                                                                                                                                                                                                                                                                                                                                                                                                                                                                                                                                                                                                                                                                                                                                                                                                                                                                                                                                                                                                                                                                                                                                 |
| Article Type:                   | Research                                                                                                                                                                                                                                                                                                                                                                                                                                                                                                                                                                                                                                                                                                                                                                                                                                                                                                                                                                                                                                                                                                                                                                                               |
| Date Submitted by the Author:   | 13-Oct-2017                                                                                                                                                                                                                                                                                                                                                                                                                                                                                                                                                                                                                                                                                                                                                                                                                                                                                                                                                                                                                                                                                                                                                                                            |
| Complete List of Authors:       | <p>Yang, Fen; Shanghai Institute of Planned Parenthood Research, Department of Reproductive Epidemiology and Social Science; Aarhus Universitetshospital, Department of Clinical Epidemiology</p> <p>Chen, Jianping; Shanghai Institute of Planned Parenthood Research, Department of Reproductive Epidemiology and Social Science</p> <p>Miao, Mao-Hua; Shanghai Institute of Planned Parenthood Research, Department of Reproductive Epidemiology and Social Science, National Population and Family Planning Key Laboratory of Contraceptive Drugs and Devices</p> <p>Yuan, Wei; Shanghai Institute of Planned Parenthood Research, Reproductive Epidemiology, National Population and Family Planning Key Laboratory of Contraceptive Drugs and Devices</p> <p>Li, Lin; Shanghai Institute of Planned Parenthood Research</p> <p>Liang, Hong; Shanghai Institute of Planned Parenthood Research, Department of Reproductive Epidemiology and Social Science, National Population and Family Planning Key Laboratory of Contraceptive Drugs and Devices</p> <p>Ehrenstein, Vera; Aarhus Universitetshospital</p> <p>Li, Jiong; Aarhus Universitetshospital, Department of Clinical Epidemiology</p> |
| <b>Primary Subject Heading</b>: | Public health                                                                                                                                                                                                                                                                                                                                                                                                                                                                                                                                                                                                                                                                                                                                                                                                                                                                                                                                                                                                                                                                                                                                                                                          |
| Secondary Subject Heading:      | Mental health                                                                                                                                                                                                                                                                                                                                                                                                                                                                                                                                                                                                                                                                                                                                                                                                                                                                                                                                                                                                                                                                                                                                                                                          |
| Keywords:                       | MENTAL HEALTH, Child & adolescent psychiatry < PSYCHIATRY, Adult psychiatry < PSYCHIATRY, NEUROPATHOLOGY                                                                                                                                                                                                                                                                                                                                                                                                                                                                                                                                                                                                                                                                                                                                                                                                                                                                                                                                                                                                                                                                                               |
|                                 |                                                                                                                                                                                                                                                                                                                                                                                                                                                                                                                                                                                                                                                                                                                                                                                                                                                                                                                                                                                                                                                                                                                                                                                                        |

SCHOLARONE™  
Manuscripts

1  
2  
3 **Risk of autism spectrum disorder in offspring following paternal use of selective**  
4 **serotonin reuptake inhibitors before conception: a population-based cohort**  
5 **study**  
6  
7  
8  
9

10 Fen Yang<sup>1,2</sup>; Jianping Chen<sup>1</sup>; Maohua Miao<sup>1</sup>; Wei Yuan<sup>1</sup>; Lin Li<sup>1</sup>; Hong Liang<sup>1</sup>; Vera  
11 Ehrenstein<sup>2</sup>; Jiong Li<sup>2</sup>  
12  
13  
14  
15

16  
17  
18 **Author Affiliation**  
19

20 <sup>1</sup>Key Lab. of Reproduction Regulation of NPFPC, SIPPR, IRD, Fudan University,  
21 Shanghai, 200032, China  
22  
23

24 <sup>2</sup>Department of Clinical Epidemiology, Aarhus University Hospital, Olof Palmes Alle  
25 43-45, DK-8200 Aarhus N, Denmark  
26  
27  
28  
29

30  
31  
32  
33 **Corresponding Author**  
34

35 Hong Liang, MD, PhD  
36

37 Key Lab. of Reproduction Regulation of NPFPC, SIPPR, IRD, Fudan University,  
38 #779 Lao Hu Min Road, Shanghai, 200032, China.  
39  
40

41 Email: [lucylhcn@163.com](mailto:lucylhcn@163.com);  
42

43 Phone number: 86 -21-64771683  
44  
45  
46  
47  
48  
49  
50  
51  
52  
53  
54  
55  
56  
57  
58  
59  
60

## Abstract

### Objective

The present study aimed to examine the association between paternal selective serotonin reuptake inhibitors (SSRIs) use before conception and the risk of autism spectrum disorder (ASD) in offspring.

### Design

A population-based cohort study

### Methods

Based on Danish national registers, we conducted a cohort study of 669,922 children born from 1998 to 2008, with follow-up throughout 2013. The children whose fathers used SSRIs during the last 3 months prior to conception were identified as the exposed. Cox regression model was used to estimate the hazard ratio (HR) for ASD in children.

### Results

Compared with unexposed children, the exposed had a 1.43-fold higher risk of ASD (HR=1.43, 95% confidence interval [CI]: 1.18-1.74) after adjusting for potential confounders. When extending the exposure window to 1 year before conception, the adjusted HR (aHR) of ASD in children of fathers who used SSRIs only from the last year till the last 3 months prior to conception and who used SSRIs both before and during the last 3 months prior to conception was 1.54 (95%CI: 1.21-1.94) and 1.32 (95%CI: 1.02-1.72), respectively. Whereas, the risk in children of fathers who used SSRIs only during the last 3 months prior to conception decreased and became

nonsignificant (aHR=1.17, 95%CI: 0.75-1.82).

## Conclusions

The increased risk of ASD in the offspring associated with paternal SSRIs use before conception may be attributable to the underlying indications.

### Strengths and limitations of this study

- This is the very first study that investigates the link between paternal antidepressants use and ASD risk in children.
- A number of potential confounders, including sociodemographic factors as well as parental psychiatric history, can be adjusted for based on the availability of national health registry data.
- Actual use of SSRIs by fathers during the time period of interest may not be validated.
- Those children who received the diagnosis of ASD from private psychiatrists or remained undiagnosed at the end of the follow-up may not be identified as ASD case.

## Introduction

Depression is a common mental health problem that affects approximately 350 million people worldwide<sup>1</sup>. Selective serotonin reuptake inhibitors (SSRIs) are commonly prescribed for the treatment of depression and other anxiety-related disorders. However, an increasing body of evidence suggests that prenatal exposure to SSRIs is associated with adverse obstetrical and neonatal outcomes<sup>2-5</sup>. In addition, recent studies have indicated a possible link between prenatal SSRI exposure and neurobehavioral problems in children<sup>2, 6-10</sup>, which may be due to the biological mechanisms (i.e. dysfunctional serotonin signaling)<sup>11</sup>. Whereas several studies have suggested that the previously observed association between prenatal SSRI exposure and neurodevelopmental diseases might be due to confounding by related indications<sup>12-15</sup>.

Autism spectrum disorder (ASD) is one of the major neurodevelopmental disorders characterized by impairments in reciprocal social interaction, communication, and repetitive or stereotypic behavior<sup>16</sup>. The estimated prevalence of ASD has dramatically increased from less than 1 in 2,000 children in the 1960s to approximately 1 in 145 children today<sup>17, 18</sup>. Both genetic and environmental risk factors may contribute to ASD<sup>19</sup>. Recently, maternal use of SSRIs during pregnancy has been reported to be associated with an increased risk of ASD in children<sup>10, 20-24</sup>.

If maternal SSRI exposure during pregnancy plays a role in fetal, even in child's, development, an extended effect of earlier exposure on gamete, particularly human sperm, is biologically plausible. Therefore, the potential role of paternal SSRI use in



1  
2  
3 ASD should also be taken into consideration. Studies in the Nordic countries show  
4  
5 that one-third of the fathers used prescription drugs during the last 6 months prior to  
6  
7 conception<sup>25</sup>, and approximately 1.4% of fathers were dispensed SSRIs during the  
8  
9 last 3 months prior to conception<sup>26, 27</sup>. Although the information regarding the  
10  
11 potential effects of SSRI use by fathers is limited, the hypothesis of an increased risk  
12  
13 of adverse pregnancy or neonatal outcome associated with paternal drug exposure is  
14  
15 not new. Several human studies have indicated the adverse effects of paternal SSRIs  
16  
17 use, including impaired semen quality and abnormal sperm DNA fragmentation,  
18  
19 which has been reported to be associated with diminished fertility, adverse pregnancy  
20  
21 outcomes (like pregnancy loss), and an increased risk of childhood disease<sup>28-30</sup>.  
22  
23  
24  
25  
26  
27

28 Little is known on whether paternal SSRIs use before conception contributes to  
29  
30 the risk of ASD in offspring. We conducted a population-based cohort study to  
31  
32 examine the association between paternal SSRIs use during the last 3 months prior to  
33  
34 conception and risk of ASD in offspring, utilizing data from national Danish health  
35  
36 registries.  
37  
38  
39

## 40 **Methods**

### 41 **Study Population**

42  
43 This study was based on several national registers in Denmark. Each Danish resident  
44  
45 is assigned a unique personal identification number (a 10-digit civil registration  
46  
47 system number used in all registries), which enables accurate linkage of national  
48  
49 registries at the individual level<sup>31</sup>. The Danish Medical Birth Registry (DMBR)  
50  
51 contains records of all deliveries in Denmark since 1973 and includes information  
52  
53  
54  
55  
56  
57  
58  
59  
60

1  
2  
3  
4 about gestational age at birth from 1978<sup>32</sup>. Using the DMBR data, we identified a  
5  
6 cohort of all singletons born alive in Denmark during the period of January 1, 1998  
7  
8 through December 31, 2008 (n=687,580). We excluded children without linkage to  
9  
10 their father (n=16,955) or their mother (n=74), with missing parity (n=208), and with  
11  
12 missing or extreme values of gestational age ( $\leq 23$  weeks or  $\geq 45$  weeks, n=421). A  
13  
14 total of 669,922 children were included in the analysis.  
15  
16

### 17 18 **Data on SSRIs use**

19  
20 Information on SSRIs use was drawn from the Danish National Prescription Registry  
21  
22 (DNPR)<sup>33</sup>. Since 1995, this registry has recorded all redeemed prescriptions in  
23  
24 Denmark with the following information: the civil registration number of the patient,  
25  
26 the dispensing date, the medication code (the WHO Anatomical Therapeutic Chemical  
27  
28 (ATC) classification system), the number of packages prescribed, and the number of  
29  
30 doses units in package. Selective serotonin reuptake inhibitors use was identified  
31  
32 based on ATC codes: fluoxetine (N06AB03), citalopram (N06AB04), paroxetine  
33  
34 (N06AB05), sertraline (N06AB06), fluvoxamine (N06AB08), and escitalopram  
35  
36 (N06AB10). It is estimated that spermatogenesis takes approximately 74 days<sup>34</sup>,  
37  
38 therefore we chose the last 3 months prior to conception as the exposure window to  
39  
40 cover the susceptible time period. A child was considered exposed if the dispensing  
41  
42 date fell within the specified exposure window or the number of days for which the  
43  
44 SSRIs medication was supplied overlapped any portion of the exposure window.  
45  
46 Children born to fathers who had no prescriptions for SSRIs and no supply overlap  
47  
48 during the entire exposure window were considered unexposed. The date of  
49  
50  
51  
52  
53  
54  
55  
56  
57  
58  
59  
60

1  
2  
3 conception was estimated by subtracting gestational age from the date of delivery.  
4  
5  
6 Data on paternal SSRIs use during the last two years prior to the conception were  
7  
8 extracted for further analyses. We also retrieved the information about maternal SSRIs  
9  
10 use during the pregnancy.  
11  
12

### 13 **Autism spectrum disorders**

14  
15 Autism spectrum disorders in children were identified by using the Danish Psychiatric  
16  
17 Central Research Register (DPCRR) and the Danish National Patient Register  
18  
19 (DNPR). The DPCRR contains diagnostic information on every admission from  
20  
21 psychiatric hospitals and psychiatric wards in general hospitals in Denmark since  
22  
23 1969, and includes data on all outpatient visits and emergency room contacts since  
24  
25 1995<sup>35</sup>. The DNPR has collected data on all inpatients from all somatic hospitals in  
26  
27 Denmark since 1977 and outpatients from 1995<sup>36</sup>. The combined data from the two  
28  
29 registries were used to identify all children diagnosed with ASD. During the study  
30  
31 period, the diagnosis of ASD was based on the International Classification of  
32  
33 Diseases, 10th version (ICD-10) codes of F84.0 (Childhood autism), F84.1 (Atypical  
34  
35 autism), F84.5 (Asperger syndrome), F84.8 (other pervasive developmental  
36  
37 disorders) and F84.9 (unspecified pervasive developmental disorders). The quality of  
38  
39 the childhood autism diagnosis has been validated and the diagnoses could be  
40  
41 verified in 94% of the children with a record in the DPCRR<sup>37</sup>. Children were  
42  
43 followed up from birth till first diagnosis of ASD, death, emigration, or December 31,  
44  
45 2013, whichever came first.  
46  
47  
48  
49  
50  
51  
52  
53

### 54 **Covariates**

Using the Danish nationwide health registers, we retrieved data on characteristics that may be associated with offspring ASD or paternal SSRIs use. For each child, we obtained information on calendar year of birth, gender of the child, birth weight, Apgar score at 5 minutes, gestational age, maternal parity, maternal age at child birth, paternal age at child birth and maternal smoking status during pregnancy from the DMBR. Parents' psychiatric history prior to birth of the index child was obtained from DPCRR by ICD-8 codes 290-315 from 1977 to 1993 and ICD-10 codes F00-F99 from 1994 onward. Furthermore, we identified parents diagnosed with affective disorders before birth of child (specifically, ICD-8 codes 296.09, 296.19, 296.29, 296.39, 296.99, 298.09, 298.19, 300.49, and 301.19, and ICD-10 codes F30-F34 and F38-F39) using the DPCRR.

### Statistical Analysis

Cox proportional-hazards regression models (using child's calendar age in years as the underlying timescale) were used to estimate the hazard ratios (HRs) and 95% confidence intervals (CIs) of ASD in children following exposure to paternal SSRIs use before conception. Observations were censored if the child died or emigrated before the end of follow-up.

We adjusted for variables as following: the calendar year of birth (1998-2000, 2001-2003, 2004-2006, 2007-2008), gender of the child (boy, girl), parity (1, 2,  $\geq 3$ ), parental age at child birth ( $\leq 25$ , 26-30, 31-35, and  $> 35$  years), maternal smoking status during pregnancy (yes or no), maternal history of psychiatric disorders before birth of child (yes or no), maternal antidepressants use during pregnancy (yes or no)

1  
2  
3 in model 1. We additionally adjusted for paternal history of psychiatric disorders  
4 before birth of child (yes or no) in model 2. Models were also run with the exclusion  
5  
6 of those children with missing data for covariates. The proportional hazard  
7  
8 assumption was evaluated for all variables included in the adjusted model by  
9  
10 comparing estimated log-minus-log survival curves.  
11  
12  
13  
14

15  
16 To distinguish the direct effects of SSRIs use from the effects of the indication of  
17  
18 SSRIs use, we extended the exposure window to 1 year before conception. We then  
19  
20 re-categorized the exposed children into three subgroups: children of fathers who used  
21  
22 SSRIs 1) only from the last year till the last 3 months prior to conception (former  
23  
24 users); 2) only during the last 3 months prior to conception (current short-term users,  
25  
26 hereinafter referred to as ‘current users’); 3) both before and during the last 3 months  
27  
28 prior to conception (both former and current users). The reference group consisted of  
29  
30 those children born to fathers who never used SSRIs medication through the last year  
31  
32 before conception.  
33  
34  
35  
36

37  
38 The stratified analysis was performed to examine whether the association between  
39  
40 paternal SSRIs use and ASD in children differed by gender. We also restricted the  
41  
42 analyses to children whose mothers neither received antidepressant medication during  
43  
44 pregnancy nor had affective disorder before birth of child. To further distinguish the  
45  
46 effect of SSRIs medication from that of the main indication (i.e., affective disorders)  
47  
48 for SSRIs treatment, we performed stratified analyses according to paternal history of  
49  
50 affective disorder before birth of the index child. As for those children born to fathers  
51  
52 with affective disorders, the ASD risk we examined could be solely attributable to  
53  
54  
55  
56  
57  
58  
59  
60

1  
2  
3 paternal SSRIs use since both of the exposed children and the reference children were  
4  
5  
6 with paternal affective disorders.  
7

8 To control for unmeasured family-related confounding factors (such as genetic  
9  
10 liability for neuropsychiatric conditions and early postnatal environmental influences),  
11  
12 we conducted sibling-matched analyses by only including the families with  
13  
14 exposure-discordant siblings, in which there was at least one child with paternal  
15  
16 SSRIs preconception exposure and one child without exposure. Using the stratified  
17  
18 Cox proportional-hazards regression with a separate stratum for each family, we  
19  
20  
21 estimated the association between paternal SSRIs use before conception and ASD in  
22  
23 matched sets of exposure-discordant siblings. In the stratified Cox regression model,  
24  
25  
26 we also adjusted for those covariates that varied among siblings with the same father  
27  
28 (including parental age at conception, maternal parity, smoking, and maternal AD use  
29  
30 during pregnancy).  
31  
32  
33  
34

35 All analyses were performed using SAS version 9.1 (SAS Institute Inc, Cary,  
36  
37 North Carolina, USA).  
38  
39

## 40 **Results**

41  
42 Among the 669,922 singletons included in the study, 6,870 (1.03%) children were  
43  
44 born to fathers who had redeemed a prescription for SSRIs during the last 3 months  
45  
46 prior to conception. During the study period, a total of 7,577 children were diagnosed  
47  
48 with ASD. The median age at diagnosis of ASD was 6.77 years (interquartile range:  
49  
50 4.84 to 9.48 years). Characteristics of the study population are shown in Table 1.  
51  
52  
53 Compared with the unexposed group, there were a higher proportion of exposed  
54  
55  
56  
57  
58  
59  
60

1  
2  
3 children born in later calendar years. Fathers in exposed group were more likely to be  
4  
5 older at child birth and to have a history of psychiatric disorder (including affective  
6  
7 disorder) before birth of child. Mothers of exposed children were characterized as  
8  
9 having higher parity, being more likely to be older at child birth, to use  
10  
11 antidepressants during pregnancy, and to have a history of psychiatric disorder before  
12  
13 birth of child.  
14  
15  
16  
17

18 Among 61,555 person-years of follow-up, we identified 104 cases of ASD in  
19  
20 children born to fathers who used SSRIs during the last 3 months prior to conception  
21  
22 (incidence rate: 169 per 100,000 person-years). This incidence rate corresponded to a  
23  
24 62% increased risk of ASD compared with the unexposed group (Table 2). The  
25  
26 adjusted HR (aHR) of ASD was 1.54 (95% CI: 1.27-1.88) after adjusting for potential  
27  
28 confounders in model 1. After paternal psychiatric history was further adjusted for in  
29  
30 model 2, the estimate was 1.43 (95%CI: 1.18-1.74). When extending the exposure  
31  
32 window to the last one year prior to conception, after the full adjustment, the HR for  
33  
34 ASD in children of fathers who were former users only and who were both former  
35  
36 and current users was 1.54 (95%CI: 1.21-1.94) and 1.32 (95%CI: 1.02-1.72),  
37  
38 respectively. However, the increased risk decreased and became nonsignificant among  
39  
40 children of fathers who were only current users (aHR=1.17, 95%CI: 0.75-1.82, model  
41  
42 2, table2).  
43  
44  
45  
46  
47  
48  
49

50 The risk estimates of ASD were similar for both boys and girls, regardless of the  
51  
52 exposure (Table S1). When we restricted analyses to children whose mothers neither  
53  
54  
55  
56  
57  
58  
59  
60

1  
2  
3 used SSRIs during pregnancy nor had affective disorder before birth of child, the  
4  
5  
6 results did not change essentially (Table S2).  
7

8  
9 When the analyses were stratified by paternal affective disorder before birth of the  
10  
11 index child, in children born to fathers with a history of affective disorder, there was  
12  
13 no association between paternal SSRIs use before conception and ASD in the  
14  
15 offspring (model 2: aHR=1.10, 95%CI: 0.61-1.98). For children whose father without  
16  
17 affective disorder, the patterns of associations remained similar to those of the main  
18  
19 analyses (Table 3).  
20  
21

22  
23 In the sibling analysis, we identified 5,479 families with more than one child and  
24  
25 with at least one child with paternal SSRIs use before conception (Table 4). The risk  
26  
27 of ASD in exposed children was decreased when compared with their unexposed  
28  
29 siblings (aHR=0.74, 95%CI:0.34-1.59), although with wider confidence interval.  
30  
31

### 32 33 **Discussion**

34  
35 In this large population-based cohort study, we observed an increased risk of ASD in  
36  
37 the offspring following paternal use of SSRIs during the last 3 months prior to  
38  
39 conception. However, the risk attenuated after adjusting for a number of potential  
40  
41 confounders, especially fathers' psychiatric conditions. When extending the exposure  
42  
43 window to one year before conception, the ASD risk persisted among children born to  
44  
45 former users but not current users. In addition, among children born to father with  
46  
47 affective disorder, no association was observed. Finally, we performed a sibling  
48  
49 analysis which allowed for better control of unmeasured familial confounding and the  
50  
51 decreased ASD risk was found among exposed children rather than their unexposed  
52  
53  
54  
55  
56  
57  
58  
59  
60



1  
2  
3 siblings. Taken as a whole, our results did not support that paternal SSRIs use before  
4  
5  
6 conception could increase the risk of ASD in children.  
7

8  
9  
10 Recently, concerns have been raised regarding the risk of ASD in the offspring  
11 associated with prenatal exposure to SSRIs. Four previous human studies have  
12 suggested that in utero exposure to antidepressants would increase the risk of ASD in  
13 children<sup>21-24</sup>, although another two studies using the Danish registers have reported no  
14 significant association<sup>38,39</sup>. Basic neuro-biologic studies have showed that prenatal  
15 SSRIs administration may be part of a causal pathway to ASD by operating directly  
16 on the developing brain<sup>40,41</sup>. Considering the detrimental effect of SSRIs on sperm<sup>28,</sup>  
17  
18  
19  
20  
21  
22  
23  
24  
25  
26  
27  
28  
29  
30  
31  
32  
33  
34  
35  
36  
37  
38  
39  
40  
41  
42  
43  
44  
45  
46  
47  
48  
49  
50  
51  
52  
53  
54  
55  
56  
57  
58  
59  
60  
61  
62  
63  
64  
65  
66  
67  
68  
69  
70  
71  
72  
73  
74  
75  
76  
77  
78  
79  
80  
81  
82  
83  
84  
85  
86  
87  
88  
89  
90  
91  
92  
93  
94  
95  
96  
97  
98  
99  
100  
101  
102  
103  
104  
105  
106  
107  
108  
109  
110  
111  
112  
113  
114  
115  
116  
117  
118  
119  
120  
121  
122  
123  
124  
125  
126  
127  
128  
129  
130  
131  
132  
133  
134  
135  
136  
137  
138  
139  
140  
141  
142  
143  
144  
145  
146  
147  
148  
149  
150  
151  
152  
153  
154  
155  
156  
157  
158  
159  
160  
161  
162  
163  
164  
165  
166  
167  
168  
169  
170  
171  
172  
173  
174  
175  
176  
177  
178  
179  
180  
181  
182  
183  
184  
185  
186  
187  
188  
189  
190  
191  
192  
193  
194  
195  
196  
197  
198  
199  
200  
201  
202  
203  
204  
205  
206  
207  
208  
209  
210  
211  
212  
213  
214  
215  
216  
217  
218  
219  
220  
221  
222  
223  
224  
225  
226  
227  
228  
229  
230  
231  
232  
233  
234  
235  
236  
237  
238  
239  
240  
241  
242  
243  
244  
245  
246  
247  
248  
249  
250  
251  
252  
253  
254  
255  
256  
257  
258  
259  
260  
261  
262  
263  
264  
265  
266  
267  
268  
269  
270  
271  
272  
273  
274  
275  
276  
277  
278  
279  
280  
281  
282  
283  
284  
285  
286  
287  
288  
289  
290  
291  
292  
293  
294  
295  
296  
297  
298  
299  
300  
301  
302  
303  
304  
305  
306  
307  
308  
309  
310  
311  
312  
313  
314  
315  
316  
317  
318  
319  
320  
321  
322  
323  
324  
325  
326  
327  
328  
329  
330  
331  
332  
333  
334  
335  
336  
337  
338  
339  
340  
341  
342  
343  
344  
345  
346  
347  
348  
349  
350  
351  
352  
353  
354  
355  
356  
357  
358  
359  
360  
361  
362  
363  
364  
365  
366  
367  
368  
369  
370  
371  
372  
373  
374  
375  
376  
377  
378  
379  
380  
381  
382  
383  
384  
385  
386  
387  
388  
389  
390  
391  
392  
393  
394  
395  
396  
397  
398  
399  
400  
401  
402  
403  
404  
405  
406  
407  
408  
409  
410  
411  
412  
413  
414  
415  
416  
417  
418  
419  
420  
421  
422  
423  
424  
425  
426  
427  
428  
429  
430  
431  
432  
433  
434  
435  
436  
437  
438  
439  
440  
441  
442  
443  
444  
445  
446  
447  
448  
449  
450  
451  
452  
453  
454  
455  
456  
457  
458  
459  
460  
461  
462  
463  
464  
465  
466  
467  
468  
469  
470  
471  
472  
473  
474  
475  
476  
477  
478  
479  
480  
481  
482  
483  
484  
485  
486  
487  
488  
489  
490  
491  
492  
493  
494  
495  
496  
497  
498  
499  
500  
501  
502  
503  
504  
505  
506  
507  
508  
509  
510  
511  
512  
513  
514  
515  
516  
517  
518  
519  
520  
521  
522  
523  
524  
525  
526  
527  
528  
529  
530  
531  
532  
533  
534  
535  
536  
537  
538  
539  
540  
541  
542  
543  
544  
545  
546  
547  
548  
549  
550  
551  
552  
553  
554  
555  
556  
557  
558  
559  
560  
561  
562  
563  
564  
565  
566  
567  
568  
569  
570  
571  
572  
573  
574  
575  
576  
577  
578  
579  
580  
581  
582  
583  
584  
585  
586  
587  
588  
589  
590  
591  
592  
593  
594  
595  
596  
597  
598  
599  
600  
601  
602  
603  
604  
605  
606  
607  
608  
609  
610  
611  
612  
613  
614  
615  
616  
617  
618  
619  
620  
621  
622  
623  
624  
625  
626  
627  
628  
629  
630  
631  
632  
633  
634  
635  
636  
637  
638  
639  
640  
641  
642  
643  
644  
645  
646  
647  
648  
649  
650  
651  
652  
653  
654  
655  
656  
657  
658  
659  
660  
661  
662  
663  
664  
665  
666  
667  
668  
669  
670  
671  
672  
673  
674  
675  
676  
677  
678  
679  
680  
681  
682  
683  
684  
685  
686  
687  
688  
689  
690  
691  
692  
693  
694  
695  
696  
697  
698  
699  
700  
701  
702  
703  
704  
705  
706  
707  
708  
709  
710  
711  
712  
713  
714  
715  
716  
717  
718  
719  
720  
721  
722  
723  
724  
725  
726  
727  
728  
729  
730  
731  
732  
733  
734  
735  
736  
737  
738  
739  
740  
741  
742  
743  
744  
745  
746  
747  
748  
749  
750  
751  
752  
753  
754  
755  
756  
757  
758  
759  
760  
761  
762  
763  
764  
765  
766  
767  
768  
769  
770  
771  
772  
773  
774  
775  
776  
777  
778  
779  
780  
781  
782  
783  
784  
785  
786  
787  
788  
789  
790  
791  
792  
793  
794  
795  
796  
797  
798  
799  
800  
801  
802  
803  
804  
805  
806  
807  
808  
809  
810  
811  
812  
813  
814  
815  
816  
817  
818  
819  
820  
821  
822  
823  
824  
825  
826  
827  
828  
829  
830  
831  
832  
833  
834  
835  
836  
837  
838  
839  
840  
841  
842  
843  
844  
845  
846  
847  
848  
849  
850  
851  
852  
853  
854  
855  
856  
857  
858  
859  
860  
861  
862  
863  
864  
865  
866  
867  
868  
869  
870  
871  
872  
873  
874  
875  
876  
877  
878  
879  
880  
881  
882  
883  
884  
885  
886  
887  
888  
889  
890  
891  
892  
893  
894  
895  
896  
897  
898  
899  
900  
901  
902  
903  
904  
905  
906  
907  
908  
909  
910  
911  
912  
913  
914  
915  
916  
917  
918  
919  
920  
921  
922  
923  
924  
925  
926  
927  
928  
929  
930  
931  
932  
933  
934  
935  
936  
937  
938  
939  
940  
941  
942  
943  
944  
945  
946  
947  
948  
949  
950  
951  
952  
953  
954  
955  
956  
957  
958  
959  
960  
961  
962  
963  
964  
965  
966  
967  
968  
969  
970  
971  
972  
973  
974  
975  
976  
977  
978  
979  
980  
981  
982  
983  
984  
985  
986  
987  
988  
989  
990  
991  
992  
993  
994  
995  
996  
997  
998  
999  
1000

Recently, concerns have been raised regarding the risk of ASD in the offspring associated with prenatal exposure to SSRIs. Four previous human studies have suggested that in utero exposure to antidepressants would increase the risk of ASD in children<sup>21-24</sup>, although another two studies using the Danish registers have reported no significant association<sup>38,39</sup>. Basic neuro-biologic studies have showed that prenatal SSRIs administration may be part of a causal pathway to ASD by operating directly on the developing brain<sup>40,41</sup>. Considering the detrimental effect of SSRIs on sperm<sup>28, 29, 42</sup>, paternal SSRIs use before conception may also cause adverse effects on pregnancy outcomes. However, till now, only one study have suggested that SSRIs administration to male rats could induce deterioration in fertility and fetal outcomes (including weight gain, organ weights and feed consumption)<sup>43</sup>. To our knowledge, our study is the first to investigate the link between paternal antidepressants use before conception and ASD risk in children. Considering the limited number of ASD cases and the challenges posed by confounding, further studies are needed to corroborate the findings.

In the present study, the increased risk of ASD observed in former users but not in current users implied that indications for paternal SSRIs use may account for the observed association between paternal SSRIs use and ASD in children, which was supported by previous studies suggesting that parental depression and other psychiatric disorders might be associated with the risk of autism in children<sup>44-46</sup>.

1  
2  
3  
4 Therefore, similar to those studies which focused on the effect of maternal  
5  
6 antidepressants use during pregnancy, confounding by indication poses the main  
7  
8 challenge in our study. We adopted several analytic strategies to account for such  
9  
10 confounding by indication: (1) regression adjustment for paternal psychiatric  
11  
12 disorders; (2) negative controls (i.e., former-users analyses); (3) stratified analyses  
13  
14 according to paternal history of affective disorders; and (4) sibling analyses. The  
15  
16 results of these analyses suggested that paternal psychiatric illness rather than SSRIs  
17  
18 exposure might be associated with ASD liability. It was worth noting that, in children  
19  
20 born to fathers without affective disorders, there was a significantly increased risk  
21  
22 associated with paternal SSRIs use. Most fathers might receive SSRIs treatment from  
23  
24 their general practitioner and were therefore not registered with a diagnosis of  
25  
26 affective disorders in the hospital system. Therefore, it was possible that the increased  
27  
28 risk associated with prenatal SSRIs use was partly confounded by paternal affective  
29  
30 disorders diagnosed outside a hospital department for which we were not able to  
31  
32 adjust. In addition, other psychiatric diseases related to SSRIs use might also  
33  
34 contribute to the observed association.  
35  
36  
37  
38  
39  
40  
41  
42

43 Our study has several methodological strengths. One strength was that the linkage  
44  
45 of several nationwide health registries in Denmark enabled us to conduct a large  
46  
47 cohort study with virtually complete follow-up. The definition on exposure to SSRIs  
48  
49 was based on a national registry, which eliminated the risk of recall bias caused by  
50  
51 self-report. Another strength was that the information on ASD diagnosis was obtained  
52  
53 independently of exposure measurement, which could also mitigate the information  
54  
55  
56  
57  
58  
59  
60

1  
2  
3 bias. Furthermore, the availability of health registry data enabled us to adjust for a  
4  
5 number of potential confounders including sociodemographic factors as well as  
6  
7 parental psychiatric history. Besides, we have taken the potential effect of maternal  
8  
9 antidepressants use during pregnancy as well as maternal mental disease into  
10  
11 consideration. To remove the confounding factors attributing to mothers, we adjusted  
12  
13 the maternal SSRIs use in regression model, and also restricted the analyses to  
14  
15 children whose mothers neither received antidepressant medication during pregnancy  
16  
17 nor had affective disorders before child birth.  
18  
19  
20  
21  
22

23 Limitations need to be considered when interpreting the results of our study. Firstly,  
24  
25 we were unable to validate actual use of SSRIs by fathers during the time period of  
26  
27 interest because we relied on medical records of dispensed prescriptions. This may  
28  
29 lead to misclassification of exposure status because some people may not take the  
30  
31 medication or may take it later. Nevertheless, the misclassification was most likely  
32  
33 non-differential, which could bias the association toward null. Besides, some patients  
34  
35 may receive SSRIs treatment during inpatient admissions which are not included in  
36  
37 the prescription registry. We expect this problem to be minor since those inpatients  
38  
39 usually have severe psychiatric disorders and are more likely to continue treatment  
40  
41 after discharge. Secondly, the 3-month cut-off point was set based on the fact that  
42  
43 spermatogenesis takes approximately 70-90 days in humans. Whereas it may be  
44  
45 possible that SSRIs drugs induce sperm damage at the very primitive stage. However,  
46  
47 the results did not change markedly after extending the putative exposure period to  
48  
49 the last 6 months prior to conception (data not shown). Thirdly, ASD in children was  
50  
51  
52  
53  
54  
55  
56  
57  
58  
59  
60

1  
2  
3  
4 ascertained through the DNPR and the DPCRR, which did not include those children  
5  
6 who received the diagnosis of ASD from private psychiatrists or remained  
7  
8 undiagnosed at the end of the follow-up. However, the prevalence of ASD in our  
9  
10 cohort was 1.13%, which was similar to that reported in the United States during the  
11  
12 study period (1.14%)<sup>47</sup>. Hence the bias introduced by case identification was  
13  
14 expected to be minimal. Fourthly, the age of ASD diagnosis which was used as time  
15  
16 event in Cox regression models might be affected by external and extraneous factors.  
17  
18 If these factors are differentially distributed in exposed and unexposed group, the  
19  
20 actual associations may be biased. We have adjusted for some factors which may  
21  
22 influence age of diagnosis to reduce the bias to some extent. However, we could not  
23  
24 rule out the confounding effects of unmeasured factors, which is a limitation of the  
25  
26 study.  
27  
28  
29  
30  
31

### 32 33 **Conclusions**

34  
35 In the study, paternal SSRI use before conception was associated with an increased  
36  
37 risk of ASD in the offspring, especially in the former users who took SSRIs over the  
38  
39 longer term. However, null association were observed in exposed children with  
40  
41 paternal affective disorders, and similar ASD risk were observed among exposed and  
42  
43 unexposed siblings, which implicates that paternal underlying indications related to  
44  
45 SSRIs use or other unmeasured confounding factors may explain the increased risk.  
46  
47  
48

### 49 **Footnotes**

50  
51 This cohort study was approved by the Danish Data Protection Agency (Document No.  
52  
53 2013-41-2569).  
54  
55  
56  
57  
58  
59  
60

1  
2  
3  
4 **Contributors:** HL had full access to all the data in the study and took responsibility  
5  
6 for the integrity of the data and the accuracy of the data analysis. HL, WY and JL  
7  
8 conceptualized and designed the study, and MHM and VE helped with its  
9  
10 development. FY, LL and JPC conducted the statistical analysis. HL, JPC and FY  
11  
12 interpreted the results and FY drafted the initial manuscript. All authors reviewed the  
13  
14 manuscript and approved the final version as submitted.  
15  
16

17  
18 **Funding:** The study was supported by the National Natural Science Foundation of  
19  
20 China (81428011), the National Key Research and Development Program of China  
21  
22 (2016YFC1000505), the European Research Council  
23  
24 (ERC-2010-StG-260242-PROGEURO), Nordic Cancer Union (176673,186200),  
25  
26 Danish Council for Independent Research (DFF-6110-00019), Karen Elise Jensens  
27  
28 Fond (2016), and the Program for Clinical Research Infrastructure (PROCRIN)  
29  
30 established by the Lundbeck Foundation and the Novo Nordisk Foundation.  
31  
32

33  
34  
35 **Competing interests:** The authors declare that they have no conflict of interest.  
36  
37

38 **Statement of the independence of researchers from funders:** The funding sources  
39  
40 had no role in the design and conduct of the study; collection, management, analysis,  
41  
42 and interpretation of the data; and preparation, review, or approval of the manuscript;  
43  
44 and decision to submit the manuscript for publication. The researchers were  
45  
46 independent from the funders.  
47  
48

49  
50 **Ethical approval:** The study was based on secondary data. No individuals were  
51  
52 approached as a result of the study, nor did we access any other data from the  
53  
54 participants. This study was approved by the Danish Data Protection Agency  
55  
56  
57

(Document No. 2013-41-2569). All procedures performed in the study involving human participants were in accordance with the ethical standards of the institutional and/or national research committee and with the 1964 Helsinki declaration and its later amendments or comparable ethical standards. Approval by an institutional review board and informed consent are not required for registry-based research in Denmark.

**Data sharing statement:** No additional data are available.

## Reference

1. Organization WH. Depression [fact sheet no. 369]. 2012. As of September. 2015;30.
2. Alwan S, Friedman JM, Chambers C. Safety of selective serotonin reuptake inhibitors in pregnancy: a review of current evidence. *CNS drugs*. 2016;30(6):499-515.
3. Wen SW, Yang Q, Garner P, et al. Selective serotonin reuptake inhibitors and adverse pregnancy outcomes. *American journal of obstetrics and gynecology*. 2006;194(4):961-966.
4. Lund N, Pedersen LH, Henriksen TB. Selective serotonin reuptake inhibitor exposure in utero and pregnancy outcomes. *Archives of pediatrics & adolescent medicine*. 2009;163(10):949-954.
5. Pedersen LH, Henriksen TB, Vestergaard M, et al. Selective serotonin reuptake inhibitors in pregnancy and congenital malformations: population based cohort study. *Bmj*. 2009;339:b3569.
6. Oberlander TF, Reebye P, Misri S, et al. Externalizing and attentional behaviors in children of depressed mothers treated with a selective serotonin reuptake inhibitor antidepressant during pregnancy. *Archives of pediatrics & adolescent medicine*. 2007;161(1):22-29.
7. Nulman I, Koren G, Rovet J, et al. Neurodevelopment of children following prenatal exposure to venlafaxine, selective serotonin reuptake inhibitors, or untreated maternal depression. *American Journal of Psychiatry*. 2012;169(11):1165-1174.
8. Healy D, Le Noury J, Mangin D. Links between serotonin reuptake inhibition during pregnancy and neurodevelopmental delay/spectrum disorders: A systematic review of epidemiological and physiological evidence. *International Journal of Risk & Safety in Medicine*. 2016;28(3):125-141.
9. Clements CC, Castro VM, Blumenthal SR, et al. Prenatal antidepressant exposure is associated with risk for attention-deficit hyperactivity disorder but not autism spectrum disorder in a large health system. *Molecular psychiatry*. 2015;20(6):727-734.
10. Boukhris T, Sheehy O, Mottron L, et al. Antidepressant use during pregnancy and the risk of autism spectrum disorder in children. *JAMA pediatrics*. 2016;170(2):117-124.
11. Hadjikhani N. Serotonin, pregnancy and increased autism prevalence: is there a link? *Medical Hypotheses*. 2010;74(5):880-883.
12. Brown HK, Ray JG, Wilton AS, et al. Association Between Serotonergic Antidepressant Use During Pregnancy and Autism Spectrum Disorder in Children. *Jama*. 2017;317(15):1544-1552.
13. Sujan AC, Rickert ME, Öberg AS, et al. Associations of Maternal Antidepressant Use During the

1  
2  
3 First Trimester of Pregnancy With Preterm Birth, Small for Gestational Age, Autism Spectrum Disorder,  
4 and Attention-Deficit/Hyperactivity Disorder in Offspring. *Jama*. 2017;317(15):1553-1562.

5 14. Oberlander TF, Zwaigenbaum L. Disentangling Maternal Depression and Antidepressant Use  
6 During Pregnancy as Risks for Autism in Children. *Jama*. 2017;317(15):1533-1534.

7 15. Mezzacappa A, Lasica P-A, Gianfagna F, et al. Risk for Autism Spectrum Disorders According to  
8 Period of Prenatal Antidepressant Exposure: A Systematic Review and Meta-analysis. *JAMA pediatrics*.  
9 2017.

10 16. Baird G, Simonoff E, Pickles A, et al. Prevalence of disorders of the autism spectrum in a  
11 population cohort of children in South Thames: the Special Needs and Autism Project (SNAP). *The*  
12 *lancet*. 2006;368(9531):210-215.

13 17. Rutter M. Incidence of autism spectrum disorders: Changes over time and their meaning\*. *Acta*  
14 *paediatrica*. 2005;94(1):2-15.

15 18. Hill AP, Zuckerman K, Fombonne E. Epidemiology of autism spectrum disorders. *Translational*  
16 *Approaches to Autism Spectrum Disorder*: Springer 2015:13-38.

17 19. Newschaffer CJ, Croen LA, Daniels J, et al. The epidemiology of autism spectrum disorders\*.  
18 *Annu Rev Public Health*. 2007;28:235-258.

19 20. Brown HK, Hussain-Shamsy N, Lunskey Y, et al. The association between antenatal exposure to  
20 selective serotonin reuptake inhibitors and autism: a systematic review and meta-analysis. *The Journal*  
21 *of clinical psychiatry*. 2017;78(1):e48.

22 21. Gidaya NB, Lee BK, Burstyn I, et al. In utero exposure to selective serotonin reuptake inhibitors  
23 and risk for autism spectrum disorder. *Journal of autism and developmental disorders*.  
24 2014;44(10):2558-2567.

25 22. Croen LA, Grether JK, Yoshida CK, et al. Antidepressant use during pregnancy and childhood  
26 autism spectrum disorders. *Archives of general psychiatry*. 2011;68(11):1104-1112.

27 23. Rai D, Lee BK, Dalman C, et al. Parental depression, maternal antidepressant use during  
28 pregnancy, and risk of autism spectrum disorders: population based case-control study. 2013.

29 24. Rai D, Lee BK, Dalman C, et al. Antidepressants during pregnancy and autism in offspring:  
30 population based cohort study. *Bmj*. 2017;358:j2811.

31 25. Schirm E, Pedersen L, Tobi H, et al. Drug use among fathers around time of conception: two  
32 register based surveys from Denmark and The Netherlands. *Pharmacoepidemiology and drug safety*.  
33 2004;13(9):609-613.

34 26. Engeland A, Bramness JG, Daltveit AK, et al. Prescription drug use among fathers and mothers  
35 before and during pregnancy. A population - based cohort study of 106 000 pregnancies in Norway  
36 2004 - 2006. *British journal of clinical pharmacology*. 2008;65(5):653-660.

37 27. Crijns I, Bos J, Knol M, et al. Paternal drug use: before and during pregnancy. *Expert opinion on*  
38 *drug safety*. 2012;11(4):513-518.

39 28. Tanrikut C, Feldman AS, Altemus M, et al. Adverse effect of paroxetine on sperm. *Fertility and*  
40 *sterility*. 2010;94(3):1021-1026.

41 29. Safarinejad MR. Sperm DNA damage and semen quality impairment after treatment with  
42 selective serotonin reuptake inhibitors detected using semen analysis and sperm chromatin structure  
43 assay. *The Journal of urology*. 2008;180(5):2124-2128.

44 30. Lewis S, Aitken R. DNA damage to spermatozoa has impacts on fertilization and pregnancy. *Cell*  
45 *and tissue research*. 2005;322(1):33-41.

46 31. Pedersen CB, Gøtzsche H, Møller JØ, et al. The Danish civil registration system. *Dan Med Bull*.  
47  
48  
49  
50  
51  
52  
53  
54  
55  
56  
57  
58  
59  
60

- 2006;53(4):441-449.
32. Knudsen LB, Olsen J. The Danish Medical Birth Registry. *Danish medical bulletin*. 1998;45(3):320-323.
33. Kildemoes HW, Sørensen HT, Hallas J. The Danish national prescription registry. *Scandinavian journal of public health*. 2011;39(7 suppl):38-41.
34. Cordier S. Evidence for a role of paternal exposures in developmental toxicity. *Basic & clinical pharmacology & toxicology*. 2008;102(2):176-181.
35. Mors O, Perto GP, Mortensen PB. The Danish psychiatric central research register. *Scandinavian journal of public health*. 2011;39(7 suppl):54-57.
36. Andersen TF, Madsen M, Jørgensen J, et al. The Danish National Hospital Register. A valuable source of data for modern health sciences. *Danish medical bulletin*. 1999;46(3):263-268.
37. Lauritsen MB, Jørgensen M, Madsen KM, et al. Validity of childhood autism in the Danish Psychiatric Central Register: findings from a cohort sample born 1990–1999. *Journal of autism and developmental disorders*. 2010;40(2):139-148.
38. Christensen J, Parner ET, Vestergaard M. Antidepressant exposure in pregnancy and risk of autism spectrum disorders. *Clinical epidemiology*. 2013;5:449-459.
39. Hviid A, Melbye M, Pasternak B. Use of selective serotonin reuptake inhibitors during pregnancy and risk of autism. *New England Journal of Medicine*. 2013;369(25):2406-2415.
40. Maciag D, Simpson KL, Coppinger D, et al. Neonatal antidepressant exposure has lasting effects on behavior and serotonin circuitry. *Neuropsychopharmacology*. 2006;31(1):47-57.
41. Bonnin A, Levitt P. Fetal, maternal and placental sources of serotonin and new implications for developmental programming of the brain. *Neuroscience*. 2011;197:1.
42. Tanrikut C, Schlegel PN. Antidepressant-associated changes in semen parameters. *Urology*. 2007;69(1):185. e185-185. e187.
43. Elmazoudy R, Abdelhameed N, Elmasry A. Paternal dapoxetine administration induced deterioration in reproductive performance, fetal outcome, sexual behavior and biochemistry of male rats. *International Journal of Impotence Research*. 2015;27(6).
44. Daniels JL, Forssen U, Hultman CM, et al. Parental psychiatric disorders associated with autism spectrum disorders in the offspring. *Pediatrics*. 2008;121(5):e1357-e1362.
45. Larsson HJ, Eaton WW, Madsen KM, et al. Risk factors for autism: perinatal factors, parental psychiatric history, and socioeconomic status. *American journal of epidemiology*. 2005;161(10):916-925.
46. Jokiranta E, Brown AS, Heinimaa M, et al. Parental psychiatric disorders and autism spectrum disorders. *Psychiatry research*. 2013;207(3):203-211.
47. Kogan MD, Blumberg SJ, Schieve LA, et al. Prevalence of parent-reported diagnosis of autism spectrum disorder among children in the US, 2007. *Pediatrics*. 2009;124(5):1395-1403.



**Table 1. Baseline Characteristics of the study population**

| <b>Characteristic</b>                               | <b>Paternal SSRIs use during the last 3 months prior to conception<br/>(N=6,870)</b> | <b>No paternal SSRIs use during the last 3 months prior to conception<br/>(N=663, 052)</b> |
|-----------------------------------------------------|--------------------------------------------------------------------------------------|--------------------------------------------------------------------------------------------|
| <b>Calendar Year of birth, No. (%)</b>              |                                                                                      |                                                                                            |
| 1998-2000                                           | 1,021(14.9)                                                                          | 185,784(28.0)                                                                              |
| 2001-2003                                           | 1,526(22.2)                                                                          | 179,952(27.1)                                                                              |
| 2004-2006                                           | 2,305(33.5)                                                                          | 178,664(27.0)                                                                              |
| 2007-2008                                           | 2,018(29.4)                                                                          | 118,652(17.9)                                                                              |
| <b>Gender, No. (%)</b>                              |                                                                                      |                                                                                            |
| Boy                                                 | 3,549(51.7)                                                                          | 340,194(51.3)                                                                              |
| Girl                                                | 3,321(48.3)                                                                          | 322,858(48.7)                                                                              |
| <b>Birth Weight (g), No. (%)</b>                    |                                                                                      |                                                                                            |
| <2500                                               | 278(4.1)                                                                             | 22,315(3.4)                                                                                |
| 2500-3250                                           | 1,729(25.2)                                                                          | 154,494(23.3)                                                                              |
| 3250-4000                                           | 3,582(52.1)                                                                          | 348,853(52.6)                                                                              |
| 4000-8000                                           | 1,243(18.1)                                                                          | 132,343(19.9)                                                                              |
| Unknown                                             | 38(0.5)                                                                              | 5,047(0.8)                                                                                 |
| <b>Parity, No. (%)</b>                              |                                                                                      |                                                                                            |
| 1                                                   | 2,693(39.2)                                                                          | 282,895(42.7)                                                                              |
| 2                                                   | 2,433(35.4)                                                                          | 250,496(37.8)                                                                              |
| ≥3                                                  | 1,744(25.4)                                                                          | 129,661(19.5)                                                                              |
| <b>Preterm Birth, No. (%)</b><br>(<37 weeks)        |                                                                                      |                                                                                            |
| No                                                  | 6,489(94.4)                                                                          | 630,851(95.1)                                                                              |
| Yes                                                 | 381(5.6)                                                                             | 32,201(4.9)                                                                                |
| <b>Apgar score at 5 minutes, No. (%)</b>            |                                                                                      |                                                                                            |
| 0-7                                                 | 91(1.3)                                                                              | 8,224(1.2)                                                                                 |
| 8-9                                                 | 442(6.4)                                                                             | 39,941(6.0)                                                                                |
| 10                                                  | 6,269(91.3)                                                                          | 607,634(91.7)                                                                              |
| Unknown                                             | 68(1.0)                                                                              | 7,253(1.1)                                                                                 |
| <b>Maternal age at child birth (years), No. (%)</b> |                                                                                      |                                                                                            |
| ≤25                                                 | 958(13.9)                                                                            | 99,273(15.0)                                                                               |
| 26-30                                               | 2,238(32.6)                                                                          | 244,419(36.9)                                                                              |
| 31-35                                               | 2,386(34.7)                                                                          | 225,610(34.0)                                                                              |
| >35                                                 | 1,288(18.8)                                                                          | 93,750(14.1)                                                                               |
| <b>Paternal age at child birth (years), No. (%)</b> |                                                                                      |                                                                                            |
| ≤25                                                 | 364(5.3)                                                                             | 47,490(7.2)                                                                                |
| 26-30                                               | 1,434(20.9)                                                                          | 180,612(27.2)                                                                              |
| 31-35                                               | 2,395(34.8)                                                                          | 242,702(36.6)                                                                              |
| >35                                                 | 2,677(39.0)                                                                          | 192,248(29.0)                                                                              |

**Table 1. Baseline Characteristics of the study population (continued)**

| <b>Maternal smoking status<sup>a</sup>, No. (%)</b>      |              |               |
|----------------------------------------------------------|--------------|---------------|
| No                                                       | 4,326(63.0)  | 477,574(72.0) |
| Yes                                                      | 1,334(19.4)  | 106,233(16.0) |
| Unknown                                                  | 1,210(17.6)  | 79,245(12.0)  |
| <b>Maternal AD use during pregnancy, No. (%)</b>         |              |               |
| No                                                       | 6,548(94.0)  | 653,496(98.6) |
| Yes                                                      | 412(6.0)     | 9,556(1.4)    |
| <b>Maternal history of Affective disorder, No. (%)</b>   |              |               |
| No                                                       | 6,607(96.2)  | 654,234(98.7) |
| Yes                                                      | 263(3.8)     | 8,818(1.3)    |
| <b>Paternal history of Affective disorder, No. (%)</b>   |              |               |
| No                                                       | 6,099 (88.8) | 659,639(99.5) |
| Yes                                                      | 771(11.2)    | 3,413(0.5)    |
| <b>Maternal history of psychiatric disorder, No. (%)</b> |              |               |
| No                                                       | 6,175(89.9)  | 626,840(94.5) |
| Yes                                                      | 695(10.1)    | 36,212(5.5)   |
| <b>Paternal history of psychiatric disorder, No. (%)</b> |              |               |
| No                                                       | 5,092 (74.1) | 630,990(95.2) |
| Yes                                                      | 1,178(25.9)  | 32,062(4.8)   |

**Abbreviations:** SSRI, selective serotonin reuptake inhibitor; N, number; AD, antidepressant drugs;

<sup>a</sup> Maternal smoking information was missing among those children born from 2007 to 2008.

**Table 2. Association between paternal SSRIs use before conception and ASD in offspring**

| Paternal SSRIs use before conception                                   | Offspring with ASD no. | Follow-up no. of person-yr | Hazard Ratio (95% CI) |                      |                      |
|------------------------------------------------------------------------|------------------------|----------------------------|-----------------------|----------------------|----------------------|
|                                                                        |                        |                            | Crude                 | Model 1 <sup>a</sup> | Model 2 <sup>b</sup> |
| No use during the last 3 months prior to conception                    | 7,473                  | 6,765,205                  | Ref                   | Ref                  | Ref                  |
| Use during the last 3 months prior to conception                       | 104                    | 61,555                     | 1.62(1.33-1.96)       | 1.54(1.27-1.88)      | 1.43(1.18-1.74)      |
| <b>Sub-analysis:</b>                                                   |                        |                            |                       |                      |                      |
| <b>Paternal SSRIs use during the last 1 year before conception</b>     |                        |                            |                       |                      |                      |
| No use during the last 1 year prior to conception                      | 7,429                  | 6,736,654                  | Ref                   | Ref                  | Ref                  |
| Use only from the last 1 year to the last 3 months prior to conception | 71                     | 39,422                     | 1.71(1.35-2.16)       | 1.66(1.31-2.09)      | 1.54(1.21-1.94)      |
| Use only during the last 3 months prior to conception                  | 20                     | 14,738                     | 1.29(0.83-2.00)       | 1.24 (0.80-1.93)     | 1.17(0.75-1.82)      |
| Use both before and during the last 3 months prior to conception       | 57                     | 35,946                     | 1.52(1.17-1.97)       | 1.43(1.10-1.86)      | 1.32(1.02-1.72)      |

**Abbreviations:** AD, antidepressant drugs; SSRI, selective serotonin reuptake inhibitor; ASD, Autism Spectrum Disorder; No., number; HR, Hazard Ratio

<sup>a</sup> Adjusted for calendar year of birth, sex, parity, mother age, father age, maternal smoking, mother psychiatric history, maternal AD use during pregnancy

<sup>b</sup> Model 1 further adjusted for father psychiatric history

**Table 3. Association between paternal SSRIs use before conception and ASD in offspring born to fathers diagnosed with affective disorder or not**

| Paternal SSRIs use before conception                                   | Offspring with ASD no. | Follow-up no. of person-yr | Hazard Ratio (95% CI) |                      |                      |
|------------------------------------------------------------------------|------------------------|----------------------------|-----------------------|----------------------|----------------------|
|                                                                        |                        |                            | Crude                 | Model 1 <sup>a</sup> | Model 2 <sup>b</sup> |
| <b>Fathers with affective disorder</b>                                 |                        |                            |                       |                      |                      |
| No use during the last 3 months prior to conception                    | 58                     | 30,908                     | Ref                   | Ref                  | Ref                  |
| Use during the last 3 months prior to conception                       | 14                     | 6,625                      | 1.17(0.65-2.09)       | 1.10(0.61-1.98)      | 1.10(0.61-1.98)      |
| <i>Sub-analysis:</i>                                                   |                        |                            |                       |                      |                      |
| <i>Paternal SSRIs use during the last 1 year before conception</i>     |                        |                            |                       |                      |                      |
| No use during the last 1 year prior to conception                      | 53                     | 28,033                     | Ref                   | Ref                  | Ref                  |
| Use only from the last 1 year to the last 3 months prior to conception | 8                      | 4,082                      | 1.07(0.51-2.25)       | 1.08(0.51-2.30)      | 1.08(0.51-2.30)      |
| Use only during the last 3 months prior to conception                  | 2                      | 1,164                      | 0.91(0.22-3.75)       | 0.89(0.21-3.75)      | 0.89(0.21-3.75)      |
| Use both before and during the last 3 months prior to conception       | 9                      | 4,254                      | 1.16(0.57-2.35)       | 1.10(0.55-2.22)      | 1.10(0.55-2.22)      |
| <b>Fathers without affective disorder</b>                              |                        |                            |                       |                      |                      |
| No use during the last 3 months prior to conception                    | 7,415                  | 6,752,899                  | Ref                   | Ref                  | Ref                  |
| Use during the last 3 months prior to conception                       | 90                     | 36,329                     | 1.57(1.27-1.93)       | 1.52(1.23-1.87)      | 1.45(1.18-1.79)      |
| <i>Sub-analysis:</i>                                                   |                        |                            |                       |                      |                      |
| <i>Paternal SSRIs use during the last 1 year before conception</i>     |                        |                            |                       |                      |                      |
| No use during the last 1 year prior to conception                      | 7,376                  | 6,714,926                  | Ref                   | Ref                  | Ref                  |
| Use only from the last 1 year to the last 3 months prior to conception | 63                     | 37,973                     | 1.69(1.32-2.17)       | 1.64(1.28-2.11)      | 1.57(1.23-2.02)      |
| Use only during the last 3 months prior to conception                  | 18                     | 7,354                      | 1.26(0.79-2.00)       | 1.23(0.77-1.95)      | 1.19(0.75-1.88)      |
| Use both before and during the last 3 months prior to conception       | 48                     | 28,974                     | 1.45(1.09-1.93)       | 1.38(1.04-1.84)      | 1.32(0.99-1.76)      |

**Abbreviations:** AD, antidepressant drugs; SSRI, selective serotonin reuptake inhibitor; ASD, Autism Spectrum Disorder; No., number; HR, Hazard Ratio

<sup>a</sup> Adjusted for calendar year of birth, parity, mother age, father age, maternal smoking, mother psychiatric history, maternal AD use during pregnancy

<sup>b</sup> Model 1 further adjusted for father psychiatric history

**Table 4. Paternal SSRI use before pregnancy and ASD in exposed and unexposed siblings from 5,479 families**

| Paternal SSRIs use before conception                | Number of offspring no. | Offspring with ASD no. | Hazard Ratio (95% CI) |                      |
|-----------------------------------------------------|-------------------------|------------------------|-----------------------|----------------------|
|                                                     |                         |                        | Crude                 | Model 1 <sup>a</sup> |
| No use during the last 3 months prior to conception | 2,792                   | 45                     | Ref                   | Ref                  |
| Use during the last 3 months prior to conception    | 2,687                   | 23                     | 0.53(0.31-0.91)       | 0.74(0.34-1.59)      |

**Abbreviations:** AD, antidepressant drugs; SSRI, selective serotonin reuptake inhibitor; ASD, Autism Spectrum Disorder; No., number; HR, Hazard Ratio

<sup>a</sup> Adjusted for sex, parity, mother age, father age, maternal smoking, maternal AD use during pregnancy

**TablesS1. Association between paternal SSRIs use before conception and ASD in offspring: analyses stratified by gender**

| Paternal SSRIs use before conception                                   | Offspring with ASD no. | Follow-up no. of person-yr | Hazard Ratio (95% CI) |                      |                      |
|------------------------------------------------------------------------|------------------------|----------------------------|-----------------------|----------------------|----------------------|
|                                                                        |                        |                            | Crude                 | Model 1 <sup>a</sup> | Model 2 <sup>b</sup> |
| <b>Boys</b>                                                            |                        |                            |                       |                      |                      |
| No use during the last 3 months prior to conception                    | 6,005                  | 3,459,592                  | Ref                   | Ref                  | Ref                  |
| Use during the last 3 months prior to conception                       | 84                     | 31,642                     | 1.61(1.30-2.00)       | 1.55(1.25-1.92)      | 1.44(1.16-1.79)      |
| <i>Sub-analysis:</i>                                                   |                        |                            |                       |                      |                      |
| <i>Paternal SSRIs use during the last 1 year before conception</i>     |                        |                            |                       |                      |                      |
| No use during the last 1 year prior to conception                      | 5,969                  | 3,444,956                  | Ref                   | Ref                  | Ref                  |
| Use only from the last 1 year to the last 3 months prior to conception | 58                     | 20,031                     | 1.74(1.34-2.25)       | 1.69(1.30-2.19)      | 1.58(1.22-2.05)      |
| Use only during the last 3 months prior to conception                  | 18                     | 7,622                      | 1.42(0.89-2.26)       | 1.39(0.87-2.21)      | 1.31(0.83-2.09)      |
| Use both before and during the last 3 months prior to conception       | 44                     | 18,623                     | 1.44 (1.07-1.93)      | 1.36(1.01-1.84)      | 1.26(0.94-1.71)      |
| <b>Girls</b>                                                           |                        |                            |                       |                      |                      |
| No use during the last 3 months prior to conception                    | 1,468                  | 3,305,613                  | Ref                   | Ref                  | Ref                  |
| Use during the last 3 months prior to conception                       | 20                     | 29,914                     | 1.63(1.05-2.53)       | 1.54(0.99-2.40)      | 1.41(0.90-2.20)      |
| <i>Sub-analysis:</i>                                                   |                        |                            |                       |                      |                      |
| <i>Paternal SSRIs use during the last 1 year before conception</i>     |                        |                            |                       |                      |                      |
| No use during the last 1 year prior to conception                      | 1,460                  | 3,291,698                  | Ref                   | Ref                  | Ref                  |
| Use only from the last 1 year to the last 3 months prior to conception | 13                     | 19,390                     | 1.61(0.93-2.78)       | 1.53(0.88-2.64)      | 1.37(0.79-2.38)      |
| Use only during the last 3 months prior to conception                  | 2                      | 7,116                      | 0.67(0.17-2.69)       | 0.64(0.16-2.55)      | 0.59(0.15-2.36)      |
| Use both before and during the last 3 months prior to conception       | 13                     | 75,323                     | 1.84(1.06-3.17)       | 1.74(1.01-3.01)      | 1.59(0.92-2.75)      |

**Abbreviations:** AD, antidepressant drugs; SSRI, selective serotonin reuptake inhibitor; ASD, Autism Spectrum Disorder; No., number; HR, Hazard Ratio

<sup>a</sup> Adjusted for calendar year of birth, parity, mother age, father age, maternal smoking, mother psychiatric history, maternal AD use during pregnancy

<sup>b</sup> Model 1 further adjusted for father psychiatric history

**Table S2. Association between paternal SSRIs use before conception and ASD in offspring born to mother who neither received antidepressants medication during pregnancy nor had affective disorders before birth of child**

| Paternal SSRIs use before conception                                   | Offspring with ASD no. | Follow-up no. of person-yr | Hazard Ratio (95% CI) |                      |                      |
|------------------------------------------------------------------------|------------------------|----------------------------|-----------------------|----------------------|----------------------|
|                                                                        |                        |                            | Crude                 | Model 1 <sup>a</sup> | Model 2 <sup>b</sup> |
| No use during the last 3 months prior to conception                    | 7,184                  | 6,627,720                  | Ref                   | Ref                  | Ref                  |
| Use during the last 3 months prior to conception                       | 91                     | 57,081                     | 1.55(1.26-1.91)       | 1.57(1.28-1.93)      | 1.45(1.18-1.79)      |
| <b>Sub-analysis:</b>                                                   |                        |                            |                       |                      |                      |
| <b>Paternal SSRIs use during the last 1 year before conception</b>     |                        |                            |                       |                      |                      |
| No use during the last 1 year prior to conception                      | 7,144                  | 6,600,852                  | Ref                   | Ref                  | Ref                  |
| Use only from the last 1 year to the last 3 months prior to conception | 64                     | 37,032                     | 1.67(1.30-2.13)       | 1.68(1.31-2.15)      | 1.56(1.22-1.99)      |
| Use only during the last 3 months prior to conception                  | 16                     | 13,634                     | 1.13(0.69-1.85)       | 1.15(0.71-1.89)      | 1.08(0.66-1.77)      |
| Use both before and during the last 3 months prior to conception       | 51                     | 33,283                     | 1.50(1.13-1.97)       | 1.50(1.13-1.97)      | 1.38(1.05-1.82)      |

**Abbreviations:** AD, antidepressant drugs; SSRI, selective serotonin reuptake inhibitor; ASD, Autism Spectrum Disorder; No., number; HR, Hazard Ratio

<sup>a</sup> Adjusted for calendar year of birth, parity, mother age, father age, maternal smoking, mother psychiatric history

<sup>b</sup> Model 1 further adjusted for father psychiatric history

## STROBE Statement—checklist of items that should be included in reports of observational studies

|                              | Item No | Recommendation                                                                                                                                                                                                                                                                                                                                                                                                                                                         | Page No.       |
|------------------------------|---------|------------------------------------------------------------------------------------------------------------------------------------------------------------------------------------------------------------------------------------------------------------------------------------------------------------------------------------------------------------------------------------------------------------------------------------------------------------------------|----------------|
| <b>Title and abstract</b>    | 1       | (a) Indicate the study's design with a commonly used term in the title or the abstract                                                                                                                                                                                                                                                                                                                                                                                 | 2              |
|                              |         | (b) Provide in the abstract an informative and balanced summary of what was done and what was found                                                                                                                                                                                                                                                                                                                                                                    | 2-3            |
| <b>Introduction</b>          |         |                                                                                                                                                                                                                                                                                                                                                                                                                                                                        |                |
| Background/rationale         | 2       | Explain the scientific background and rationale for the investigation being reported                                                                                                                                                                                                                                                                                                                                                                                   | 4              |
| Objectives                   | 3       | State specific objectives, including any prespecified hypotheses                                                                                                                                                                                                                                                                                                                                                                                                       | 5              |
| <b>Methods</b>               |         |                                                                                                                                                                                                                                                                                                                                                                                                                                                                        |                |
| Study design                 | 4       | Present key elements of study design early in the paper                                                                                                                                                                                                                                                                                                                                                                                                                | 6              |
| Setting                      | 5       | Describe the setting, locations, and relevant dates, including periods of recruitment, exposure, follow-up, and data collection                                                                                                                                                                                                                                                                                                                                        | 6-8            |
| Participants                 | 6       | (a) <i>Cohort study</i> —Give the eligibility criteria, and the sources and methods of selection of participants. Describe methods of follow-up<br><i>Case-control study</i> —Give the eligibility criteria, and the sources and methods of case ascertainment and control selection. Give the rationale for the choice of cases and controls<br><i>Cross-sectional study</i> —Give the eligibility criteria, and the sources and methods of selection of participants | 6-8            |
|                              |         | (b) <i>Cohort study</i> —For matched studies, give matching criteria and number of exposed and unexposed<br><i>Case-control study</i> —For matched studies, give matching criteria and the number of controls per case                                                                                                                                                                                                                                                 |                |
| Variables                    | 7       | Clearly define all outcomes, exposures, predictors, potential confounders, and effect modifiers. Give diagnostic criteria, if applicable                                                                                                                                                                                                                                                                                                                               | 6-8            |
| Data sources/<br>measurement | 8*      | For each variable of interest, give sources of data and details of methods of assessment (measurement). Describe comparability of assessment methods if there is more than one group                                                                                                                                                                                                                                                                                   | 6-8            |
| Bias                         | 9       | Describe any efforts to address potential sources of bias                                                                                                                                                                                                                                                                                                                                                                                                              | 8-10           |
| Study size                   | 10      | Explain how the study size was arrived at                                                                                                                                                                                                                                                                                                                                                                                                                              | 10             |
| Quantitative<br>variables    | 11      | Explain how quantitative variables were handled in the analyses. If applicable, describe which groupings were chosen and why                                                                                                                                                                                                                                                                                                                                           | 8-9            |
| Statistical methods          | 12      | (a) Describe all statistical methods, including those used to control for confounding                                                                                                                                                                                                                                                                                                                                                                                  | 8-10           |
|                              |         | (b) Describe any methods used to examine subgroups and interactions                                                                                                                                                                                                                                                                                                                                                                                                    | 9              |
|                              |         | (c) Explain how missing data were addressed                                                                                                                                                                                                                                                                                                                                                                                                                            | 9              |
|                              |         | (d) <i>Cohort study</i> —If applicable, explain how loss to follow-up was addressed<br><i>Case-control study</i> —If applicable, explain how matching of cases and controls was addressed<br><i>Cross-sectional study</i> —If applicable, describe analytical methods taking account of sampling strategy                                                                                                                                                              | Not applicable |
|                              |         | (e) Describe any sensitivity analyses                                                                                                                                                                                                                                                                                                                                                                                                                                  | 9-10           |



| <b>Results</b>           |     |                                                                                                                                                                                                              |                |
|--------------------------|-----|--------------------------------------------------------------------------------------------------------------------------------------------------------------------------------------------------------------|----------------|
| Participants             | 13* | (a) Report numbers of individuals at each stage of study—eg numbers potentially eligible, examined for eligibility, confirmed eligible, included in the study, completing follow-up, and analysed            | 10             |
|                          |     | (b) Give reasons for non-participation at each stage                                                                                                                                                         | Not applicable |
|                          |     | (c) Consider use of a flow diagram                                                                                                                                                                           |                |
| Descriptive data         | 14* | (a) Give characteristics of study participants (eg demographic, clinical, social) and information on exposures and potential confounders                                                                     | 10             |
|                          |     | (b) Indicate number of participants with missing data for each variable of interest                                                                                                                          | 22             |
|                          |     | (c) <i>Cohort study</i> —Summarise follow-up time (eg, average and total amount)                                                                                                                             | 11             |
| Outcome data             | 15* | <i>Cohort study</i> —Report numbers of outcome events or summary measures over time                                                                                                                          | 10-11          |
|                          |     | <i>Case-control study</i> —Report numbers in each exposure category, or summary measures of exposure                                                                                                         |                |
|                          |     | <i>Cross-sectional study</i> —Report numbers of outcome events or summary measures                                                                                                                           |                |
| Main results             | 16  | (a) Give unadjusted estimates and, if applicable, confounder-adjusted estimates and their precision (eg, 95% confidence interval). Make clear which confounders were adjusted for and why they were included | 11             |
|                          |     | (b) Report category boundaries when continuous variables were categorized                                                                                                                                    | 21             |
|                          |     | (c) If relevant, consider translating estimates of relative risk into absolute risk for a meaningful time period                                                                                             | Not relevant   |
| Other analyses           | 17  | Report other analyses done—eg analyses of subgroups and interactions, and sensitivity analyses                                                                                                               | 11-12          |
| <b>Discussion</b>        |     |                                                                                                                                                                                                              |                |
| Key results              | 18  | Summarise key results with reference to study objectives                                                                                                                                                     | 12             |
| Limitations              | 19  | Discuss limitations of the study, taking into account sources of potential bias or imprecision. Discuss both direction and magnitude of any potential bias                                                   | 15-16          |
| Interpretation           | 20  | Give a cautious overall interpretation of results considering objectives, limitations, multiplicity of analyses, results from similar studies, and other relevant evidence                                   | 13-14          |
| Generalisability         | 21  | Discuss the generalisability (external validity) of the study results                                                                                                                                        | 14-15          |
| <b>Other information</b> |     |                                                                                                                                                                                                              |                |
| Funding                  | 22  | Give the source of funding and the role of the funders for the present study and, if applicable, for the original study on which the present article is based                                                | 17             |

\*Give information separately for cases and controls in case-control studies and, if applicable, for exposed and unexposed groups in cohort and cross-sectional studies.

**Note:** An Explanation and Elaboration article discusses each checklist item and gives methodological background and published examples of transparent reporting. The STROBE checklist is best used in conjunction with this article (freely available on the Web sites of PLoS Medicine at <http://www.plosmedicine.org/>, Annals of Internal Medicine at <http://www.annals.org/>, and Epidemiology at <http://www.epidem.com/>). Information on the STROBE Initiative is available at [www.strobe-statement.org](http://www.strobe-statement.org).

# BMJ Open

## Risk of autism spectrum disorder in offspring following paternal use of selective serotonin reuptake inhibitors before conception: a population-based cohort study

|                                 |                                                                                                                                                                                                                                                                                                                                                                                                                                                                                                                                                                                                                                                                                                                                                                                                                                                                                                                                                                                                                                                                                                                                                                                                        |
|---------------------------------|--------------------------------------------------------------------------------------------------------------------------------------------------------------------------------------------------------------------------------------------------------------------------------------------------------------------------------------------------------------------------------------------------------------------------------------------------------------------------------------------------------------------------------------------------------------------------------------------------------------------------------------------------------------------------------------------------------------------------------------------------------------------------------------------------------------------------------------------------------------------------------------------------------------------------------------------------------------------------------------------------------------------------------------------------------------------------------------------------------------------------------------------------------------------------------------------------------|
| Journal:                        | <i>BMJ Open</i>                                                                                                                                                                                                                                                                                                                                                                                                                                                                                                                                                                                                                                                                                                                                                                                                                                                                                                                                                                                                                                                                                                                                                                                        |
| Manuscript ID                   | bmjopen-2017-016368.R3                                                                                                                                                                                                                                                                                                                                                                                                                                                                                                                                                                                                                                                                                                                                                                                                                                                                                                                                                                                                                                                                                                                                                                                 |
| Article Type:                   | Research                                                                                                                                                                                                                                                                                                                                                                                                                                                                                                                                                                                                                                                                                                                                                                                                                                                                                                                                                                                                                                                                                                                                                                                               |
| Date Submitted by the Author:   | 10-Nov-2017                                                                                                                                                                                                                                                                                                                                                                                                                                                                                                                                                                                                                                                                                                                                                                                                                                                                                                                                                                                                                                                                                                                                                                                            |
| Complete List of Authors:       | <p>Yang, Fen; Shanghai Institute of Planned Parenthood Research, Department of Reproductive Epidemiology and Social Science; Aarhus Universitetshospital, Department of Clinical Epidemiology</p> <p>Chen, Jianping; Shanghai Institute of Planned Parenthood Research, Department of Reproductive Epidemiology and Social Science</p> <p>Miao, Mao-Hua; Shanghai Institute of Planned Parenthood Research, Department of Reproductive Epidemiology and Social Science, National Population and Family Planning Key Laboratory of Contraceptive Drugs and Devices</p> <p>Yuan, Wei; Shanghai Institute of Planned Parenthood Research, Reproductive Epidemiology, National Population and Family Planning Key Laboratory of Contraceptive Drugs and Devices</p> <p>Li, Lin; Shanghai Institute of Planned Parenthood Research</p> <p>Liang, Hong; Shanghai Institute of Planned Parenthood Research, Department of Reproductive Epidemiology and Social Science, National Population and Family Planning Key Laboratory of Contraceptive Drugs and Devices</p> <p>Ehrenstein, Vera; Aarhus Universitetshospital</p> <p>Li, Jiong; Aarhus Universitetshospital, Department of Clinical Epidemiology</p> |
| <b>Primary Subject Heading</b>: | Public health                                                                                                                                                                                                                                                                                                                                                                                                                                                                                                                                                                                                                                                                                                                                                                                                                                                                                                                                                                                                                                                                                                                                                                                          |
| Secondary Subject Heading:      | Mental health                                                                                                                                                                                                                                                                                                                                                                                                                                                                                                                                                                                                                                                                                                                                                                                                                                                                                                                                                                                                                                                                                                                                                                                          |
| Keywords:                       | MENTAL HEALTH, Child & adolescent psychiatry < PSYCHIATRY, Adult psychiatry < PSYCHIATRY, NEUROPATHOLOGY                                                                                                                                                                                                                                                                                                                                                                                                                                                                                                                                                                                                                                                                                                                                                                                                                                                                                                                                                                                                                                                                                               |
|                                 |                                                                                                                                                                                                                                                                                                                                                                                                                                                                                                                                                                                                                                                                                                                                                                                                                                                                                                                                                                                                                                                                                                                                                                                                        |

SCHOLARONE™  
Manuscripts

1  
2  
3 **Risk of autism spectrum disorder in offspring following paternal use of selective**  
4 **serotonin reuptake inhibitors before conception: a population-based cohort**  
5  
6 **study**  
7  
8  
9

10 Fen Yang<sup>1,2</sup>; Jianping Chen<sup>1</sup>; Maohua Miao<sup>1</sup>; Wei Yuan<sup>1</sup>; Lin Li<sup>1</sup>; Hong Liang<sup>1</sup>; Vera  
11 Ehrenstein<sup>2</sup>; Jiong Li<sup>2</sup>  
12  
13  
14  
15

16  
17  
18 **Author Affiliation**  
19

20 <sup>1</sup>Key Lab. of Reproduction Regulation of NPFPC, SIPPR, IRD, Fudan University,  
21 Shanghai, 200032, China  
22  
23

24 <sup>2</sup>Department of Clinical Epidemiology, Aarhus University Hospital, Olof Palmes Alle  
25 43-45, DK-8200 Aarhus N, Denmark  
26  
27  
28  
29

30  
31  
32  
33 **Corresponding Author**  
34

35 Hong Liang, MD, PhD  
36

37 Key Lab. of Reproduction Regulation of NPFPC, SIPPR, IRD, Fudan University,  
38 #779 Lao Hu Min Road, Shanghai, 200032, China.  
39  
40

41 Email: [lucylhcn@163.com](mailto:lucylhcn@163.com);  
42

43 Phone number: 86 -21-64771683  
44  
45  
46  
47  
48  
49  
50  
51  
52  
53  
54  
55  
56  
57  
58  
59  
60

## Abstract

### Objective

The present study aimed to examine the association between paternal selective serotonin reuptake inhibitors (SSRIs) use before conception and the risk of autism spectrum disorder (ASD) in offspring.

### Design

A population-based cohort study

### Methods

We conducted a cohort study of 669,922 children born from 1998 to 2008, with follow-up throughout 2013. Based on Danish national registers, we linked information on paternal use of SSRIs, ASD diagnosed in children, and a range of potential confounders. The children whose fathers used SSRIs during the last 3 months prior to conception were identified as the exposed. Cox regression model was used to estimate the hazard ratio (HR) for ASD in children.

### Results

Compared with unexposed children, the exposed had a 1.62-fold higher risk of ASD (95% confidence interval [CI]: 1.33-1.96) and the risk attenuated after adjusting for potential confounders, especially fathers' psychiatric conditions (HR=1.43, 95% CI: 1.18-1.74). When extending the exposure window to 1 year before conception, the increased risk persisted in children of fathers using SSRIs only from the last year till the last 3 months prior to conception (HR=1.54, 95%CI: 1.21-1.94) but not in children of fathers using SSRIs only during the last 3 months prior to conception

1  
2  
3 (HR=1.17, 95%CI: 0.75-1.82). We also performed stratified analyses according to  
4  
5  
6 paternal history of affective disorders and observed no increased ASD risk among  
7  
8 children whose father had affective disorders. Besides, the sibling analysis showed  
9  
10 that the ASD risk did not increase among exposed children compared with their  
11  
12 unexposed siblings.  
13  
14

### 15 **Conclusions**

16  
17  
18 The mildly increased risk of ASD in the offspring associated with paternal SSRIs use  
19  
20 before conception may be attributable to paternal underlying psychiatric indications  
21  
22 related to SSRIs use or other unmeasured confounding factors.  
23  
24  
25  
26  
27  
28  
29

#### 30 **Strengths and limitations of this study**

- 31  
32  
33  
34 ● This is the very first study that investigates the association between paternal  
35 antidepressants use and ASD risk in children.  
36  
37 ● A number of potential confounders, including sociodemographic factors as well as  
38 parental psychiatric history, can be adjusted for based on the availability of  
39 national health registry data.  
40  
41 ● Actual use of SSRIs by fathers during the time period of interest may not be  
42 validated.  
43  
44 ● Those children who received the diagnosis of ASD from private psychiatrists or  
45 remained undiagnosed at the end of the follow-up may not be identified as ASD  
46 case.  
47  
48  
49  
50  
51  
52  
53  
54  
55  
56  
57  
58  
59  
60

## Introduction

Depression is a common mental health problem that affects approximately 350 million people worldwide<sup>1</sup>. Selective serotonin reuptake inhibitors (SSRIs) are commonly prescribed for the treatment of depression and other anxiety-related disorders. However, an increasing body of evidence suggests that prenatal exposure to SSRIs is associated with adverse obstetrical and neonatal outcomes<sup>2-5</sup>. In addition, recent studies have indicated a possible link between prenatal SSRI exposure and neurobehavioral problems in children<sup>2, 6-10</sup>, which may be due to the biological mechanisms (i.e. dysfunctional serotonin signaling)<sup>11</sup>. Whereas several studies have suggested that the previously observed association between prenatal SSRI exposure and neurodevelopmental diseases might be due to confounding by related indications<sup>12-15</sup>.

Autism spectrum disorder (ASD) is one of the major neurodevelopmental disorders characterized by impairments in reciprocal social interaction, communication, and repetitive or stereotypic behavior<sup>16</sup>. The estimated prevalence of ASD has dramatically increased from less than 1 in 2,000 children in the 1960s to approximately 1 in 145 children today<sup>17, 18</sup>. Both genetic and environmental risk factors may contribute to ASD<sup>19</sup>. Recently, maternal use of SSRIs during pregnancy has been reported to be associated with an increased risk of ASD in children<sup>10, 20-24</sup>.

If maternal SSRI exposure during pregnancy plays a role in fetal, even in child's, development, an extended effect of earlier exposure on gamete, particularly human sperm, is biologically plausible. Therefore, the potential role of paternal SSRI use in

1  
2  
3 ASD should also be taken into consideration. Studies in the Nordic countries show  
4  
5 that one-third of the fathers used prescription drugs during the last 6 months prior to  
6  
7 conception<sup>25</sup>, and approximately 1.4% of fathers were dispensed SSRIs during the  
8  
9 last 3 months prior to conception<sup>26, 27</sup>. Although the information regarding the  
10  
11 potential effects of SSRI use by fathers is limited, the hypothesis of an increased risk  
12  
13 of adverse pregnancy or neonatal outcome associated with paternal drug exposure is  
14  
15 not new. Several human studies have indicated the adverse effects of paternal SSRIs  
16  
17 use, including impaired semen quality and abnormal sperm DNA fragmentation,  
18  
19 which has been reported to be associated with diminished fertility, adverse pregnancy  
20  
21 outcomes (like pregnancy loss), and an increased risk of childhood disease<sup>28-30</sup>.  
22  
23  
24  
25  
26  
27

28 Little is known on whether paternal SSRIs use before conception contributes to  
29  
30 the risk of ASD in offspring. We conducted a population-based cohort study to  
31  
32 examine the association between paternal SSRIs use during the last 3 months prior to  
33  
34 conception and risk of ASD in offspring, utilizing data from national Danish health  
35  
36 registries.  
37  
38  
39

## 40 **Methods**

### 41 **Study Population**

42  
43 This study was based on several national registers in Denmark. Each Danish resident  
44  
45 is assigned a unique personal identification number (a 10-digit civil registration  
46  
47 system number used in all registries), which enables accurate linkage of national  
48  
49 registries at the individual level<sup>31</sup>. The Danish Medical Birth Registry (DMBR)  
50  
51 contains records of all deliveries in Denmark since 1973 and includes information  
52  
53  
54  
55  
56  
57  
58  
59  
60

1  
2  
3  
4 about gestational age at birth from 1978<sup>32</sup>. Using the DMBR data, we identified a  
5  
6 cohort of all singletons born alive in Denmark during the period of January 1, 1998  
7  
8 through December 31, 2008 (n=687,580). We excluded children without linkage to  
9  
10 their father (n=16,955) or their mother (n=74), with missing parity (n=208), and with  
11  
12 missing or extreme values of gestational age ( $\leq 23$  weeks or  $\geq 45$  weeks, n=421). A  
13  
14 total of 669,922 children were included in the analysis.  
15  
16

### 17 **Data on SSRIs use**

18  
19 Information on SSRIs use was drawn from the Danish National Prescription Registry  
20  
21 (DNPR)<sup>33</sup>. Since 1995, this registry has recorded all redeemed prescriptions in  
22  
23 Denmark with the following information: the civil registration number of the patient,  
24  
25 the dispensing date, the medication code (the WHO Anatomical Therapeutic Chemical  
26  
27 (ATC) classification system), the number of packages prescribed, and the number of  
28  
29 doses units in package. Selective serotonin reuptake inhibitors use was identified  
30  
31 based on ATC codes: fluoxetine (N06AB03), citalopram (N06AB04), paroxetine  
32  
33 (N06AB05), sertraline (N06AB06), fluvoxamine (N06AB08), and escitalopram  
34  
35 (N06AB10). It is estimated that spermatogenesis takes approximately 74 days<sup>34</sup>,  
36  
37 therefore we chose the last 3 months prior to conception as the exposure window to  
38  
39 cover the susceptible time period. A child was considered exposed if the dispensing  
40  
41 date fell within the specified exposure window or the number of days for which the  
42  
43 SSRIs medication was supplied overlapped any portion of the exposure window.  
44  
45 Children born to fathers who had no prescriptions for SSRIs and no supply overlap  
46  
47 during the entire exposure window were considered unexposed. The date of  
48  
49  
50  
51  
52  
53  
54  
55  
56  
57  
58  
59  
60



1  
2  
3 conception was estimated by subtracting gestational age from the date of delivery.  
4  
5  
6 Data on paternal SSRIs use during the last two years prior to the conception were  
7  
8 extracted for further analyses. We also retrieved the information about maternal SSRIs  
9  
10 use during the pregnancy.  
11  
12

### 13 **Autism spectrum disorders**

14  
15 Autism spectrum disorders in children were identified by using the Danish Psychiatric  
16  
17 Central Research Register (DPCRR) and the Danish National Patient Register  
18  
19 (DNPR). The DPCRR contains diagnostic information on every admission from  
20  
21 psychiatric hospitals and psychiatric wards in general hospitals in Denmark since  
22  
23 1969, and includes data on all outpatient visits and emergency room contacts since  
24  
25 1995<sup>35</sup>. The DNPR has collected data on all inpatients from all somatic hospitals in  
26  
27 Denmark since 1977 and outpatients from 1995<sup>36</sup>. The combined data from the two  
28  
29 registries were used to identify all children diagnosed with ASD. During the study  
30  
31 period, the diagnosis of ASD was based on the International Classification of  
32  
33 Diseases, 10th version (ICD-10) codes of F84.0 (Childhood autism), F84.1 (Atypical  
34  
35 autism), F84.5 (Asperger syndrome), F84.8 (other pervasive developmental  
36  
37 disorders) and F84.9 (unspecified pervasive developmental disorders). The quality of  
38  
39 the childhood autism diagnosis has been validated and the diagnoses could be  
40  
41 verified in 94% of the children with a record in the DPCRR<sup>37</sup>. Children were  
42  
43 followed up from birth till first diagnosis of ASD, death, emigration, or December 31,  
44  
45 2013, whichever came first.  
46  
47  
48  
49  
50  
51  
52  
53

### 54 **Covariates**

Using the Danish nationwide health registers, we retrieved data on characteristics that may be associated with offspring ASD or paternal SSRIs use. For each child, we obtained information on calendar year of birth, gender of the child, birth weight, Apgar score at 5 minutes, gestational age, maternal parity, maternal age at child birth, paternal age at child birth and maternal smoking status during pregnancy from the DMBR. Parents' psychiatric history prior to birth of the index child was obtained from DPCRR by ICD-8 codes 290-315 from 1977 to 1993 and ICD-10 codes F00-F99 from 1994 onward. Furthermore, we identified parents diagnosed with affective disorders before birth of child (specifically, ICD-8 codes 296.09, 296.19, 296.29, 296.39, 296.99, 298.09, 298.19, 300.49, and 301.19, and ICD-10 codes F30-F34 and F38-F39) using the DPCRR.

### Statistical Analysis

Cox proportional-hazards regression models (using child's calendar age in years as the underlying timescale) were used to estimate the hazard ratios (HRs) and 95% confidence intervals (CIs) of ASD in children following exposure to paternal SSRIs use before conception. Observations were censored if the child died or emigrated before the end of follow-up.

We adjusted for variables as following: the calendar year of birth (1998-2000, 2001-2003, 2004-2006, 2007-2008), gender of the child (boy, girl), parity (1, 2,  $\geq 3$ ), parental age at child birth ( $\leq 25$ , 26-30, 31-35, and  $> 35$  years), maternal smoking status during pregnancy (yes or no), maternal history of psychiatric disorders before birth of child (yes or no), maternal antidepressants use during pregnancy (yes or no)

1  
2  
3 in model 1. We additionally adjusted for paternal history of psychiatric disorders  
4 before birth of child (yes or no) in model 2. Models were also run with the exclusion  
5  
6 of those children with missing data for covariates. The proportional hazard  
7  
8 assumption was evaluated for all variables included in the adjusted model by  
9  
10 comparing estimated log-minus-log survival curves.  
11  
12  
13  
14

15  
16 To distinguish the direct effects of SSRIs use from the effects of the indication of  
17  
18 SSRIs use, we extended the exposure window to 1 year before conception. We then  
19  
20 re-categorized the exposed children into three subgroups: children of fathers who used  
21  
22 SSRIs 1) only from the last year till the last 3 months prior to conception (former  
23  
24 users); 2) only during the last 3 months prior to conception (current short-term users,  
25  
26 hereinafter referred to as ‘current users’); 3) both before and during the last 3 months  
27  
28 prior to conception (both former and current users). The reference group consisted of  
29  
30 those children born to fathers who never used SSRIs medication through the last year  
31  
32 before conception.  
33  
34  
35  
36

37  
38 The stratified analysis was performed to examine whether the association between  
39  
40 paternal SSRIs use and ASD in children differed by gender. We also restricted the  
41  
42 analyses to children whose mothers neither received antidepressant medication during  
43  
44 pregnancy nor had affective disorder before birth of child. To further distinguish the  
45  
46 effect of SSRIs medication from that of the main indication (i.e., affective disorders)  
47  
48 for SSRIs treatment, we performed stratified analyses according to paternal history of  
49  
50 affective disorder before birth of the index child. As for those children born to fathers  
51  
52 with affective disorders, the ASD risk we examined could be solely attributable to  
53  
54  
55  
56  
57  
58  
59  
60

1  
2  
3 paternal SSRIs use since both of the exposed children and the reference children were  
4  
5  
6 with paternal affective disorders.  
7

8 To control for unmeasured family-related confounding factors (such as genetic  
9  
10 liability for neuropsychiatric conditions and early postnatal environmental influences),  
11  
12 we conducted sibling-matched analyses by only including the families with  
13  
14 exposure-discordant siblings, in which there was at least one child with paternal  
15  
16 SSRIs preconception exposure and one child without exposure. Using the stratified  
17  
18 Cox proportional-hazards regression with a separate stratum for each family, we  
19  
20  
21 estimated the association between paternal SSRIs use before conception and ASD in  
22  
23 matched sets of exposure-discordant siblings. In the stratified Cox regression model,  
24  
25  
26 we also adjusted for those covariates that varied among siblings with the same father  
27  
28 (including parental age at conception, maternal parity, smoking, and maternal AD use  
29  
30 during pregnancy).  
31  
32  
33  
34

35 All analyses were performed using SAS version 9.1 (SAS Institute Inc, Cary,  
36  
37 North Carolina, USA).  
38  
39

## 40 **Results**

41  
42 Among the 669,922 singletons included in the study, 6,870 (1.03%) children were  
43  
44 born to fathers who had redeemed a prescription for SSRIs during the last 3 months  
45  
46 prior to conception. During the study period, a total of 7,577 children were diagnosed  
47  
48 with ASD. The median age at diagnosis of ASD was 6.77 years (interquartile range:  
49  
50 4.84 to 9.48 years). Characteristics of the study population are shown in Table 1.  
51  
52  
53 Compared with the unexposed group, there were a higher proportion of exposed  
54  
55  
56  
57  
58  
59  
60

1  
2  
3 children born in later calendar years. Fathers in exposed group were more likely to be  
4  
5 older at child birth and to have a history of psychiatric disorder (including affective  
6  
7 disorder) before birth of child. Mothers of exposed children were characterized as  
8  
9 having higher parity, being more likely to be older at child birth, to use  
10  
11 antidepressants during pregnancy, and to have a history of psychiatric disorder before  
12  
13 birth of child.  
14  
15  
16  
17

18 Among 61,555 person-years of follow-up, we identified 104 cases of ASD in  
19  
20 children born to fathers who used SSRIs during the last 3 months prior to conception  
21  
22 (incidence rate: 169 per 100,000 person-years). This incidence rate corresponded to a  
23  
24 62% increased risk of ASD compared with the unexposed group (Table 2). The  
25  
26 adjusted HR (aHR) of ASD was 1.54 (95% CI: 1.27-1.88) after adjusting for potential  
27  
28 confounders in model 1. After paternal psychiatric history was further adjusted for in  
29  
30 model 2, the estimate was 1.43 (95%CI: 1.18-1.74). When extending the exposure  
31  
32 window to the last one year prior to conception, after the full adjustment, the HR for  
33  
34 ASD in children of fathers who were former users only and who were both former  
35  
36 and current users was 1.54 (95%CI: 1.21-1.94) and 1.32 (95%CI: 1.02-1.72),  
37  
38 respectively. However, the increased risk decreased and became nonsignificant among  
39  
40 children of fathers who were only current users (aHR=1.17, 95%CI: 0.75-1.82, model  
41  
42 2, table2).  
43  
44  
45  
46  
47  
48  
49

50 The risk estimates of ASD were similar for both boys and girls, regardless of the  
51  
52 exposure (Table S1). When we restricted analyses to children whose mothers neither  
53  
54  
55  
56  
57  
58  
59  
60

1  
2  
3 used SSRIs during pregnancy nor had affective disorder before birth of child, the  
4  
5  
6 results did not change essentially (Table S2).  
7

8  
9 When the analyses were stratified by paternal affective disorder before birth of the  
10  
11 index child, in children born to fathers with a history of affective disorder, there was  
12  
13 no association between paternal SSRIs use before conception and ASD in the  
14  
15 offspring (model 2: aHR=1.10, 95%CI: 0.61-1.98). For children whose father without  
16  
17 affective disorder, the patterns of associations remained similar to those of the main  
18  
19 analyses (Table 3).  
20  
21

22  
23 In the sibling analysis, we identified 5,479 families with more than one child and  
24  
25 with at least one child with paternal SSRIs use before conception (Table 4). The risk  
26  
27 of ASD in exposed children was decreased when compared with their unexposed  
28  
29 siblings (aHR=0.74, 95%CI:0.34-1.59), although with wider confidence interval.  
30  
31

### 32 33 **Discussion**

34  
35 In this large population-based cohort study, we observed an increased risk of ASD in  
36  
37 the offspring following paternal use of SSRIs during the last 3 months prior to  
38  
39 conception. However, the risk attenuated after adjusting for a number of potential  
40  
41 confounders, especially fathers' psychiatric conditions. When extending the exposure  
42  
43 window to one year before conception, the ASD risk persisted among children born to  
44  
45 former users but not current users. In addition, among children born to father with  
46  
47 affective disorder, no association was observed. Finally, we performed a sibling  
48  
49 analysis which allowed for better control of unmeasured familial confounding and the  
50  
51 decreased ASD risk was found among exposed children rather than their unexposed  
52  
53  
54  
55  
56  
57  
58  
59  
60

1  
2  
3 siblings. Taken as a whole, our results did not support that paternal SSRIs use before  
4  
5  
6 conception could increase the risk of ASD in children.  
7

8  
9  
10 Recently, concerns have been raised regarding the risk of ASD in the offspring  
11 associated with prenatal exposure to SSRIs. Four previous human studies have  
12 suggested that in utero exposure to antidepressants would increase the risk of ASD in  
13 children<sup>21-24</sup>, although another two studies using the Danish registers have reported no  
14 significant association<sup>38,39</sup>. Basic neuro-biologic studies have showed that prenatal  
15 SSRIs administration may be part of a causal pathway to ASD by operating directly  
16 on the developing brain<sup>40,41</sup>. Considering the detrimental effect of SSRIs on sperm<sup>28,</sup>  
17  
18  
19  
20  
21  
22  
23  
24  
25  
26  
27  
28  
29  
30  
31  
32  
33  
34  
35  
36  
37  
38  
39  
40  
41  
42  
43  
44  
45  
46  
47  
48  
49  
50  
51  
52  
53  
54  
55  
56  
57  
58  
59  
60  
61  
62  
63  
64  
65  
66  
67  
68  
69  
70  
71  
72  
73  
74  
75  
76  
77  
78  
79  
80  
81  
82  
83  
84  
85  
86  
87  
88  
89  
90  
91  
92  
93  
94  
95  
96  
97  
98  
99  
100  
101  
102  
103  
104  
105  
106  
107  
108  
109  
110  
111  
112  
113  
114  
115  
116  
117  
118  
119  
120  
121  
122  
123  
124  
125  
126  
127  
128  
129  
130  
131  
132  
133  
134  
135  
136  
137  
138  
139  
140  
141  
142  
143  
144  
145  
146  
147  
148  
149  
150  
151  
152  
153  
154  
155  
156  
157  
158  
159  
160  
161  
162  
163  
164  
165  
166  
167  
168  
169  
170  
171  
172  
173  
174  
175  
176  
177  
178  
179  
180  
181  
182  
183  
184  
185  
186  
187  
188  
189  
190  
191  
192  
193  
194  
195  
196  
197  
198  
199  
200  
201  
202  
203  
204  
205  
206  
207  
208  
209  
210  
211  
212  
213  
214  
215  
216  
217  
218  
219  
220  
221  
222  
223  
224  
225  
226  
227  
228  
229  
230  
231  
232  
233  
234  
235  
236  
237  
238  
239  
240  
241  
242  
243  
244  
245  
246  
247  
248  
249  
250  
251  
252  
253  
254  
255  
256  
257  
258  
259  
260  
261  
262  
263  
264  
265  
266  
267  
268  
269  
270  
271  
272  
273  
274  
275  
276  
277  
278  
279  
280  
281  
282  
283  
284  
285  
286  
287  
288  
289  
290  
291  
292  
293  
294  
295  
296  
297  
298  
299  
300  
301  
302  
303  
304  
305  
306  
307  
308  
309  
310  
311  
312  
313  
314  
315  
316  
317  
318  
319  
320  
321  
322  
323  
324  
325  
326  
327  
328  
329  
330  
331  
332  
333  
334  
335  
336  
337  
338  
339  
340  
341  
342  
343  
344  
345  
346  
347  
348  
349  
350  
351  
352  
353  
354  
355  
356  
357  
358  
359  
360  
361  
362  
363  
364  
365  
366  
367  
368  
369  
370  
371  
372  
373  
374  
375  
376  
377  
378  
379  
380  
381  
382  
383  
384  
385  
386  
387  
388  
389  
390  
391  
392  
393  
394  
395  
396  
397  
398  
399  
400  
401  
402  
403  
404  
405  
406  
407  
408  
409  
410  
411  
412  
413  
414  
415  
416  
417  
418  
419  
420  
421  
422  
423  
424  
425  
426  
427  
428  
429  
430  
431  
432  
433  
434  
435  
436  
437  
438  
439  
440  
441  
442  
443  
444  
445  
446  
447  
448  
449  
450  
451  
452  
453  
454  
455  
456  
457  
458  
459  
460  
461  
462  
463  
464  
465  
466  
467  
468  
469  
470  
471  
472  
473  
474  
475  
476  
477  
478  
479  
480  
481  
482  
483  
484  
485  
486  
487  
488  
489  
490  
491  
492  
493  
494  
495  
496  
497  
498  
499  
500  
501  
502  
503  
504  
505  
506  
507  
508  
509  
510  
511  
512  
513  
514  
515  
516  
517  
518  
519  
520  
521  
522  
523  
524  
525  
526  
527  
528  
529  
530  
531  
532  
533  
534  
535  
536  
537  
538  
539  
540  
541  
542  
543  
544  
545  
546  
547  
548  
549  
550  
551  
552  
553  
554  
555  
556  
557  
558  
559  
560  
561  
562  
563  
564  
565  
566  
567  
568  
569  
570  
571  
572  
573  
574  
575  
576  
577  
578  
579  
580  
581  
582  
583  
584  
585  
586  
587  
588  
589  
590  
591  
592  
593  
594  
595  
596  
597  
598  
599  
600  
601  
602  
603  
604  
605  
606  
607  
608  
609  
610  
611  
612  
613  
614  
615  
616  
617  
618  
619  
620  
621  
622  
623  
624  
625  
626  
627  
628  
629  
630  
631  
632  
633  
634  
635  
636  
637  
638  
639  
640  
641  
642  
643  
644  
645  
646  
647  
648  
649  
650  
651  
652  
653  
654  
655  
656  
657  
658  
659  
660  
661  
662  
663  
664  
665  
666  
667  
668  
669  
670  
671  
672  
673  
674  
675  
676  
677  
678  
679  
680  
681  
682  
683  
684  
685  
686  
687  
688  
689  
690  
691  
692  
693  
694  
695  
696  
697  
698  
699  
700  
701  
702  
703  
704  
705  
706  
707  
708  
709  
710  
711  
712  
713  
714  
715  
716  
717  
718  
719  
720  
721  
722  
723  
724  
725  
726  
727  
728  
729  
730  
731  
732  
733  
734  
735  
736  
737  
738  
739  
740  
741  
742  
743  
744  
745  
746  
747  
748  
749  
750  
751  
752  
753  
754  
755  
756  
757  
758  
759  
760  
761  
762  
763  
764  
765  
766  
767  
768  
769  
770  
771  
772  
773  
774  
775  
776  
777  
778  
779  
780  
781  
782  
783  
784  
785  
786  
787  
788  
789  
790  
791  
792  
793  
794  
795  
796  
797  
798  
799  
800  
801  
802  
803  
804  
805  
806  
807  
808  
809  
810  
811  
812  
813  
814  
815  
816  
817  
818  
819  
820  
821  
822  
823  
824  
825  
826  
827  
828  
829  
830  
831  
832  
833  
834  
835  
836  
837  
838  
839  
840  
841  
842  
843  
844  
845  
846  
847  
848  
849  
850  
851  
852  
853  
854  
855  
856  
857  
858  
859  
860  
861  
862  
863  
864  
865  
866  
867  
868  
869  
870  
871  
872  
873  
874  
875  
876  
877  
878  
879  
880  
881  
882  
883  
884  
885  
886  
887  
888  
889  
890  
891  
892  
893  
894  
895  
896  
897  
898  
899  
900  
901  
902  
903  
904  
905  
906  
907  
908  
909  
910  
911  
912  
913  
914  
915  
916  
917  
918  
919  
920  
921  
922  
923  
924  
925  
926  
927  
928  
929  
930  
931  
932  
933  
934  
935  
936  
937  
938  
939  
940  
941  
942  
943  
944  
945  
946  
947  
948  
949  
950  
951  
952  
953  
954  
955  
956  
957  
958  
959  
960  
961  
962  
963  
964  
965  
966  
967  
968  
969  
970  
971  
972  
973  
974  
975  
976  
977  
978  
979  
980  
981  
982  
983  
984  
985  
986  
987  
988  
989  
990  
991  
992  
993  
994  
995  
996  
997  
998  
999  
1000

Recently, concerns have been raised regarding the risk of ASD in the offspring associated with prenatal exposure to SSRIs. Four previous human studies have suggested that in utero exposure to antidepressants would increase the risk of ASD in children<sup>21-24</sup>, although another two studies using the Danish registers have reported no significant association<sup>38,39</sup>. Basic neuro-biologic studies have showed that prenatal SSRIs administration may be part of a causal pathway to ASD by operating directly on the developing brain<sup>40,41</sup>. Considering the detrimental effect of SSRIs on sperm<sup>28, 29, 42</sup>, paternal SSRIs use before conception may also cause adverse effects on pregnancy outcomes. However, till now, only one study have suggested that SSRIs administration to male rats could induce deterioration in fertility and fetal outcomes (including weight gain, organ weights and feed consumption)<sup>43</sup>. To our knowledge, our study is the first to investigate the link between paternal antidepressants use before conception and ASD risk in children. Considering the limited number of ASD cases and the challenges posed by confounding, further studies are needed to corroborate the findings.

In the present study, the increased risk of ASD observed in former users but not in current users implied that indications for paternal SSRIs use may account for the observed association between paternal SSRIs use and ASD in children, which was supported by previous studies suggesting that parental depression and other psychiatric disorders might be associated with the risk of autism in children<sup>44-46</sup>.

1  
2  
3  
4 Therefore, similar to those studies which focused on the effect of maternal  
5  
6 antidepressants use during pregnancy, confounding by indication poses the main  
7  
8 challenge in our study. We adopted several analytic strategies to account for such  
9  
10 confounding by indication: (1) regression adjustment for paternal psychiatric  
11  
12 disorders; (2) negative controls (i.e., former-users analyses); (3) stratified analyses  
13  
14 according to paternal history of affective disorders; and (4) sibling analyses. The  
15  
16 results of these analyses suggested that paternal psychiatric illness rather than SSRIs  
17  
18 exposure might be associated with ASD liability. It was worth noting that, in children  
19  
20 born to fathers without affective disorders, there was a significantly increased risk  
21  
22 associated with paternal SSRIs use. Most fathers might receive SSRIs treatment from  
23  
24 their general practitioner and were therefore not registered with a diagnosis of  
25  
26 affective disorders in the hospital system. Therefore, it was possible that the increased  
27  
28 risk associated with prenatal SSRIs use was partly confounded by paternal affective  
29  
30 disorders diagnosed outside a hospital department for which we were not able to  
31  
32 adjust. In addition, other psychiatric diseases related to SSRIs use might also  
33  
34 contribute to the observed association.  
35  
36  
37  
38  
39  
40  
41  
42

43 Our study has several methodological strengths. One strength was that the linkage  
44  
45 of several nationwide health registries in Denmark enabled us to conduct a large  
46  
47 cohort study with virtually complete follow-up. The definition on exposure to SSRIs  
48  
49 was based on a national registry, which eliminated the risk of recall bias caused by  
50  
51 self-report. Another strength was that the information on ASD diagnosis was obtained  
52  
53 independently of exposure measurement, which could also mitigate the information  
54  
55  
56  
57  
58  
59  
60



1  
2  
3 bias. Furthermore, the availability of health registry data enabled us to adjust for a  
4  
5 number of potential confounders including sociodemographic factors as well as  
6  
7 parental psychiatric history. Besides, we have taken the potential effect of maternal  
8  
9 antidepressants use during pregnancy as well as maternal mental disease into  
10  
11 consideration. To remove the confounding factors attributing to mothers, we adjusted  
12  
13 the maternal SSRIs use in regression model, and also restricted the analyses to  
14  
15 children whose mothers neither received antidepressant medication during pregnancy  
16  
17 nor had affective disorders before child birth.  
18  
19  
20  
21  
22

23 Limitations need to be considered when interpreting the results of our study. Firstly,  
24  
25 we were unable to validate actual use of SSRIs by fathers during the time period of  
26  
27 interest because we relied on medical records of dispensed prescriptions. This may  
28  
29 lead to misclassification of exposure status because some people may not take the  
30  
31 medication or may take it later. Nevertheless, the misclassification was most likely  
32  
33 non-differential, which could bias the association toward null. Besides, some patients  
34  
35 may receive SSRIs treatment during inpatient admissions which are not included in  
36  
37 the prescription registry. We expect this problem to be minor since those inpatients  
38  
39 usually have severe psychiatric disorders and are more likely to continue treatment  
40  
41 after discharge. Secondly, the 3-month cut-off point was set based on the fact that  
42  
43 spermatogenesis takes approximately 70-90 days in humans. Whereas it may be  
44  
45 possible that SSRIs drugs induce sperm damage at the very primitive stage. However,  
46  
47 the results did not change markedly after extending the putative exposure period to  
48  
49 the last 6 months prior to conception (data not shown). Thirdly, ASD in children was  
50  
51  
52  
53  
54  
55  
56  
57  
58  
59  
60

1  
2  
3 ascertained through the DNPR and the DPCRR, which did not include those children  
4  
5  
6 who received the diagnosis of ASD from private psychiatrists or remained  
7  
8 undiagnosed at the end of the follow-up. However, the prevalence of ASD in our  
9  
10 cohort was 1.13%, which was similar to that reported in the United States during the  
11  
12 study period (1.14%)<sup>47</sup>. Hence the bias introduced by case identification was  
13  
14 expected to be minimal. Fourthly, the age of ASD diagnosis which was used as time  
15  
16 event in Cox regression models might be affected by external and extraneous factors.  
17  
18 If these factors are differentially distributed in exposed and unexposed group, the  
19  
20 actual associations may be biased. We have adjusted for some factors which may  
21  
22 influence age of diagnosis to reduce the bias to some extent. However, we could not  
23  
24 rule out the confounding effects of unmeasured factors, which is a limitation of the  
25  
26 study.  
27  
28  
29  
30  
31

### 32 **Conclusions**

33  
34  
35 In the study, paternal SSRI use before conception was associated with an increased  
36  
37 risk of ASD in the offspring, especially in the former users who took SSRIs over the  
38  
39 longer term. However, null association were observed in exposed children with  
40  
41 paternal affective disorders, and similar ASD risk were observed among exposed and  
42  
43 unexposed siblings, which implicates that paternal underlying indications related to  
44  
45 SSRIs use or other unmeasured confounding factors may explain the increased risk.  
46  
47  
48

### 49 **Footnotes**

50  
51 This cohort study was approved by the Danish Data Protection Agency (Document No.  
52  
53 2013-41-2569).  
54  
55  
56  
57  
58  
59  
60

1  
2  
3 **Contributors:** HL had full access to all the data in the study and took responsibility  
4  
5 for the integrity of the data and the accuracy of the data analysis. HL, WY and JL  
6  
7 conceptualized and designed the study, and MHM and VE helped with its  
8  
9 development. FY, LL and JPC conducted the statistical analysis. HL, JPC and FY  
10  
11 interpreted the results and FY drafted the initial manuscript. All authors reviewed the  
12  
13 manuscript and approved the final version as submitted.  
14  
15

16  
17 **Funding:** The study was supported by the National Natural Science Foundation of  
18  
19 China (81428011), the National Key Research and Development Program of China  
20  
21 (2016YFC1000505), the European Research Council  
22  
23 (ERC-2010-StG-260242-PROGEURO), Nordic Cancer Union (176673,186200),  
24  
25 Danish Council for Independent Research (DFF-6110-00019), Karen Elise Jensens  
26  
27 Fond (2016), and the Program for Clinical Research Infrastructure (PROCRIN)  
28  
29 established by the Lundbeck Foundation and the Novo Nordisk Foundation.  
30  
31

32  
33 **Competing interests:** The authors declare that they have no conflict of interest.  
34  
35

36  
37 **Statement of the independence of researchers from funders:** The funding sources  
38  
39 had no role in the design and conduct of the study; collection, management, analysis,  
40  
41 and interpretation of the data; and preparation, review, or approval of the manuscript;  
42  
43 and decision to submit the manuscript for publication. The researchers were  
44  
45 independent from the funders.  
46  
47

48  
49 **Ethical approval:** The study was based on secondary data. No individuals were  
50  
51 approached as a result of the study, nor did we access any other data from the  
52  
53 participants. This study was approved by the Danish Data Protection Agency  
54  
55

(Document No. 2013-41-2569). All procedures performed in the study involving human participants were in accordance with the ethical standards of the institutional and/or national research committee and with the 1964 Helsinki declaration and its later amendments or comparable ethical standards. Approval by an institutional review board and informed consent are not required for registry-based research in Denmark.

**Data sharing statement:** No additional data are available.

## Reference

1. Organization WH. Depression [fact sheet no. 369]. 2012. As of September. 2015;30.
2. Alwan S, Friedman JM, Chambers C. Safety of selective serotonin reuptake inhibitors in pregnancy: a review of current evidence. *CNS drugs*. 2016;30(6):499-515.
3. Wen SW, Yang Q, Garner P, et al. Selective serotonin reuptake inhibitors and adverse pregnancy outcomes. *American journal of obstetrics and gynecology*. 2006;194(4):961-966.
4. Lund N, Pedersen LH, Henriksen TB. Selective serotonin reuptake inhibitor exposure in utero and pregnancy outcomes. *Archives of pediatrics & adolescent medicine*. 2009;163(10):949-954.
5. Pedersen LH, Henriksen TB, Vestergaard M, et al. Selective serotonin reuptake inhibitors in pregnancy and congenital malformations: population based cohort study. *Bmj*. 2009;339:b3569.
6. Oberlander TF, Reebye P, Misri S, et al. Externalizing and attentional behaviors in children of depressed mothers treated with a selective serotonin reuptake inhibitor antidepressant during pregnancy. *Archives of pediatrics & adolescent medicine*. 2007;161(1):22-29.
7. Nulman I, Koren G, Rovet J, et al. Neurodevelopment of children following prenatal exposure to venlafaxine, selective serotonin reuptake inhibitors, or untreated maternal depression. *American Journal of Psychiatry*. 2012;169(11):1165-1174.
8. Healy D, Le Noury J, Mangin D. Links between serotonin reuptake inhibition during pregnancy and neurodevelopmental delay/spectrum disorders: A systematic review of epidemiological and physiological evidence. *International Journal of Risk & Safety in Medicine*. 2016;28(3):125-141.
9. Clements CC, Castro VM, Blumenthal SR, et al. Prenatal antidepressant exposure is associated with risk for attention-deficit hyperactivity disorder but not autism spectrum disorder in a large health system. *Molecular psychiatry*. 2015;20(6):727-734.
10. Boukhris T, Sheehy O, Mottron L, et al. Antidepressant use during pregnancy and the risk of autism spectrum disorder in children. *JAMA pediatrics*. 2016;170(2):117-124.
11. Hadjikhani N. Serotonin, pregnancy and increased autism prevalence: is there a link? *Medical Hypotheses*. 2010;74(5):880-883.
12. Brown HK, Ray JG, Wilton AS, et al. Association Between Serotonergic Antidepressant Use During Pregnancy and Autism Spectrum Disorder in Children. *Jama*. 2017;317(15):1544-1552.
13. Sujan AC, Rickert ME, Öberg AS, et al. Associations of Maternal Antidepressant Use During the

- 1  
2  
3 First Trimester of Pregnancy With Preterm Birth, Small for Gestational Age, Autism Spectrum Disorder,  
4 and Attention-Deficit/Hyperactivity Disorder in Offspring. *Jama*. 2017;317(15):1553-1562.
- 5 14. Oberlander TF, Zwaigenbaum L. Disentangling Maternal Depression and Antidepressant Use  
6 During Pregnancy as Risks for Autism in Children. *Jama*. 2017;317(15):1533-1534.
- 7 15. Mezzacappa A, Lasica P-A, Gianfagna F, et al. Risk for Autism Spectrum Disorders According to  
8 Period of Prenatal Antidepressant Exposure: A Systematic Review and Meta-analysis. *JAMA pediatrics*.  
9 2017.
- 10 16. Baird G, Simonoff E, Pickles A, et al. Prevalence of disorders of the autism spectrum in a  
11 population cohort of children in South Thames: the Special Needs and Autism Project (SNAP). *The*  
12 *lancet*. 2006;368(9531):210-215.
- 13 17. Rutter M. Incidence of autism spectrum disorders: Changes over time and their meaning\*. *Acta*  
14 *paediatrica*. 2005;94(1):2-15.
- 15 18. Hill AP, Zuckerman K, Fombonne E. Epidemiology of autism spectrum disorders. *Translational*  
16 *Approaches to Autism Spectrum Disorder: Springer* 2015:13-38.
- 17 19. Newschaffer CJ, Croen LA, Daniels J, et al. The epidemiology of autism spectrum disorders\*.  
18 *Annu Rev Public Health*. 2007;28:235-258.
- 19 20. Brown HK, Hussain-Shamsy N, Lunskey Y, et al. The association between antenatal exposure to  
20 selective serotonin reuptake inhibitors and autism: a systematic review and meta-analysis. *The Journal*  
21 *of clinical psychiatry*. 2017;78(1):e48.
- 22 21. Gidaya NB, Lee BK, Burstyn I, et al. In utero exposure to selective serotonin reuptake inhibitors  
23 and risk for autism spectrum disorder. *Journal of autism and developmental disorders*.  
24 2014;44(10):2558-2567.
- 25 22. Croen LA, Grether JK, Yoshida CK, et al. Antidepressant use during pregnancy and childhood  
26 autism spectrum disorders. *Archives of general psychiatry*. 2011;68(11):1104-1112.
- 27 23. Rai D, Lee BK, Dalman C, et al. Parental depression, maternal antidepressant use during  
28 pregnancy, and risk of autism spectrum disorders: population based case-control study. 2013.
- 29 24. Rai D, Lee BK, Dalman C, et al. Antidepressants during pregnancy and autism in offspring:  
30 population based cohort study. *Bmj*. 2017;358:j2811.
- 31 25. Schirm E, Pedersen L, Tobi H, et al. Drug use among fathers around time of conception: two  
32 register based surveys from Denmark and The Netherlands. *Pharmacoepidemiology and drug safety*.  
33 2004;13(9):609-613.
- 34 26. Engeland A, Bramness JG, Daltveit AK, et al. Prescription drug use among fathers and mothers  
35 before and during pregnancy. A population - based cohort study of 106 000 pregnancies in Norway  
36 2004 - 2006. *British journal of clinical pharmacology*. 2008;65(5):653-660.
- 37 27. Crijns I, Bos J, Knol M, et al. Paternal drug use: before and during pregnancy. *Expert opinion on*  
38 *drug safety*. 2012;11(4):513-518.
- 39 28. Tanrikut C, Feldman AS, Altemus M, et al. Adverse effect of paroxetine on sperm. *Fertility and*  
40 *sterility*. 2010;94(3):1021-1026.
- 41 29. Safarinejad MR. Sperm DNA damage and semen quality impairment after treatment with  
42 selective serotonin reuptake inhibitors detected using semen analysis and sperm chromatin structure  
43 assay. *The Journal of urology*. 2008;180(5):2124-2128.
- 44 30. Lewis S, Aitken R. DNA damage to spermatozoa has impacts on fertilization and pregnancy. *Cell*  
45 *and tissue research*. 2005;322(1):33-41.
- 46 31. Pedersen CB, Gøtzsche H, Møller JØ, et al. The Danish civil registration system. *Dan Med Bull*.

- 2006;53(4):441-449.
32. Knudsen LB, Olsen J. The Danish Medical Birth Registry. *Danish medical bulletin*. 1998;45(3):320-323.
33. Kildemoes HW, Sørensen HT, Hallas J. The Danish national prescription registry. *Scandinavian journal of public health*. 2011;39(7 suppl):38-41.
34. Cordier S. Evidence for a role of paternal exposures in developmental toxicity. *Basic & clinical pharmacology & toxicology*. 2008;102(2):176-181.
35. Mors O, Perto GP, Mortensen PB. The Danish psychiatric central research register. *Scandinavian journal of public health*. 2011;39(7 suppl):54-57.
36. Andersen TF, Madsen M, Jørgensen J, et al. The Danish National Hospital Register. A valuable source of data for modern health sciences. *Danish medical bulletin*. 1999;46(3):263-268.
37. Lauritsen MB, Jørgensen M, Madsen KM, et al. Validity of childhood autism in the Danish Psychiatric Central Register: findings from a cohort sample born 1990–1999. *Journal of autism and developmental disorders*. 2010;40(2):139-148.
38. Christensen J, Parner ET, Vestergaard M. Antidepressant exposure in pregnancy and risk of autism spectrum disorders. *Clinical epidemiology*. 2013;5:449-459.
39. Hviid A, Melbye M, Pasternak B. Use of selective serotonin reuptake inhibitors during pregnancy and risk of autism. *New England Journal of Medicine*. 2013;369(25):2406-2415.
40. Maciag D, Simpson KL, Coppinger D, et al. Neonatal antidepressant exposure has lasting effects on behavior and serotonin circuitry. *Neuropsychopharmacology*. 2006;31(1):47-57.
41. Bonnin A, Levitt P. Fetal, maternal and placental sources of serotonin and new implications for developmental programming of the brain. *Neuroscience*. 2011;197:1.
42. Tanrikut C, Schlegel PN. Antidepressant-associated changes in semen parameters. *Urology*. 2007;69(1):185. e185-185. e187.
43. Elmazoudy R, Abdelhameed N, Elmasry A. Paternal dapoxetine administration induced deterioration in reproductive performance, fetal outcome, sexual behavior and biochemistry of male rats. *International Journal of Impotence Research*. 2015;27(6).
44. Daniels JL, Forssen U, Hultman CM, et al. Parental psychiatric disorders associated with autism spectrum disorders in the offspring. *Pediatrics*. 2008;121(5):e1357-e1362.
45. Larsson HJ, Eaton WW, Madsen KM, et al. Risk factors for autism: perinatal factors, parental psychiatric history, and socioeconomic status. *American journal of epidemiology*. 2005;161(10):916-925.
46. Jokiranta E, Brown AS, Heinimaa M, et al. Parental psychiatric disorders and autism spectrum disorders. *Psychiatry research*. 2013;207(3):203-211.
47. Kogan MD, Blumberg SJ, Schieve LA, et al. Prevalence of parent-reported diagnosis of autism spectrum disorder among children in the US, 2007. *Pediatrics*. 2009;124(5):1395-1403.

**Table 1. Baseline Characteristics of the study population**

| <b>Characteristic</b>                               | <b>Paternal SSRIs use during the last 3 months prior to conception<br/>(N=6,870)</b> | <b>No paternal SSRIs use during the last 3 months prior to conception<br/>(N=663, 052)</b> |
|-----------------------------------------------------|--------------------------------------------------------------------------------------|--------------------------------------------------------------------------------------------|
| <b>Calendar Year of birth, No. (%)</b>              |                                                                                      |                                                                                            |
| 1998-2000                                           | 1,021(14.9)                                                                          | 185,784(28.0)                                                                              |
| 2001-2003                                           | 1,526(22.2)                                                                          | 179,952(27.1)                                                                              |
| 2004-2006                                           | 2,305(33.5)                                                                          | 178,664(27.0)                                                                              |
| 2007-2008                                           | 2,018(29.4)                                                                          | 118,652(17.9)                                                                              |
| <b>Gender, No. (%)</b>                              |                                                                                      |                                                                                            |
| Boy                                                 | 3,549(51.7)                                                                          | 340,194(51.3)                                                                              |
| Girl                                                | 3,321(48.3)                                                                          | 322,858(48.7)                                                                              |
| <b>Birth Weight (g), No. (%)</b>                    |                                                                                      |                                                                                            |
| <2500                                               | 278(4.1)                                                                             | 22,315(3.4)                                                                                |
| 2500-3250                                           | 1,729(25.2)                                                                          | 154,494(23.3)                                                                              |
| 3250-4000                                           | 3,582(52.1)                                                                          | 348,853(52.6)                                                                              |
| 4000-8000                                           | 1,243(18.1)                                                                          | 132,343(19.9)                                                                              |
| Unknown                                             | 38(0.5)                                                                              | 5,047(0.8)                                                                                 |
| <b>Parity, No. (%)</b>                              |                                                                                      |                                                                                            |
| 1                                                   | 2,693(39.2)                                                                          | 282,895(42.7)                                                                              |
| 2                                                   | 2,433(35.4)                                                                          | 250,496(37.8)                                                                              |
| ≥3                                                  | 1,744(25.4)                                                                          | 129,661(19.5)                                                                              |
| <b>Preterm Birth, No. (%)</b><br>(<37 weeks)        |                                                                                      |                                                                                            |
| No                                                  | 6,489(94.4)                                                                          | 630,851(95.1)                                                                              |
| Yes                                                 | 381(5.6)                                                                             | 32,201(4.9)                                                                                |
| <b>Apgar score at 5 minutes, No. (%)</b>            |                                                                                      |                                                                                            |
| 0-7                                                 | 91(1.3)                                                                              | 8,224(1.2)                                                                                 |
| 8-9                                                 | 442(6.4)                                                                             | 39,941(6.0)                                                                                |
| 10                                                  | 6,269(91.3)                                                                          | 607,634(91.7)                                                                              |
| Unknown                                             | 68(1.0)                                                                              | 7,253(1.1)                                                                                 |
| <b>Maternal age at child birth (years), No. (%)</b> |                                                                                      |                                                                                            |
| ≤25                                                 | 958(13.9)                                                                            | 99,273(15.0)                                                                               |
| 26-30                                               | 2,238(32.6)                                                                          | 244,419(36.9)                                                                              |
| 31-35                                               | 2,386(34.7)                                                                          | 225,610(34.0)                                                                              |
| >35                                                 | 1,288(18.8)                                                                          | 93,750(14.1)                                                                               |
| <b>Paternal age at child birth (years), No. (%)</b> |                                                                                      |                                                                                            |
| ≤25                                                 | 364(5.3)                                                                             | 47,490(7.2)                                                                                |
| 26-30                                               | 1,434(20.9)                                                                          | 180,612(27.2)                                                                              |
| 31-35                                               | 2,395(34.8)                                                                          | 242,702(36.6)                                                                              |
| >35                                                 | 2,677(39.0)                                                                          | 192,248(29.0)                                                                              |

**Table 1. Baseline Characteristics of the study population (continued)**

| <b>Maternal smoking status<sup>a</sup>, No. (%)</b>      |              |               |
|----------------------------------------------------------|--------------|---------------|
| No                                                       | 4,326(63.0)  | 477,574(72.0) |
| Yes                                                      | 1,334(19.4)  | 106,233(16.0) |
| Unknown                                                  | 1,210(17.6)  | 79,245(12.0)  |
| <b>Maternal AD use during pregnancy, No. (%)</b>         |              |               |
| No                                                       | 6,548(94.0)  | 653,496(98.6) |
| Yes                                                      | 412(6.0)     | 9,556(1.4)    |
| <b>Maternal history of Affective disorder, No. (%)</b>   |              |               |
| No                                                       | 6,607(96.2)  | 654,234(98.7) |
| Yes                                                      | 263(3.8)     | 8,818(1.3)    |
| <b>Paternal history of Affective disorder, No. (%)</b>   |              |               |
| No                                                       | 6,099 (88.8) | 659,639(99.5) |
| Yes                                                      | 771(11.2)    | 3,413(0.5)    |
| <b>Maternal history of psychiatric disorder, No. (%)</b> |              |               |
| No                                                       | 6,175(89.9)  | 626,840(94.5) |
| Yes                                                      | 695(10.1)    | 36,212(5.5)   |
| <b>Paternal history of psychiatric disorder, No. (%)</b> |              |               |
| No                                                       | 5,092 (74.1) | 630,990(95.2) |
| Yes                                                      | 1,178(25.9)  | 32,062(4.8)   |

**Abbreviations:** SSRI, selective serotonin reuptake inhibitor; N, number; AD, antidepressant drugs;

<sup>a</sup> Maternal smoking information was missing among those children born from 2007 to 2008.



**Table 2. Association between paternal SSRIs use before conception and ASD in offspring**

| Paternal SSRIs use before conception                                   | Offspring with ASD no. | Follow-up no. of person-yr | Hazard Ratio (95% CI) |                      |                      |
|------------------------------------------------------------------------|------------------------|----------------------------|-----------------------|----------------------|----------------------|
|                                                                        |                        |                            | Crude                 | Model 1 <sup>a</sup> | Model 2 <sup>b</sup> |
| No use during the last 3 months prior to conception                    | 7,473                  | 6,765,205                  | Ref                   | Ref                  | Ref                  |
| Use during the last 3 months prior to conception                       | 104                    | 61,555                     | 1.62(1.33-1.96)       | 1.54(1.27-1.88)      | 1.43(1.18-1.74)      |
| <b>Sub-analysis:</b>                                                   |                        |                            |                       |                      |                      |
| <b>Paternal SSRIs use during the last 1 year before conception</b>     |                        |                            |                       |                      |                      |
| No use during the last 1 year prior to conception                      | 7,429                  | 6,736,654                  | Ref                   | Ref                  | Ref                  |
| Use only from the last 1 year to the last 3 months prior to conception | 71                     | 39,422                     | 1.71(1.35-2.16)       | 1.66(1.31-2.09)      | 1.54(1.21-1.94)      |
| Use only during the last 3 months prior to conception                  | 20                     | 14,738                     | 1.29(0.83-2.00)       | 1.24 (0.80-1.93)     | 1.17(0.75-1.82)      |
| Use both before and during the last 3 months prior to conception       | 57                     | 35,946                     | 1.52(1.17-1.97)       | 1.43(1.10-1.86)      | 1.32(1.02-1.72)      |

**Abbreviations:** AD, antidepressant drugs; SSRI, selective serotonin reuptake inhibitor; ASD, Autism Spectrum Disorder; No., number; HR, Hazard Ratio

<sup>a</sup> Adjusted for calendar year of birth, sex, parity, mother age, father age, maternal smoking, mother psychiatric history, maternal AD use during pregnancy

<sup>b</sup> Model 1 further adjusted for father psychiatric history

**Table 3. Association between paternal SSRIs use before conception and ASD in offspring born to fathers diagnosed with affective disorder or not**

| Paternal SSRIs use before conception                                   | Offspring with ASD no. | Follow-up no. of person-yr | Hazard Ratio (95% CI) |                      |                      |
|------------------------------------------------------------------------|------------------------|----------------------------|-----------------------|----------------------|----------------------|
|                                                                        |                        |                            | Crude                 | Model 1 <sup>a</sup> | Model 2 <sup>b</sup> |
| <b>Fathers with affective disorder</b>                                 |                        |                            |                       |                      |                      |
| No use during the last 3 months prior to conception                    | 58                     | 30,908                     | Ref                   | Ref                  | Ref                  |
| Use during the last 3 months prior to conception                       | 14                     | 6,625                      | 1.17(0.65-2.09)       | 1.10(0.61-1.98)      | 1.10(0.61-1.98)      |
| <i>Sub-analysis:</i>                                                   |                        |                            |                       |                      |                      |
| <i>Paternal SSRIs use during the last 1 year before conception</i>     |                        |                            |                       |                      |                      |
| No use during the last 1 year prior to conception                      | 53                     | 28,033                     | Ref                   | Ref                  | Ref                  |
| Use only from the last 1 year to the last 3 months prior to conception | 8                      | 4,082                      | 1.07(0.51-2.25)       | 1.08(0.51-2.30)      | 1.08(0.51-2.30)      |
| Use only during the last 3 months prior to conception                  | 2                      | 1,164                      | 0.91(0.22-3.75)       | 0.89(0.21-3.75)      | 0.89(0.21-3.75)      |
| Use both before and during the last 3 months prior to conception       | 9                      | 4,254                      | 1.16(0.57-2.35)       | 1.10(0.55-2.22)      | 1.10(0.55-2.22)      |
| <b>Fathers without affective disorder</b>                              |                        |                            |                       |                      |                      |
| No use during the last 3 months prior to conception                    | 7,415                  | 6,752,899                  | Ref                   | Ref                  | Ref                  |
| Use during the last 3 months prior to conception                       | 90                     | 36,329                     | 1.57(1.27-1.93)       | 1.52(1.23-1.87)      | 1.45(1.18-1.79)      |
| <i>Sub-analysis:</i>                                                   |                        |                            |                       |                      |                      |
| <i>Paternal SSRIs use during the last 1 year before conception</i>     |                        |                            |                       |                      |                      |
| No use during the last 1 year prior to conception                      | 7,376                  | 6,714,926                  | Ref                   | Ref                  | Ref                  |
| Use only from the last 1 year to the last 3 months prior to conception | 63                     | 37,973                     | 1.69(1.32-2.17)       | 1.64(1.28-2.11)      | 1.57(1.23-2.02)      |
| Use only during the last 3 months prior to conception                  | 18                     | 7,354                      | 1.26(0.79-2.00)       | 1.23(0.77-1.95)      | 1.19(0.75-1.88)      |
| Use both before and during the last 3 months prior to conception       | 48                     | 28,974                     | 1.45(1.09-1.93)       | 1.38(1.04-1.84)      | 1.32(0.99-1.76)      |

**Abbreviations:** AD, antidepressant drugs; SSRI, selective serotonin reuptake inhibitor; ASD, Autism Spectrum Disorder; No., number; HR, Hazard Ratio

<sup>a</sup> Adjusted for calendar year of birth, parity, mother age, father age, maternal smoking, mother psychiatric history, maternal AD use during pregnancy

<sup>b</sup> Model 1 further adjusted for father psychiatric history

**Table 4. Paternal SSRI use before pregnancy and ASD in exposed and unexposed siblings from 5,479 families**

| Paternal SSRIs use before conception                | Number of offspring no. | Offspring with ASD no. | Hazard Ratio (95% CI) |                      |
|-----------------------------------------------------|-------------------------|------------------------|-----------------------|----------------------|
|                                                     |                         |                        | Crude                 | Model 1 <sup>a</sup> |
| No use during the last 3 months prior to conception | 2,792                   | 45                     | Ref                   | Ref                  |
| Use during the last 3 months prior to conception    | 2,687                   | 23                     | 0.53(0.31-0.91)       | 0.74(0.34-1.59)      |

**Abbreviations:** AD, antidepressant drugs; SSRI, selective serotonin reuptake inhibitor; ASD, Autism Spectrum Disorder; No., number; HR, Hazard Ratio

<sup>a</sup> Adjusted for sex, parity, mother age, father age, maternal smoking, maternal AD use during pregnancy

**TablesS1. Association between paternal SSRIs use before conception and ASD in offspring: analyses stratified by gender**

| Paternal SSRIs use before conception                                   | Offspring with ASD no. | Follow-up no. of person-yr | Hazard Ratio (95% CI) |                      |                      |
|------------------------------------------------------------------------|------------------------|----------------------------|-----------------------|----------------------|----------------------|
|                                                                        |                        |                            | Crude                 | Model 1 <sup>a</sup> | Model 2 <sup>b</sup> |
| <b>Boys</b>                                                            |                        |                            |                       |                      |                      |
| No use during the last 3 months prior to conception                    | 6,005                  | 3,459,592                  | Ref                   | Ref                  | Ref                  |
| Use during the last 3 months prior to conception                       | 84                     | 31,642                     | 1.61(1.30-2.00)       | 1.55(1.25-1.92)      | 1.44(1.16-1.79)      |
| <i>Sub-analysis:</i>                                                   |                        |                            |                       |                      |                      |
| <i>Paternal SSRIs use during the last 1 year before conception</i>     |                        |                            |                       |                      |                      |
| No use during the last 1 year prior to conception                      | 5,969                  | 3,444,956                  | Ref                   | Ref                  | Ref                  |
| Use only from the last 1 year to the last 3 months prior to conception | 58                     | 20,031                     | 1.74(1.34-2.25)       | 1.69(1.30-2.19)      | 1.58(1.22-2.05)      |
| Use only during the last 3 months prior to conception                  | 18                     | 7,622                      | 1.42(0.89-2.26)       | 1.39(0.87-2.21)      | 1.31(0.83-2.09)      |
| Use both before and during the last 3 months prior to conception       | 44                     | 18,623                     | 1.44 (1.07-1.93)      | 1.36(1.01-1.84)      | 1.26(0.94-1.71)      |
| <b>Girls</b>                                                           |                        |                            |                       |                      |                      |
| No use during the last 3 months prior to conception                    | 1,468                  | 3,305,613                  | Ref                   | Ref                  | Ref                  |
| Use during the last 3 months prior to conception                       | 20                     | 29,914                     | 1.63(1.05-2.53)       | 1.54(0.99-2.40)      | 1.41(0.90-2.20)      |
| <i>Sub-analysis:</i>                                                   |                        |                            |                       |                      |                      |
| <i>Paternal SSRIs use during the last 1 year before conception</i>     |                        |                            |                       |                      |                      |
| No use during the last 1 year prior to conception                      | 1,460                  | 3,291,698                  | Ref                   | Ref                  | Ref                  |
| Use only from the last 1 year to the last 3 months prior to conception | 13                     | 19,390                     | 1.61(0.93-2.78)       | 1.53(0.88-2.64)      | 1.37(0.79-2.38)      |
| Use only during the last 3 months prior to conception                  | 2                      | 7,116                      | 0.67(0.17-2.69)       | 0.64(0.16-2.55)      | 0.59(0.15-2.36)      |
| Use both before and during the last 3 months prior to conception       | 13                     | 75,323                     | 1.84(1.06-3.17)       | 1.74(1.01-3.01)      | 1.59(0.92-2.75)      |

**Abbreviations:** AD, antidepressant drugs; SSRI, selective serotonin reuptake inhibitor; ASD, Autism Spectrum Disorder; No., number; HR, Hazard Ratio

<sup>a</sup> Adjusted for calendar year of birth, parity, mother age, father age, maternal smoking, mother psychiatric history, maternal AD use during pregnancy

<sup>b</sup> Model 1 further adjusted for father psychiatric history

**TableS2. Association between paternal SSRIs use before conception and ASD in offspring born to mother who neither received antidepressants medication during pregnancy nor had affective disorders before birth of child**

| Paternal SSRIs use before conception                                   | Offspring with ASD no. | Follow-up no. of person-yr | Hazard Ratio (95% CI) |                      |                      |
|------------------------------------------------------------------------|------------------------|----------------------------|-----------------------|----------------------|----------------------|
|                                                                        |                        |                            | Crude                 | Model 1 <sup>a</sup> | Model 2 <sup>b</sup> |
| No use during the last 3 months prior to conception                    | 7,184                  | 6,627,720                  | Ref                   | Ref                  | Ref                  |
| Use during the last 3 months prior to conception                       | 91                     | 57,081                     | 1.55(1.26-1.91)       | 1.57(1.28-1.93)      | 1.45(1.18-1.79)      |
| <b>Sub-analysis:</b>                                                   |                        |                            |                       |                      |                      |
| <b>Paternal SSRIs use during the last 1 year before conception</b>     |                        |                            |                       |                      |                      |
| No use during the last 1 year prior to conception                      | 7,144                  | 6,600,852                  | Ref                   | Ref                  | Ref                  |
| Use only from the last 1 year to the last 3 months prior to conception | 64                     | 37,032                     | 1.67(1.30-2.13)       | 1.68(1.31-2.15)      | 1.56(1.22-1.99)      |
| Use only during the last 3 months prior to conception                  | 16                     | 13,634                     | 1.13(0.69-1.85)       | 1.15(0.71-1.89)      | 1.08(0.66-1.77)      |
| Use both before and during the last 3 months prior to conception       | 51                     | 33,283                     | 1.50(1.13-1.97)       | 1.50(1.13-1.97)      | 1.38(1.05-1.82)      |

**Abbreviations:** AD, antidepressant drugs; SSRI, selective serotonin reuptake inhibitor; ASD, Autism Spectrum Disorder; No., number; HR, Hazard Ratio

<sup>a</sup> Adjusted for calendar year of birth, parity, mother age, father age, maternal smoking, mother psychiatric history

<sup>b</sup> Model 1 further adjusted for father psychiatric history

## STROBE Statement—checklist of items that should be included in reports of observational studies

|                              | Item No | Recommendation                                                                                                                                                                                                                                                                                                                                                                                                                                                         | Page No.       |
|------------------------------|---------|------------------------------------------------------------------------------------------------------------------------------------------------------------------------------------------------------------------------------------------------------------------------------------------------------------------------------------------------------------------------------------------------------------------------------------------------------------------------|----------------|
| <b>Title and abstract</b>    | 1       | (a) Indicate the study's design with a commonly used term in the title or the abstract                                                                                                                                                                                                                                                                                                                                                                                 | 2              |
|                              |         | (b) Provide in the abstract an informative and balanced summary of what was done and what was found                                                                                                                                                                                                                                                                                                                                                                    | 2-3            |
| <b>Introduction</b>          |         |                                                                                                                                                                                                                                                                                                                                                                                                                                                                        |                |
| Background/rationale         | 2       | Explain the scientific background and rationale for the investigation being reported                                                                                                                                                                                                                                                                                                                                                                                   | 4              |
| Objectives                   | 3       | State specific objectives, including any prespecified hypotheses                                                                                                                                                                                                                                                                                                                                                                                                       | 5              |
| <b>Methods</b>               |         |                                                                                                                                                                                                                                                                                                                                                                                                                                                                        |                |
| Study design                 | 4       | Present key elements of study design early in the paper                                                                                                                                                                                                                                                                                                                                                                                                                | 6              |
| Setting                      | 5       | Describe the setting, locations, and relevant dates, including periods of recruitment, exposure, follow-up, and data collection                                                                                                                                                                                                                                                                                                                                        | 6-8            |
| Participants                 | 6       | (a) <i>Cohort study</i> —Give the eligibility criteria, and the sources and methods of selection of participants. Describe methods of follow-up<br><i>Case-control study</i> —Give the eligibility criteria, and the sources and methods of case ascertainment and control selection. Give the rationale for the choice of cases and controls<br><i>Cross-sectional study</i> —Give the eligibility criteria, and the sources and methods of selection of participants | 6-8            |
|                              |         | (b) <i>Cohort study</i> —For matched studies, give matching criteria and number of exposed and unexposed<br><i>Case-control study</i> —For matched studies, give matching criteria and the number of controls per case                                                                                                                                                                                                                                                 |                |
| Variables                    | 7       | Clearly define all outcomes, exposures, predictors, potential confounders, and effect modifiers. Give diagnostic criteria, if applicable                                                                                                                                                                                                                                                                                                                               | 6-8            |
| Data sources/<br>measurement | 8*      | For each variable of interest, give sources of data and details of methods of assessment (measurement). Describe comparability of assessment methods if there is more than one group                                                                                                                                                                                                                                                                                   | 6-8            |
| Bias                         | 9       | Describe any efforts to address potential sources of bias                                                                                                                                                                                                                                                                                                                                                                                                              | 8-10           |
| Study size                   | 10      | Explain how the study size was arrived at                                                                                                                                                                                                                                                                                                                                                                                                                              | 10             |
| Quantitative<br>variables    | 11      | Explain how quantitative variables were handled in the analyses. If applicable, describe which groupings were chosen and why                                                                                                                                                                                                                                                                                                                                           | 8-9            |
| Statistical methods          | 12      | (a) Describe all statistical methods, including those used to control for confounding                                                                                                                                                                                                                                                                                                                                                                                  | 8-10           |
|                              |         | (b) Describe any methods used to examine subgroups and interactions                                                                                                                                                                                                                                                                                                                                                                                                    | 9              |
|                              |         | (c) Explain how missing data were addressed                                                                                                                                                                                                                                                                                                                                                                                                                            | 9              |
|                              |         | (d) <i>Cohort study</i> —If applicable, explain how loss to follow-up was addressed<br><i>Case-control study</i> —If applicable, explain how matching of cases and controls was addressed<br><i>Cross-sectional study</i> —If applicable, describe analytical methods taking account of sampling strategy                                                                                                                                                              | Not applicable |
|                              |         | (e) Describe any sensitivity analyses                                                                                                                                                                                                                                                                                                                                                                                                                                  | 9-10           |

1  
2  
3  
4  
5  
6  
7  
8  
9  
10  
11  
12  
13  
14  
15  
16  
17  
18  
19  
20  
21  
22  
23  
24  
25  
26  
27  
28  
29  
30  
31  
32  
33  
34  
35  
36  
37  
38  
39  
40  
41  
42  
43  
44  
45  
46  
47  
48  
49  
50  
51  
52  
53  
54  
55  
56  
57  
58  
59  
60

| <b>Results</b>           |     |                                                                                                                                                                                                              |                |
|--------------------------|-----|--------------------------------------------------------------------------------------------------------------------------------------------------------------------------------------------------------------|----------------|
| Participants             | 13* | (a) Report numbers of individuals at each stage of study—eg numbers potentially eligible, examined for eligibility, confirmed eligible, included in the study, completing follow-up, and analysed            | 10             |
|                          |     | (b) Give reasons for non-participation at each stage                                                                                                                                                         | Not applicable |
|                          |     | (c) Consider use of a flow diagram                                                                                                                                                                           |                |
| Descriptive data         | 14* | (a) Give characteristics of study participants (eg demographic, clinical, social) and information on exposures and potential confounders                                                                     | 10             |
|                          |     | (b) Indicate number of participants with missing data for each variable of interest                                                                                                                          | 22             |
|                          |     | (c) <i>Cohort study</i> —Summarise follow-up time (eg, average and total amount)                                                                                                                             | 11             |
| Outcome data             | 15* | <i>Cohort study</i> —Report numbers of outcome events or summary measures over time                                                                                                                          | 10-11          |
|                          |     | <i>Case-control study</i> —Report numbers in each exposure category, or summary measures of exposure                                                                                                         |                |
|                          |     | <i>Cross-sectional study</i> —Report numbers of outcome events or summary measures                                                                                                                           |                |
| Main results             | 16  | (a) Give unadjusted estimates and, if applicable, confounder-adjusted estimates and their precision (eg, 95% confidence interval). Make clear which confounders were adjusted for and why they were included | 11             |
|                          |     | (b) Report category boundaries when continuous variables were categorized                                                                                                                                    | 21             |
|                          |     | (c) If relevant, consider translating estimates of relative risk into absolute risk for a meaningful time period                                                                                             | Not relevant   |
| Other analyses           | 17  | Report other analyses done—eg analyses of subgroups and interactions, and sensitivity analyses                                                                                                               | 11-12          |
| <b>Discussion</b>        |     |                                                                                                                                                                                                              |                |
| Key results              | 18  | Summarise key results with reference to study objectives                                                                                                                                                     | 12             |
| Limitations              | 19  | Discuss limitations of the study, taking into account sources of potential bias or imprecision. Discuss both direction and magnitude of any potential bias                                                   | 15-16          |
| Interpretation           | 20  | Give a cautious overall interpretation of results considering objectives, limitations, multiplicity of analyses, results from similar studies, and other relevant evidence                                   | 13-14          |
| Generalisability         | 21  | Discuss the generalisability (external validity) of the study results                                                                                                                                        | 14-15          |
| <b>Other information</b> |     |                                                                                                                                                                                                              |                |
| Funding                  | 22  | Give the source of funding and the role of the funders for the present study and, if applicable, for the original study on which the present article is based                                                | 17             |

\*Give information separately for cases and controls in case-control studies and, if applicable, for exposed and unexposed groups in cohort and cross-sectional studies.

**Note:** An Explanation and Elaboration article discusses each checklist item and gives methodological background and published examples of transparent reporting. The STROBE checklist is best used in conjunction with this article (freely available on the Web sites of PLoS Medicine at <http://www.plosmedicine.org/>, Annals of Internal Medicine at <http://www.annals.org/>, and Epidemiology at <http://www.epidem.com/>). Information on the STROBE Initiative is available at [www.strobe-statement.org](http://www.strobe-statement.org).
