# Supplementary material for: Risk of autism spectrum disorder in offspring following paternal use of selective serotonin reuptake inhibitors before conception: a population-based cohort study
Source: PubMed Central journal article supplement (PMC5770959; doi:10.1136/bmjopen-2017-016368), 2017-12-22
Supplement: bmjopen-2017-016368supp001.pdf [file bmjopen-2017-016368supp001.pdf]

**TablesS1. Association between paternal SSRIs use before conception and ASD in offspring: analyses stratified by gender**

| Paternal SSRIs use before conception                                   | Offspring with ASD no. | Follow-up no. of person-yr | Hazard Ratio (95% CI) |                      |                      |
|------------------------------------------------------------------------|------------------------|----------------------------|-----------------------|----------------------|----------------------|
|                                                                        |                        |                            | Crude                 | Model 1 <sup>a</sup> | Model 2 <sup>b</sup> |
| <b>Boys</b>                                                            |                        |                            |                       |                      |                      |
| No use during the last 3 months prior to conception                    | 6,005                  | 3,459,592                  | Ref                   | Ref                  | Ref                  |
| Use during the last 3 months prior to conception                       | 84                     | 31,642                     | 1.61(1.30-2.00)       | 1.55(1.25-1.92)      | 1.44(1.16-1.79)      |
| <i>Sub-analysis:</i>                                                   |                        |                            |                       |                      |                      |
| <i>Paternal SSRIs use during the last 1 year before conception</i>     |                        |                            |                       |                      |                      |
| No use during the last 1 year prior to conception                      | 5,969                  | 3,444,956                  | Ref                   | Ref                  | Ref                  |
| Use only from the last 1 year to the last 3 months prior to conception | 58                     | 20,031                     | 1.74(1.34-2.25)       | 1.69(1.30-2.19)      | 1.58(1.22-2.05)      |
| Use only during the last 3 months prior to conception                  | 18                     | 7,622                      | 1.42(0.89-2.26)       | 1.39(0.87-2.21)      | 1.31(0.83-2.09)      |
| Use both before and during the last 3 months prior to conception       | 44                     | 18,623                     | 1.44 (1.07-1.93)      | 1.36(1.01-1.84)      | 1.26(0.94-1.71)      |
| <b>Girls</b>                                                           |                        |                            |                       |                      |                      |
| No use during the last 3 months prior to conception                    | 1,468                  | 3,305,613                  | Ref                   | Ref                  | Ref                  |
| Use during the last 3 months prior to conception                       | 20                     | 29,914                     | 1.63(1.05-2.53)       | 1.54(0.99-2.40)      | 1.41(0.90-2.20)      |
| <i>Sub-analysis:</i>                                                   |                        |                            |                       |                      |                      |
| <i>Paternal SSRIs use during the last 1 year before conception</i>     |                        |                            |                       |                      |                      |
| No use during the last 1 year prior to conception                      | 1,460                  | 3,291,698                  | Ref                   | Ref                  | Ref                  |
| Use only from the last 1 year to the last 3 months prior to conception | 13                     | 19,390                     | 1.61(0.93-2.78)       | 1.53(0.88-2.64)      | 1.37(0.79-2.38)      |
| Use only during the last 3 months prior to conception                  | 2                      | 7,116                      | 0.67(0.17-2.69)       | 0.64(0.16-2.55)      | 0.59(0.15-2.36)      |
| Use both before and during the last 3 months prior to conception       | 13                     | 75,323                     | 1.84(1.06-3.17)       | 1.74(1.01-3.01)      | 1.59(0.92-2.75)      |

**Abbreviations:** AD, antidepressant drugs; SSRI, selective serotonin reuptake inhibitor; ASD, Autism Spectrum Disorder; No., number; HR, Hazard Ratio

<sup>a</sup> Adjusted for calendar year of birth, parity, mother age, father age, maternal smoking, mother psychiatric history, maternal AD use during pregnancy

<sup>b</sup> Model 1 further adjusted for father psychiatric history

**TableS2. Association between paternal SSRIs use before conception and ASD in offspring born to mother who neither received antidepressants medication during pregnancy nor had affective disorders before birth of child**

| Paternal SSRIs use before conception                                      | Offspring with ASD no. | Follow-up no. of person-yr | Hazard Ratio (95% CI) |                      |                      |
|---------------------------------------------------------------------------|------------------------|----------------------------|-----------------------|----------------------|----------------------|
|                                                                           |                        |                            | Crude                 | Model 1 <sup>a</sup> | Model 2 <sup>b</sup> |
| No use during the last 3 months prior to conception                       | 7,184                  | 6,627,720                  | Ref                   | Ref                  | Ref                  |
| Use during the last 3 months prior to conception                          | 91                     | 57,081                     | 1.55(1.26-1.91)       | 1.57(1.28-1.93)      | 1.45(1.18-1.79)      |
| <b><i>Sub-analysis:</i></b>                                               |                        |                            |                       |                      |                      |
| <b><i>Paternal SSRIs use during the last 1 year before conception</i></b> |                        |                            |                       |                      |                      |
| No use during the last 1 year prior to conception                         | 7,144                  | 6,600,852                  | Ref                   | Ref                  | Ref                  |
| Use only from the last 1 year to the last 3 months prior to conception    | 64                     | 37,032                     | 1.67(1.30-2.13)       | 1.68(1.31-2.15)      | 1.56(1.22-1.99)      |
| Use only during the last 3 months prior to conception                     | 16                     | 13,634                     | 1.13(0.69-1.85)       | 1.15(0.71-1.89)      | 1.08(0.66-1.77)      |
| Use both before and during the last 3 months prior to conception          | 51                     | 33,283                     | 1.50(1.13-1.97)       | 1.50(1.13-1.97)      | 1.38(1.05-1.82)      |

**Abbreviations:** AD, antidepressant drugs; SSRI, selective serotonin reuptake inhibitor; ASD, Autism Spectrum Disorder; No., number; HR, Hazard Ratio

<sup>a</sup> Adjusted for calendar year of birth, parity, mother age, father age, maternal smoking, mother psychiatric history

<sup>b</sup> Model 1 further adjusted for father psychiatric history
